# Supplementary material for: Microhydration of guanine⋯cytosine base pairs, a theoretical Study on the role of water in stability, structure and tautomeric equilibrium
Source: Royal Society of Chemistry journal article supplement (doi:10.1039/b819350a), 2009-01-01
Supplement: b819350a.pdf [file b819350a.pdf]

**Table 1S** Populations of different motifs of bare (0W), monohydrated (1W) and dihydrated (2W) complexes of guanine⋯cytosine and their tautomers.

|        | Populations [%] |                 |                 |       |       |       |       |       |       |
|--------|-----------------|-----------------|-----------------|-------|-------|-------|-------|-------|-------|
|        | 0W              |                 |                 | 1W    |       |       | 2W    |       |       |
|        | HB <sup>a</sup> | ST <sup>b</sup> | TS <sup>c</sup> | HB    | ST    | TS    | HB    | ST    | TS    |
| G19C1  | 73.93           | 1.08            | 24.99           | 77.20 | 3.38  | 19.41 | 54.20 | 15.10 | 30.70 |
| G17C1  | 80.13           | 0.00            | 19.86           | 80.55 | 3.05  | 16.40 | 78.03 | 6.03  | 15.56 |
| G19C2A | 77.72           | 0.01            | 22.27           | 98.53 | 0.18  | 1.29  | 93.27 | 1.85  | 4.88  |
| G19C2B | 70.22           | 10.72           | 19.05           | 68.55 | 9.81  | 21.64 | 56.93 | 14.40 | 28.66 |
| G17C2A | 54.79           | 1.76            | 43.44           | 64.25 | 1.74  | 34.00 | 63.01 | 5.00  | 31.97 |
| G17C2B | 60.98           | 7.96            | 31.06           | 61.88 | 8.68  | 29.44 | 54.75 | 10.60 | 34.47 |
| G91C1  | 57.27           | 17.21           | 25.51           | 49.57 | 13.55 | 36.87 | 44.51 | 17.75 | 37.65 |
| G92C1  | 36.07           | 9.61            | 54.32           | 39.55 | 16.80 | 43.65 | 36.23 | 24.91 | 38.52 |
| G91C2A | 51.16           | 7.69            | 41.14           | 43.73 | 8.62  | 47.65 | 38.40 | 13.82 | 47.78 |
| G91C2B | 70.42           | 4.57            | 25.01           | 47.94 | 8.62  | 43.44 | 40.64 | 13.86 | 45.45 |
| G92C2A | 38.64           | 0.00            | 61.36           | 33.72 | 11.03 | 55.25 | 28.88 | 20.55 | 50.57 |
| G92C2B | 47.10           | 7.39            | 45.50           | 45.47 | 16.16 | 38.37 | 34.81 | 22.76 | 42.42 |

<sup>a</sup> hydrogen bonded (HB)<sup>b</sup> stacked (ST)<sup>c</sup> T-shaped (TS)**Table 2aS** Interaction energies of different motifs (HB, ST, TS) of bare (0W), monohydrated (1W) and dihydrated (2W) complexes of guanine⋯cytosine and their tautomers computed by DFT-D/cc-pVTZ method.

|        | Interaction energies [kcal/mol] |        |        |                 |        |        |                 |        |        |
|--------|---------------------------------|--------|--------|-----------------|--------|--------|-----------------|--------|--------|
|        | HB <sup>a</sup>                 |        |        | ST <sup>b</sup> |        |        | TS <sup>c</sup> |        |        |
|        | 0W                              | 1W     | 2W     | 0W              | 1W     | 2W     | 0W              | 1W     | 2W     |
| G19C1  | -32.23                          | -41.84 | -58.24 | -14.01          | -27.66 | -48.72 |                 | -37.06 | -48.26 |
| G17C1  | -30.07                          | -43.47 | -56.27 |                 | -32.58 | -49.50 |                 | -34.90 | -45.24 |
| G19C2A | -24.16                          | -32.20 | -46.45 |                 | -25.03 | -40.31 | -12.57          | -27.36 | -39.60 |
| G19C2B | -15.80                          | -25.87 | -33.00 |                 | -29.88 | -44.58 | -11.76          |        | -40.23 |
| G17C2A | -22.51                          | -36.18 | -47.34 |                 | -22.08 | -39.22 | -12.15          | -26.53 | -39.58 |
| G17C2B | -15.19                          | -29.84 | -41.73 | -11.20          | -24.18 | -41.26 | -10.60          | -25.38 | -39.58 |
| G91C1  | -20.72                          | -37.72 | -47.29 | -12.36          | -31.15 | -48.00 | -13.45          | -31.51 | -40.19 |
| G92C1  | -19.92                          | -32.48 | -46.62 | -12.76          | -28.59 | -43.75 | -12.71          | -28.18 | -41.60 |
| G91C2A | -17.90                          | -34.80 | -38.58 | -8.67           | -26.38 | -40.97 | -9.04           | -22.55 | -34.13 |
| G91C2B | -13.30                          | -33.10 | -37.36 | -9.59           | -22.13 | -42.91 | -9.66           |        | -42.14 |
| G92C2A | -26.33                          | -34.47 | -50.68 | -8.83           | -23.77 | -44.24 | -7.51           | -27.84 | -35.98 |
| G92C2B | -24.60                          |        |        | -10.09          |        | -39.47 | -10.70          |        | -40.91 |

<sup>a</sup> hydrogen bonded (HB)<sup>b</sup> stacked (ST)<sup>c</sup> T-shaped (TS)

**Table 2bS** BSSE corrected interaction energies of different motifs (HB, ST, TS) of bare (0W), monohydrated (1W) and dihydrated (2W) complexes of guanine...cytosine and their tautomers computed by RI-MP2/cc-pVTZ method.

|        | Interaction energies [kcal/mol] |        |        |                 |        |        |                 |        |        |
|--------|---------------------------------|--------|--------|-----------------|--------|--------|-----------------|--------|--------|
|        | HB <sup>a</sup>                 |        |        | ST <sup>b</sup> |        |        | TS <sup>c</sup> |        |        |
|        | 0W                              | 1W     | 2W     | 0W              | 1W     | 2W     | 0W              | 1W     | 2W     |
| G19C1  | -29.13                          | -38.12 | -51.28 | -17.71          | -28.90 | -46.97 |                 |        | -44.71 |
| G17C1  | -26.89                          | -39.35 | -50.11 |                 | -33.94 | -49.17 |                 | -31.33 |        |
| G19C2A | -16.62                          | -28.91 | -42.26 |                 | -27.38 | -32.57 |                 |        |        |
| G19C2B | -15.27                          | -24.91 | -43.81 |                 | -30.57 | -40.44 |                 |        |        |
| G17C2A | -20.29                          | -33.74 | -34.23 |                 | -23.05 | -42.57 |                 |        |        |
| G17C2B | -14.69                          | -28.01 | -34.10 | -14.17          | -30.51 | -40.25 | -11.46          | -23.34 |        |
| G91C1  | -20.74                          | -34.98 | -37.88 | -15.73          | -31.83 | -44.06 |                 |        |        |
| G92C1  | -19.80                          | -31.29 | -43.17 | -16.58          | -30.45 | -43.57 | -15.92          |        |        |
| G91C2A | -17.40                          | -31.59 | -40.64 | -12.27          | -26.81 | -34.94 |                 |        |        |
| G91C2B | -10.50                          | -28.24 | -31.79 | -12.20          | -27.63 | -42.11 | -10.80          |        |        |
| G92C2A | -20.57                          | -29.22 | -41.06 | -11.59          | -25.61 | -42.11 |                 |        |        |
| G92C2B | -19.45                          | -29.85 | -44.81 | -13.48          | -24.01 | -38.45 |                 |        |        |

<sup>a</sup> hydrogen bonded (HB)

<sup>b</sup> stacked (ST)

<sup>c</sup> T-shaped (TS)
