# Supplementary material for: Microhydration of guanine⋯cytosine base pairs, a theoretical Study on the role of water in stability, structure and tautomeric equilibrium
Source: Royal Society of Chemistry journal article supplement (doi:10.1039/b819350a), 2009-01-01
Supplement: b819350a_dftd.pdf [file b819350a_dftd.pdf]

29

G19C1 HB

|   |            |            |            |
|---|------------|------------|------------|
| C | 1.4060135  | 0.0327715  | -0.9520837 |
| O | 0.7962259  | 0.0404286  | -2.0376940 |
| H | -0.3521448 | 0.0647904  | 0.1581405  |
| N | 0.6832495  | 0.0605847  | 0.2573825  |
| C | 1.2216807  | 0.0506784  | 1.5213732  |
| N | 0.3542253  | 0.1075912  | 2.5562984  |
| H | -0.6620558 | 0.0349785  | 2.4344495  |
| H | 0.7503633  | 0.0141142  | 3.4782147  |
| N | 2.5282251  | 0.0091798  | 1.7587833  |
| C | 3.2473867  | -0.0143508 | 0.6192000  |
| N | 4.6179653  | -0.0567181 | 0.5338882  |
| C | 2.8114895  | -0.0038397 | -0.7126937 |
| N | 3.8842108  | -0.0384779 | -1.5908368 |
| C | 4.9378219  | -0.0686698 | -0.8153612 |
| H | 5.9654784  | -0.1000073 | -1.1487281 |
| H | 5.2568650  | -0.0729529 | 1.3166370  |
| N | -2.1981648 | 0.0068426  | -0.0756093 |
| C | -2.7503761 | 0.0157779  | -1.3004656 |
| N | -1.9213539 | 0.0481635  | -2.3477216 |
| H | -0.8825240 | 0.0524140  | -2.2153750 |
| H | -2.2995819 | 0.0521465  | -3.2824628 |
| C | -2.9664695 | -0.0326398 | 1.0413275  |
| O | -2.5255868 | -0.0499901 | 2.1982381  |
| N | -4.3676240 | -0.0553790 | 0.8605298  |
| H | -4.9213499 | -0.0862767 | 1.7071911  |
| C | -4.9472080 | -0.0445452 | -0.3701186 |
| H | -6.0306335 | -0.0664423 | -0.3996745 |
| C | -4.1776009 | -0.0087828 | -1.4866701 |
| H | -4.6270303 | -0.0004677 | -2.4714287 |

29

G19C2A HB

|   |            |            |            |
|---|------------|------------|------------|
| C | 0.0523503  | 1.2655358  | -1.5311996 |
| N | 0.1254116  | 0.4186588  | -2.5902563 |
| H | 0.0268991  | -0.5851157 | -2.4853747 |
| H | -0.0217867 | 0.8302243  | -3.4985386 |
| N | 0.0822761  | 0.7079931  | -0.2769580 |
| H | 0.1066356  | -0.3252822 | -0.1853404 |
| C | 0.0581014  | 1.4248121  | 0.9444096  |
| O | 0.0870669  | 0.8099504  | 2.0211040  |
| C | -0.0020141 | 2.8320434  | 0.7136557  |
| N | -0.0437075 | 3.8949766  | 1.6022591  |
| C | -0.0995735 | 4.9555199  | 0.8373775  |
| H | -0.1431230 | 5.9792118  | 1.1812138  |
| N | -0.0985138 | 4.6488690  | -0.5144209 |
| H | -0.1326677 | 5.2951433  | -1.2907451 |
| C | -0.0350699 | 3.2808722  | -0.6113944 |
| N | -0.0132849 | 2.5690072  | -1.7571919 |
| C | -0.0167250 | -3.1385915 | -0.9274657 |
| O | 0.0105605  | -2.5833627 | -2.1756526 |
| H | -0.0509516 | -3.3359410 | -2.7899356 |
| N | -0.1005437 | -4.4635577 | -0.8886123 |
| C | -0.1222658 | -4.9694870 | 0.3662543  |
| H | -0.1917878 | -6.0516620 | 0.4389476  |
| C | -0.0638785 | -4.1905044 | 1.4972886  |
| H | -0.0840934 | -4.6320063 | 2.4873988  |
| C | 0.0231644  | -2.7838286 | 1.3207115  |
| N | 0.0923885  | -1.9242719 | 2.3458084  |
| H | 0.0480970  | -2.2789707 | 3.2881426  |
| H | 0.1066602  | -0.8956347 | 2.1966954  |
| N | 0.0452195  | -2.2591315 | 0.0653868  |

29

## G19C2B HB

|   |            |            |            |
|---|------------|------------|------------|
| N | -2.8593927 | 1.6552188  | -0.0089909 |
| C | -3.5189557 | 0.4731989  | -0.0288964 |
| N | -4.8826078 | 0.3194272  | -0.0915333 |
| H | -5.5600606 | 1.0685138  | -0.1225691 |
| C | -5.1328407 | -1.0431104 | -0.0955183 |
| H | -6.1412466 | -1.4295890 | -0.1380789 |
| N | -4.0396841 | -1.7619946 | -0.0424236 |
| C | -3.0141228 | -0.8314504 | 0.0009483  |
| C | -1.5910598 | -1.0107387 | 0.0586747  |
| O | -0.9128295 | -2.0372930 | 0.0788715  |
| N | -0.9426466 | 0.2591731  | 0.0917279  |
| H | 0.0939264  | 0.2218289  | 0.1098553  |
| C | -1.5504170 | 1.4805257  | 0.0603520  |
| N | -0.7375457 | 2.5809801  | 0.1594909  |
| H | 0.2443708  | 2.4949616  | -0.0726410 |
| H | -1.1818342 | 3.4530142  | -0.0898406 |
| N | 4.2523478  | 0.6373236  | -0.0701750 |
| C | 4.5842126  | -0.6692295 | -0.0306943 |
| N | 5.9156437  | -0.9519685 | -0.0194988 |
| H | 6.5556838  | -0.1989115 | -0.2274842 |
| H | 6.2278342  | -1.8944832 | -0.1941398 |
| C | 3.5947352  | -1.6739358 | 0.0299584  |
| H | 3.8492123  | -2.7270886 | 0.0590743  |
| C | 2.2809842  | -1.2564308 | 0.0531153  |
| H | 1.4443592  | -1.9514697 | 0.0954095  |
| N | 1.9315847  | 0.0492412  | 0.0223208  |
| C | 2.9483142  | 0.9011711  | -0.0383280 |
| O | 2.5917655  | 2.2116123  | -0.0778953 |
| H | 3.4211626  | 2.7184154  | -0.1182091 |

29

## G17C1 HB

|   |            |            |            |
|---|------------|------------|------------|
| H | 3.8648127  | 2.5270018  | -0.0671090 |
| N | 3.8803404  | 1.5171112  | -0.0590070 |
| C | 2.7798475  | 0.6814698  | -0.0065090 |
| C | 3.2952717  | -0.6227292 | -0.0167551 |
| N | 4.6734794  | -0.5871214 | -0.0744551 |
| C | 4.9726207  | 0.6997114  | -0.0973828 |
| H | 5.9756269  | 1.1011618  | -0.1417822 |
| N | 2.5426745  | -1.7480920 | 0.0232363  |
| C | 1.3912182  | 0.9395775  | 0.0366568  |
| O | 0.8116239  | 2.0518957  | 0.0412064  |
| N | 0.6746960  | -0.2574270 | 0.0752982  |
| H | -0.3619275 | -0.1683318 | 0.0823008  |
| C | 1.2417476  | -1.5189171 | 0.0743980  |
| N | 0.3779399  | -2.5594528 | 0.1605855  |
| H | 0.7843260  | -3.4749158 | 0.0452961  |
| H | -0.6336377 | -2.4460307 | 0.0491306  |
| C | -2.7611193 | 1.2960251  | 0.0302483  |
| N | -1.9353804 | 2.3480012  | 0.0801229  |
| H | -2.3186895 | 3.2805733  | 0.0889365  |
| H | -0.8984952 | 2.2224758  | 0.0773422  |
| N | -2.2043529 | 0.0752871  | 0.0090159  |
| C | -2.9686273 | -1.0455790 | -0.0529097 |
| O | -2.5237544 | -2.1987385 | -0.0824670 |
| N | -4.3706593 | -0.8671723 | -0.0858456 |
| H | -4.9214446 | -1.7152036 | -0.1319349 |
| C | -4.9541596 | 0.3605773  | -0.0585355 |
| H | -6.0375379 | 0.3871200  | -0.0872107 |
| C | -4.1883621 | 1.4792652  | 0.0006417  |
| H | -4.6414120 | 2.4622002  | 0.0222694  |

29

## G17C2A HB

|   |            |            |            |
|---|------------|------------|------------|
| N | 2.5840322  | 1.7454709  | 0.0352026  |
| C | 3.3305994  | 0.6140054  | -0.0294371 |
| N | 4.7047035  | 0.5696854  | -0.1222526 |
| C | 4.9927319  | -0.7198409 | -0.1585358 |
| H | 5.9908479  | -1.1292498 | -0.2294796 |
| N | 3.8941462  | -1.5276110 | -0.0965154 |
| H | 3.8692201  | -2.5374401 | -0.1094198 |
| C | 2.8036377  | -0.6834558 | -0.0123936 |
| C | 1.4130780  | -0.9346694 | 0.0581020  |
| O | 0.8277901  | -2.0378259 | 0.0652952  |
| N | 0.7043855  | 0.2730677  | 0.1213336  |
| H | -0.3286958 | 0.1904102  | 0.1394789  |
| C | 1.2882639  | 1.5251960  | 0.1185677  |
| N | 0.4419108  | 2.5869932  | 0.2629312  |
| H | 0.8651019  | 3.4837919  | 0.0723246  |
| H | -0.5469216 | 2.4875057  | 0.0589124  |
| N | -2.2685425 | -0.0653391 | 0.0149425  |
| C | -2.8026777 | -1.3141585 | 0.0508059  |
| N | -1.9479247 | -2.3444811 | 0.1458142  |
| H | -0.9213690 | -2.2037542 | 0.1312703  |
| H | -2.3103170 | -3.2847442 | 0.1444474  |
| C | -4.2106718 | -1.4843792 | -0.0062316 |
| H | -4.6608499 | -2.4703103 | 0.0243754  |
| C | -4.9818221 | -0.3494717 | -0.1004668 |
| H | -6.0656846 | -0.4160164 | -0.1455026 |
| N | -4.4662765 | 0.8999870  | -0.1433240 |
| C | -3.1392021 | 0.9331184  | -0.0827672 |
| O | -2.5717390 | 2.1726466  | -0.1275360 |
| H | -3.3172084 | 2.7949799  | -0.1949488 |

29

G17C2B HB

|   |            |            |            |
|---|------------|------------|------------|
| C | -1.4676781 | 1.5687900  | 0.0668192  |
| N | -2.5622418 | 0.7446922  | 0.1733241  |
| H | -3.4324647 | 1.1843307  | -0.0920518 |
| H | -2.4676643 | -0.2352667 | -0.0630107 |
| N | -0.2417560 | 0.9470730  | 0.1256537  |
| H | -0.2081010 | -0.0869584 | 0.1597376  |
| C | 1.0047708  | 1.6026317  | 0.0933311  |
| O | 2.0705020  | 0.9714883  | 0.1318269  |
| C | 0.7904308  | 3.0065026  | 0.0106545  |
| C | -0.4863986 | 3.5757211  | -0.0521541 |
| N | -1.6491245 | 2.8674726  | -0.0305363 |
| N | -0.3936046 | 4.9478785  | -0.1459178 |
| N | 1.6717652  | 4.0680011  | -0.0479782 |
| C | 0.9054670  | 5.1939841  | -0.1383500 |
| H | 1.3502522  | 6.1777227  | -0.1957610 |
| H | 2.6798826  | 4.0065626  | -0.0239864 |
| O | -2.2055989 | -2.5953890 | -0.0496271 |
| H | -2.7190888 | -3.4195541 | -0.1088837 |
| C | -0.8993682 | -2.9628102 | -0.0234661 |
| N | -0.0367540 | -1.9554858 | 0.0593972  |
| C | 1.2642734  | -2.3190827 | 0.0761518  |
| H | 1.9701820  | -1.4933671 | 0.1355173  |
| C | 1.6707300  | -3.6356516 | 0.0205418  |
| H | 2.7213752  | -3.9008785 | 0.0398707  |
| C | 0.6561178  | -4.6137457 | -0.0604341 |
| N | -0.6463454 | -4.2681132 | -0.0884820 |
| N | 0.9255305  | -5.9476702 | -0.0820137 |
| H | 0.1644442  | -6.5747568 | -0.3002794 |
| H | 1.8639294  | -6.2669851 | -0.2656706 |

29

G91C1 HB

|   |           |            |            |
|---|-----------|------------|------------|
| N | 1.2653503 | -1.0751003 | -0.0749695 |
|---|-----------|------------|------------|

|   |            |            |            |
|---|------------|------------|------------|
| C | 1.3569851  | 0.2659831  | -0.0226769 |
| N | 0.3505425  | 1.1897924  | -0.0126051 |
| H | -0.6651556 | 0.9580819  | -0.0322059 |
| C | 0.9605333  | 2.4248165  | 0.0463878  |
| H | 0.3717806  | 3.3306935  | 0.0659151  |
| N | 2.2771370  | 2.3697635  | 0.0739063  |
| C | 2.5423661  | 1.0099329  | 0.0317521  |
| C | 3.7264590  | 0.2639616  | 0.0283146  |
| O | 4.9482927  | 0.8373565  | 0.0722213  |
| H | 4.8086506  | 1.8008870  | 0.1042352  |
| N | 3.6901751  | -1.0610314 | -0.0269336 |
| C | 2.4790757  | -1.6599057 | -0.0720461 |
| N | 2.5082041  | -3.0395435 | -0.0724210 |
| H | 3.4004821  | -3.4355449 | -0.3353753 |
| H | 1.6985170  | -3.4966122 | -0.4675981 |
| C | -3.9223354 | -1.6518611 | 0.1081192  |
| H | -4.1423163 | -2.7095025 | 0.1754666  |
| C | -4.9214409 | -0.7334858 | 0.0543990  |
| H | -5.9712626 | -1.0041646 | 0.0770257  |
| N | -4.6298806 | 0.5892562  | -0.0309743 |
| H | -5.3587142 | 1.2906628  | -0.0704079 |
| C | -3.2983665 | 1.0874347  | -0.0683198 |
| O | -3.1159724 | 2.2981054  | -0.1373238 |
| N | -2.3009901 | 0.1526264  | -0.0217494 |
| C | -2.5738188 | -1.1524053 | 0.0640681  |
| N | -1.5378498 | -2.0099185 | 0.1123740  |
| H | -1.7206158 | -2.9989163 | 0.1810442  |
| H | -0.5538743 | -1.6922126 | 0.0512043  |

29

G91C2A HB

|   |            |            |            |
|---|------------|------------|------------|
| N | -0.1796511 | 1.2891496  | -1.0736650 |
| C | -0.0654290 | 1.3667964  | 0.2624106  |
| N | -0.0526737 | 0.3487748  | 1.1753808  |
| H | -0.1146445 | -0.6600462 | 0.9346898  |
| C | 0.0898295  | 0.9421999  | 2.4128787  |
| H | 0.1294270  | 0.3459819  | 3.3132537  |
| N | 0.1660594  | 2.2563948  | 2.3689390  |
| C | 0.0701026  | 2.5395212  | 1.0154319  |
| C | 0.0808283  | 3.7312974  | 0.2801140  |
| O | 0.2024171  | 4.9441811  | 0.8604228  |
| H | 0.2742677  | 4.7961433  | 1.8203802  |
| N | -0.0379232 | 3.7104767  | -1.0402607 |
| C | -0.1571705 | 2.5079276  | -1.6479153 |
| N | -0.2198030 | 2.5498504  | -3.0238991 |
| H | -0.4594671 | 3.4548443  | -3.4050880 |
| H | -0.6582576 | 1.7567493  | -3.4703613 |
| N | -0.0246478 | -4.6937301 | 0.6191540  |
| C | 0.1805915  | -4.9219575 | -0.6961131 |
| H | 0.2773678  | -5.9653154 | -0.9856076 |
| C | 0.2660567  | -3.9220150 | -1.6388759 |
| H | 0.4307980  | -4.1471394 | -2.6866009 |
| C | 0.1262280  | -2.5873801 | -1.1815216 |
| N | 0.1910447  | -1.5279829 | -2.0122738 |
| H | 0.0493154  | -0.5578132 | -1.6933521 |
| H | 0.3494169  | -1.6880628 | -2.9945209 |
| N | -0.0764536 | -2.3397646 | 0.1343161  |
| C | -0.1357063 | -3.4043434 | 0.9326674  |
| O | -0.3346313 | -3.1075269 | 2.2399862  |
| H | -0.3530825 | -3.9656666 | 2.6994905  |

29

G91C2B HB

|   |            |           |            |
|---|------------|-----------|------------|
| N | -1.6828583 | 0.2737159 | -2.2666065 |
| C | -0.8944369 | 0.1310343 | -3.3305763 |

|   |            |            |            |
|---|------------|------------|------------|
| N | -1.2329444 | 0.1709879  | -4.6656375 |
| H | -2.1596617 | 0.3170635  | -5.0415256 |
| C | -0.0654206 | -0.0315042 | -5.3870367 |
| H | -0.0695066 | -0.0446271 | -6.4676813 |
| N | 0.9906983  | -0.1964021 | -4.6284106 |
| C | 0.4890563  | -0.0984143 | -3.3385314 |
| C | 1.0852423  | -0.1740481 | -2.0759811 |
| O | 2.4111221  | -0.3747493 | -1.8977983 |
| H | 2.8143523  | -0.4546792 | -2.7803441 |
| N | 0.3569521  | -0.0379278 | -0.9798926 |
| C | -0.9872011 | 0.1749185  | -1.1129643 |
| N | -1.6730726 | 0.3013446  | 0.0454455  |
| H | -1.2024739 | 0.1947202  | 0.9490798  |
| H | -2.6578752 | 0.5064837  | -0.0076278 |
| N | -0.4728553 | -0.0491324 | 5.1332193  |
| C | 0.8438770  | 0.2413865  | 5.1814103  |
| H | 1.2537258  | 0.3967880  | 6.1767888  |
| C | 1.6561540  | 0.3375900  | 4.0721415  |
| H | 2.7138564  | 0.5594861  | 4.1606645  |
| C | 1.0464144  | 0.1381454  | 2.8107352  |
| N | 1.7293720  | 0.2011416  | 1.6509418  |
| H | 1.2615596  | 0.0721625  | 0.7442446  |
| H | 2.7115072  | 0.4242115  | 1.6609455  |
| N | -0.2798784 | -0.1301844 | 2.7353744  |
| C | -0.9341033 | -0.2243022 | 3.9008477  |
| O | -2.2508210 | -0.5422987 | 3.8188388  |
| H | -2.4286060 | -0.7256947 | 2.8811170  |

29

G92C1 HB

|   |            |            |            |
|---|------------|------------|------------|
| N | 0.3446976  | 0.0103768  | 1.1784651  |
| H | -0.6675203 | 0.0120251  | 0.9298801  |
| C | 0.9342904  | -0.0168511 | 2.4256420  |
| H | 0.3281896  | -0.0258163 | 3.3205285  |
| N | 2.2493715  | -0.0320463 | 2.3989489  |
| C | 2.5466100  | -0.0142276 | 1.0446303  |
| C | 3.7266400  | -0.0156254 | 0.2933415  |
| O | 4.9394892  | -0.0398590 | 0.8777310  |
| H | 5.5834695  | -0.0365475 | 0.1456538  |
| N | 3.6878196  | 0.0149420  | -1.0400930 |
| C | 2.4841552  | 0.0380484  | -1.6528890 |
| N | 2.5181714  | 0.0116002  | -3.0336063 |
| H | 3.4061661  | 0.2828307  | -3.4335251 |
| H | 1.7067726  | 0.3969709  | -3.4964742 |
| N | 1.2760523  | 0.0417319  | -1.0668189 |
| C | 1.3668541  | 0.0132175  | 0.2763499  |
| N | -2.3036725 | -0.0032133 | 0.1469300  |
| C | -3.3004879 | 0.0280870  | 1.0835261  |
| O | -3.1177934 | 0.0616856  | 2.2951640  |
| N | -4.6326377 | 0.0174778  | 0.5843887  |
| H | -5.3608147 | 0.0395425  | 1.2872568  |
| C | -4.9245063 | -0.0171583 | -0.7403867 |
| H | -5.9744710 | -0.0206366 | -1.0116677 |
| C | -3.9259042 | -0.0440730 | -1.6606611 |
| H | -4.1468690 | -0.0712922 | -2.7198670 |
| C | -2.5772701 | -0.0354925 | -1.1597442 |
| N | -1.5409764 | -0.0625383 | -2.0182292 |
| H | -0.5574686 | -0.0378043 | -1.6973211 |
| H | -1.7224066 | -0.0989980 | -3.0090937 |

29

G92C2A HB

|   |           |            |            |
|---|-----------|------------|------------|
| N | 0.9419311 | 0.6923755  | -0.0338506 |
| C | 1.3645153 | -0.5896068 | -0.0355530 |
| O | 0.4872061 | -1.5691125 | -0.0578365 |

|   |            |            |            |
|---|------------|------------|------------|
| H | -0.4834588 | -1.2047966 | -0.0565973 |
| C | 2.7500884  | -0.8360097 | -0.0102571 |
| N | 3.5100058  | -1.9985121 | -0.0035657 |
| C | 4.7458153  | -1.5702565 | 0.0357561  |
| H | 5.6262953  | -2.1972342 | 0.0510694  |
| N | 4.8490457  | -0.1868467 | 0.0572849  |
| H | 5.6959249  | 0.3636331  | 0.0851902  |
| C | 3.5659841  | 0.3052776  | 0.0269620  |
| N | 3.1864935  | 1.5877618  | 0.0379355  |
| C | 1.8524814  | 1.7038828  | -0.0035627 |
| N | 1.3490189  | 2.9778155  | -0.0641861 |
| H | 1.9953250  | 3.7150648  | 0.1751218  |
| H | 0.3772593  | 3.1289697  | 0.1651290  |
| N | -2.0364663 | -0.7866797 | -0.0327622 |
| C | -2.9706754 | -1.7556032 | -0.0134439 |
| H | -2.5929488 | -2.7744755 | -0.0251999 |
| C | -4.3214765 | -1.4960626 | 0.0184962  |
| H | -5.0521671 | -2.2963844 | 0.0268878  |
| C | -4.6899383 | -0.1305023 | 0.0342275  |
| N | -5.9956987 | 0.2626884  | 0.0268111  |
| H | -6.7195885 | -0.3989135 | 0.2605270  |
| H | -6.1782060 | 1.2413081  | 0.1998980  |
| N | -3.7796221 | 0.8534905  | 0.0227706  |
| C | -2.4966601 | 0.4860381  | -0.0147634 |
| O | -1.6068945 | 1.4642735  | -0.0320012 |
| H | -0.6493434 | 1.0802557  | -0.0522475 |

29

G92C2B HB

|   |            |            |            |
|---|------------|------------|------------|
| N | -0.0377004 | 3.1402971  | 1.5208811  |
| C | 0.0257383  | 1.8222563  | 1.7587058  |
| N | 0.0953089  | 1.4361390  | 3.0702583  |
| H | -0.1462883 | 2.1405095  | 3.7513256  |
| H | -0.1075000 | 0.4762706  | 3.3090221  |
| N | 0.0687882  | 0.8258925  | 0.8319832  |
| C | 0.0591261  | 1.1347774  | -0.4782319 |
| O | 0.0960773  | 0.1619018  | -1.3706127 |
| H | 0.1015416  | -0.7588119 | -0.9062012 |
| C | 0.0084445  | 2.4877625  | -0.8537460 |
| N | -0.0169074 | 3.1391750  | -2.0805177 |
| C | -0.0758593 | 4.4077425  | -1.7645473 |
| H | -0.1092129 | 5.2279883  | -2.4679781 |
| N | -0.0929775 | 4.6352380  | -0.3961461 |
| H | -0.1338118 | 5.5282475  | 0.0752397  |
| C | -0.0383648 | 3.4030324  | 0.2104648  |
| N | 0.0479987  | -2.3129852 | -0.3973531 |
| C | 0.0005596  | -2.6604689 | 0.9097484  |
| O | 0.0401228  | -1.6801438 | 1.8014973  |
| H | 0.0808100  | -0.7670072 | 1.3416909  |
| N | -0.0838410 | -3.9019138 | 1.3953989  |
| C | -0.1229370 | -4.8697621 | 0.4665598  |
| H | -0.1938389 | -5.8858139 | 0.8490216  |
| C | -0.0803676 | -4.6472835 | -0.8981040 |
| H | -0.1106649 | -5.4636132 | -1.6106382 |
| C | 0.0099855  | -3.3050211 | -1.3090757 |
| N | 0.0992067  | -2.9496274 | -2.6227076 |
| H | -0.1094406 | -3.6370638 | -3.3295170 |
| H | 0.0027448  | -1.9784461 | -2.8844036 |

29

G19C1 ST

|   |           |           |            |
|---|-----------|-----------|------------|
| N | 0.6758224 | 2.1954854 | -0.2650695 |
| C | 1.9990813 | 1.8218945 | -0.3852978 |
| H | 2.6550747 | 2.3082751 | -1.0917756 |
| N | 2.3370521 | 0.8483069 | 0.4261437  |

|   |            |            |            |
|---|------------|------------|------------|
| C | 1.1661083  | 0.5432334  | 1.0964195  |
| C | 0.8754017  | -0.5280430 | 2.0002685  |
| O | 1.5633954  | -1.4597419 | 2.4043271  |
| N | -0.4997124 | -0.4479478 | 2.4148064  |
| H | -0.7839226 | -1.2159432 | 3.0138369  |
| C | -1.4423740 | 0.4207268  | 1.9322368  |
| N | -2.7470990 | 0.2347827  | 2.3575625  |
| H | -2.8721175 | -0.0658439 | 3.3173853  |
| H | -3.3363421 | 1.0233481  | 2.1160002  |
| N | -1.1849706 | 1.3599515  | 1.0528595  |
| C | 0.1173208  | 1.3641568  | 0.6685268  |
| H | 0.1673310  | 2.7981964  | -0.9005129 |
| N | -1.7978449 | -0.3941220 | -1.8999557 |
| C | -1.7594635 | -1.4472816 | -1.0470344 |
| H | -2.7052427 | -1.7863075 | -0.6388070 |
| C | -0.5671651 | -2.0164062 | -0.7303105 |
| H | -0.5061572 | -2.8525294 | -0.0460967 |
| C | 0.5995081  | -1.4374699 | -1.3348979 |
| N | 1.8251358  | -1.9633890 | -1.0575857 |
| H | 2.6023355  | -1.3569674 | -1.2919962 |
| H | 1.9322486  | -2.4588079 | -0.1810314 |
| N | 0.5607807  | -0.4070452 | -2.1732507 |
| C | -0.6278243 | 0.2048840  | -2.4511382 |
| O | -0.7595314 | 1.2393929  | -3.1032192 |
| H | -2.6644943 | 0.0898330  | -2.0980267 |

29

G17C2B ST

|   |            |            |            |
|---|------------|------------|------------|
| N | 0.1894604  | 1.5871339  | -0.5617133 |
| C | 0.5204165  | 0.8417635  | -1.6522322 |
| N | 1.7486332  | 0.8604981  | -2.2795748 |
| C | 1.6434239  | -0.0434118 | -3.2423390 |
| H | 2.4226745  | -0.2889818 | -3.9499961 |
| N | 0.4269631  | -0.6589757 | -3.2737732 |
| H | 0.1108575  | -1.3700722 | -3.9191968 |
| C | -0.3142769 | -0.1023309 | -2.2523783 |
| C | -1.6139832 | -0.4109084 | -1.7592591 |
| O | -2.4279160 | -1.2458041 | -2.1493701 |
| N | -1.8841831 | 0.4258026  | -0.6451436 |
| H | -2.7899951 | 0.2738217  | -0.2134915 |
| C | -1.0072194 | 1.3328400  | -0.0886826 |
| N | -1.4701324 | 2.0364626  | 1.0023986  |
| H | -2.0499044 | 1.5233110  | 1.6579153  |
| H | -0.7205782 | 2.5394497  | 1.4629715  |
| N | -0.8975150 | -1.1293160 | 2.4212415  |
| C | -0.4223999 | -1.7852864 | 1.3413660  |
| H | -1.0902277 | -2.5258203 | 0.9079823  |
| C | 0.8118415  | -1.5423381 | 0.7740240  |
| H | 1.1463335  | -2.0798890 | -0.1054561 |
| C | 1.5904126  | -0.5237240 | 1.3645091  |
| N | 2.8020822  | -0.1431002 | 0.8646419  |
| H | 3.1295661  | 0.7541009  | 1.2003641  |
| H | 2.9528265  | -0.2894686 | -0.1257768 |
| N | 1.1634208  | 0.1123291  | 2.4715605  |
| C | -0.0416102 | -0.2417409 | 2.9221788  |
| O | -0.4798605 | 0.4266499  | 4.0210197  |
| H | 0.2558823  | 1.0099933  | 4.2776510  |

29

G91C1 ST

|   |            |            |            |
|---|------------|------------|------------|
| N | -0.7385024 | -0.9984888 | -1.4531364 |
| C | 0.5185870  | -0.6541298 | -1.1646814 |
| N | 1.3027596  | 0.3187450  | -1.7380187 |
| H | 0.9904135  | 1.0302393  | -2.3869229 |
| C | 2.4985704  | 0.3289421  | -1.0451873 |

|   |            |            |            |
|---|------------|------------|------------|
| H | 3.2721964  | 1.0437539  | -1.2843814 |
| N | 2.5626624  | -0.5784667 | -0.0963701 |
| C | 1.3248757  | -1.2035329 | -0.1583464 |
| C | 0.7226822  | -2.2007256 | 0.6179613  |
| O | 1.3661306  | -2.8193997 | 1.6342450  |
| H | 2.2747722  | -2.4692045 | 1.6535936  |
| N | -0.5312833 | -2.5635849 | 0.3944600  |
| C | -1.1908566 | -1.9445558 | -0.6135938 |
| N | -2.5231621 | -2.2956050 | -0.7466238 |
| H | -2.7584507 | -3.1918631 | -0.3398520 |
| H | -2.9089784 | -2.1290254 | -1.6671793 |
| N | 0.6951722  | 1.9841375  | 1.2956494  |
| C | -0.0291293 | 1.0466295  | 1.9561334  |
| H | 0.4430109  | 0.5682507  | 2.8070391  |
| C | -1.2817832 | 0.7362900  | 1.5308805  |
| H | -1.8717971 | -0.0193719 | 2.0312462  |
| C | -1.7429590 | 1.4231388  | 0.3609618  |
| N | -2.9973662 | 1.1643093  | -0.1108632 |
| H | -3.1737747 | 1.5081138  | -1.0463947 |
| H | -3.3992763 | 0.2614307  | 0.1058251  |
| N | -1.0242497 | 2.3178063  | -0.3065413 |
| C | 0.2442626  | 2.6197124  | 0.1023161  |
| O | 1.0286633  | 3.3522271  | -0.4975583 |
| H | 1.6547835  | 2.1799693  | 1.5530560  |

29

G91C2A ST

|   |            |            |            |
|---|------------|------------|------------|
| N | -1.3534444 | -1.0692757 | 1.2168413  |
| C | -1.3594718 | -0.6787154 | -0.0573254 |
| N | -2.1265120 | 0.2893550  | -0.6654473 |
| H | -2.7676371 | 0.9190061  | -0.2036518 |
| C | -1.7220768 | 0.3545417  | -1.9865276 |
| H | -2.1553724 | 1.0710362  | -2.6685630 |
| N | -0.7824358 | -0.5109327 | -2.2878645 |
| C | -0.5438657 | -1.1645567 | -1.0871205 |
| C | 0.3879853  | -2.1345942 | -0.7039566 |
| O | 1.2737597  | -2.6695919 | -1.5831724 |
| H | 1.0536014  | -2.3034386 | -2.4587674 |
| N | 0.4621254  | -2.5455521 | 0.5496836  |
| C | -0.4051218 | -1.9976081 | 1.4408320  |
| N | -0.2471246 | -2.4146803 | 2.7387773  |
| H | 0.2500293  | -3.2841793 | 2.8668340  |
| H | -1.0196870 | -2.2309169 | 3.3625979  |
| N | 0.0650919  | 2.2215701  | 1.6832751  |
| C | 0.9578713  | 1.2376977  | 1.9030272  |
| H | 1.0251215  | 0.8727082  | 2.9235860  |
| C | 1.7378680  | 0.6854102  | 0.9073825  |
| H | 2.4251592  | -0.1268710 | 1.1123750  |
| C | 1.5483177  | 1.1936991  | -0.3946129 |
| N | 2.2640468  | 0.7403648  | -1.4699667 |
| H | 1.8495736  | 0.9496246  | -2.3702570 |
| H | 2.6911844  | -0.1729051 | -1.3908642 |
| N | 0.6623930  | 2.1755413  | -0.6461455 |
| C | -0.0110397 | 2.6170520  | 0.4098765  |
| O | -0.9223104 | 3.5900341  | 0.1418361  |
| H | -1.2944207 | 3.8248687  | 1.0104610  |

29

G91C2B ST

|   |            |           |            |
|---|------------|-----------|------------|
| N | -1.3156093 | 1.7187489 | 0.0586444  |
| C | -0.6724336 | 1.1151039 | -0.9425899 |
| N | 0.3362147  | 1.6022113 | -1.7409584 |
| H | 0.8355076  | 2.4703981 | -1.6021811 |
| C | 0.6880909  | 0.5839421 | -2.6094107 |
| H | 1.4849446  | 0.7156907 | -3.3266507 |



|   |            |            |            |
|---|------------|------------|------------|
| N | -0.0231252 | -0.5072733 | -2.4513073 |
| C | -0.8777049 | -0.1913073 | -1.4052940 |
| C | -1.8222317 | -0.9359847 | -0.6927537 |
| O | -2.0897188 | -2.2323967 | -0.9802683 |
| H | -1.5445996 | -2.4688492 | -1.7523410 |
| N | -2.4725189 | -0.4031924 | 0.3304088  |
| C | -2.1965109 | 0.8888231  | 0.6452560  |
| N | -2.8666866 | 1.3760158  | 1.7437798  |
| H | -3.7205153 | 0.8912673  | 1.9828204  |
| H | -2.8814447 | 2.3822930  | 1.8337867  |
| N | 2.4724902  | 1.0674575  | 0.7965782  |
| C | 1.5832969  | 1.1729671  | 1.8034092  |
| H | 1.5334619  | 2.1446073  | 2.2883299  |
| C | 0.7515437  | 0.1490890  | 2.2115502  |
| H | 0.0264785  | 0.2921931  | 3.0039503  |
| C | 0.8532375  | -1.0628507 | 1.5020435  |
| N | 0.0705033  | -2.1504768 | 1.7902575  |
| H | 0.0540765  | -2.8624550 | 1.0699236  |
| H | -0.8361836 | -1.9552098 | 2.1958252  |
| N | 1.7561827  | -1.2118975 | 0.5166562  |
| C | 2.4992968  | -0.1389296 | 0.2335087  |
| O | 3.3851432  | -0.2862446 | -0.7827810 |
| H | 3.2578902  | -1.1966442 | -1.1030887 |

29

G92C1 ST

|   |            |            |            |
|---|------------|------------|------------|
| N | 0.9361192  | 1.2226786  | -1.3300852 |
| C | 0.6182806  | -0.0751867 | -1.3495900 |
| N | -0.3074996 | -0.7072949 | -2.1413163 |
| H | -1.0080611 | -0.2527270 | -2.7140467 |
| C | -0.3246200 | -2.0321827 | -1.7468701 |
| H | -1.0116110 | -2.7350751 | -2.1951070 |
| N | 0.5456705  | -2.3178518 | -0.8089332 |
| C | 1.1501883  | -1.0974945 | -0.5394376 |
| C | 2.1023999  | -0.6598781 | 0.3852287  |
| O | 2.6714850  | -1.5118953 | 1.2675461  |
| H | 3.3027311  | -0.9720610 | 1.7784067  |
| N | 2.4616318  | 0.6192410  | 0.4463755  |
| C | 1.8645068  | 1.4921097  | -0.4005224 |
| N | 2.2156201  | 2.8166555  | -0.2377632 |
| H | 3.1029717  | 2.9715689  | 0.2211082  |
| H | 2.0304614  | 3.4064170  | -1.0381235 |
| N | -1.9787857 | 1.7241080  | 0.3555750  |
| C | -1.0879869 | 1.7424489  | 1.3765814  |
| H | -0.6743757 | 2.7050414  | 1.6544057  |
| C | -0.7339561 | 0.5795235  | 1.9841621  |
| H | -0.0137496 | 0.5680854  | 2.7915462  |
| C | -1.3308393 | -0.6172260 | 1.4684205  |
| N | -1.0196556 | -1.8210790 | 2.0327089  |
| H | -1.2377883 | -2.6231538 | 1.4535444  |
| H | -0.1429640 | -1.8884741 | 2.5319491  |
| N | -2.1916277 | -0.6375702 | 0.4581400  |
| C | -2.5149598 | 0.5225525  | -0.1873233 |
| O | -3.1934656 | 0.5981676  | -1.2105407 |
| H | -2.1917682 | 2.5648066  | -0.1665910 |

29

G92C2A ST

|   |            |            |            |
|---|------------|------------|------------|
| N | -1.6061074 | -0.2555032 | 0.8624276  |
| C | -1.2876852 | -0.8910360 | -0.2642305 |
| N | -1.8932509 | -0.7793703 | -1.4927112 |
| H | -2.6562714 | -0.1567110 | -1.7194973 |
| C | -1.1830753 | -1.5880981 | -2.3643409 |
| H | -1.4586144 | -1.6642190 | -3.4069191 |
| N | -0.1902585 | -2.2266500 | -1.7959605 |

|   |            |            |            |
|---|------------|------------|------------|
| C | -0.2391176 | -1.8070887 | -0.4727597 |
| C | 0.5243672  | -2.0669369 | 0.6709073  |
| O | 1.5654608  | -2.9295652 | 0.6422899  |
| H | 1.9007861  | -2.9577057 | 1.5576627  |
| N | 0.2698598  | -1.4478962 | 1.8167865  |
| C | -0.7622992 | -0.5648988 | 1.8609849  |
| N | -0.9710725 | 0.0531742  | 3.0669651  |
| H | -0.1718142 | 0.0450227  | 3.6857365  |
| H | -1.4496130 | 0.9427257  | 3.0029160  |
| N | -0.5442318 | 2.6240166  | -1.0078154 |
| C | 0.0788515  | 1.9439562  | -1.9896967 |
| H | -0.3346656 | 2.0645988  | -2.9883431 |
| C | 1.1714094  | 1.1291018  | -1.7771124 |
| H | 1.6324602  | 0.5732448  | -2.5846877 |
| C | 1.6353364  | 1.0380711  | -0.4475312 |
| N | 2.7239437  | 0.2832656  | -0.1052230 |
| H | 2.8143723  | 0.0988512  | 0.8861098  |
| H | 2.9651698  | -0.4888570 | -0.7116754 |
| N | 1.0479526  | 1.7191614  | 0.5513129  |
| C | -0.0045814 | 2.4513749  | 0.2037949  |
| O | -0.6154510 | 3.0951129  | 1.2283723  |
| H | -1.3619989 | 3.5663048  | 0.8180942  |

29

G92C2B ST

|   |            |            |            |
|---|------------|------------|------------|
| N | -1.0649477 | 1.7517858  | -0.3007273 |
| C | -0.6060150 | 0.9006596  | -1.2220231 |
| N | 0.2773163  | 1.1330819  | -2.2512321 |
| H | 0.8296652  | 1.9708718  | -2.3753488 |
| C | 0.4742271  | -0.0770157 | -2.8909575 |
| H | 1.1596406  | -0.1643065 | -3.7213144 |
| N | -0.2346861 | -1.0580724 | -2.3840748 |
| C | -0.9133012 | -0.4612923 | -1.3328117 |
| C | -1.7784394 | -0.9627984 | -0.3548312 |
| O | -2.1483218 | -2.2638030 | -0.3092295 |
| H | -1.7158535 | -2.7076927 | -1.0606593 |
| N | -2.2535546 | -0.1717889 | 0.5937098  |
| C | -1.8694081 | 1.1294677  | 0.5787132  |
| N | -2.3249259 | 1.8767697  | 1.6434122  |
| H | -3.1683670 | 1.5300602  | 2.0794201  |
| H | -2.2697531 | 2.8789465  | 1.5233935  |
| N | 2.5793832  | -0.2610152 | -0.3015394 |
| C | 2.2106996  | -1.5150986 | 0.0233066  |
| H | 2.6118222  | -2.3025345 | -0.6095727 |
| C | 1.3596925  | -1.8240898 | 1.0672754  |
| H | 1.0676406  | -2.8468449 | 1.2765577  |
| C | 0.8753682  | -0.7398558 | 1.8270843  |
| N | 0.0262006  | -0.8966381 | 2.8903483  |
| H | -0.4770213 | -0.0535904 | 3.1428993  |
| H | -0.5438373 | -1.7318192 | 2.8896516  |
| N | 1.2523411  | 0.5186728  | 1.5467443  |
| C | 2.0572412  | 0.6698650  | 0.4929796  |
| O | 2.3569315  | 1.9520200  | 0.1635986  |
| H | 1.8446461  | 2.4981440  | 0.7864148  |

29

G19C2A TS

|   |            |           |            |
|---|------------|-----------|------------|
| N | -0.5789221 | 4.0976801 | 0.9798766  |
| C | -0.6667281 | 4.6241593 | -0.2980519 |
| H | -0.9948045 | 5.6400314 | -0.4662032 |
| N | -0.3174218 | 3.7700103 | -1.2272640 |
| C | 0.0206504  | 2.6221831 | -0.5308628 |
| C | 0.4701409  | 1.3468215 | -0.9988534 |
| O | 0.6703196  | 0.9258134 | -2.1390342 |
| N | 0.7017529  | 0.4805567 | 0.1137251  |

|   |            |            |            |
|---|------------|------------|------------|
| H | 1.0352710  | -0.4458883 | -0.1527184 |
| C | 0.4922831  | 0.7625295  | 1.4378346  |
| N | 0.8043800  | -0.2150212 | 2.3459900  |
| H | 0.7712908  | -1.1909049 | 2.0650226  |
| H | 0.4716790  | -0.0241519 | 3.2814743  |
| N | 0.0638416  | 1.9344676  | 1.8660888  |
| C | -0.1371782 | 2.8051206  | 0.8489965  |
| H | -0.7953925 | 4.5625008  | 1.8510744  |
| N | 0.5928523  | -3.3077665 | 0.9901162  |
| C | 1.4878484  | -2.9238034 | 0.0524400  |
| H | 2.5343804  | -3.0077299 | 0.3346720  |
| C | 1.1273307  | -2.4192733 | -1.1792895 |
| H | 1.8644804  | -2.1006955 | -1.9061552 |
| C | -0.2652118 | -2.2933961 | -1.4291100 |
| N | -0.7330228 | -1.7060330 | -2.5600423 |
| H | -1.7274464 | -1.5125550 | -2.5542824 |
| H | -0.1535727 | -0.9651898 | -2.9479457 |
| N | -1.1743495 | -2.7566796 | -0.5509846 |
| C | -0.6873157 | -3.2432897 | 0.5830765  |
| O | -1.6115441 | -3.7038250 | 1.4536041  |
| H | -1.1076163 | -4.0475475 | 2.2123696  |

29

G19C2B TS

|   |            |            |            |
|---|------------|------------|------------|
| N | -1.8736635 | 0.3851678  | 2.0958618  |
| C | -2.2978883 | 1.6513661  | 1.7418966  |
| H | -2.5177356 | 2.4026974  | 2.4863610  |
| N | -2.3981250 | 1.8082608  | 0.4426129  |
| C | -2.0217612 | 0.5826715  | -0.0826314 |
| C | -1.8708822 | 0.1729873  | -1.4489086 |
| O | -2.0707041 | 0.7626754  | -2.4994014 |
| N | -1.3815020 | -1.1827667 | -1.4856133 |
| H | -1.2827667 | -1.5495664 | -2.4266310 |
| C | -1.0215478 | -1.9519513 | -0.4161832 |
| N | -0.5241179 | -3.2063803 | -0.6699156 |
| H | 0.0092299  | -3.3279032 | -1.5217719 |
| H | -0.0787579 | -3.6254555 | 0.1380043  |
| N | -1.1593174 | -1.5602858 | 0.8381699  |
| C | -1.6768224 | -0.3087156 | 0.9323594  |
| H | -1.6836346 | 0.0447228  | 3.0287768  |
| N | 3.4623457  | -0.6708811 | 0.1976618  |
| C | 3.8722936  | 0.4231309  | -0.4721498 |
| H | 4.9020973  | 0.4014529  | -0.8224555 |
| C | 3.0748981  | 1.5224956  | -0.7288532 |
| H | 3.4503216  | 2.3793755  | -1.2771349 |
| C | 1.7551944  | 1.4723209  | -0.2299071 |
| N | 0.8799300  | 2.5086113  | -0.3639347 |
| H | -0.0981493 | 2.3391084  | -0.1581485 |
| H | 1.0724719  | 3.2156257  | -1.0572444 |
| N | 1.3200013  | 0.3940178  | 0.4474139  |
| C | 2.1960471  | -0.6049158 | 0.6093688  |
| O | 1.7415605  | -1.6952020 | 1.2686857  |
| H | 0.7735077  | -1.5617913 | 1.4021178  |

29

G17C2A TS

|   |            |            |            |
|---|------------|------------|------------|
| N | -1.4960858 | -1.1870019 | 0.1924686  |
| C | -0.5540232 | -2.0377077 | 0.6961833  |
| N | -0.5316875 | -2.5059787 | 1.9895092  |
| C | 0.5581724  | -3.2553769 | 2.0496888  |
| H | 0.8933469  | -3.7938920 | 2.9247282  |
| N | 1.2499769  | -3.2971153 | 0.8749094  |
| H | 2.1044588  | -3.8002038 | 0.6787082  |
| C | 0.5481627  | -2.5108556 | -0.0151298 |
| C | 0.8089219  | -2.1504514 | -1.3688671 |

|   |            |            |            |
|---|------------|------------|------------|
| O | 1.7343609  | -2.4742362 | -2.1093631 |
| N | -0.2300232 | -1.2873578 | -1.8125819 |
| H | -0.1532559 | -0.9949422 | -2.7811962 |
| C | -1.2929346 | -0.8429648 | -1.0599934 |
| N | -2.2009125 | -0.0357379 | -1.7093024 |
| H | -1.7758678 | 0.6909794  | -2.2790340 |
| H | -2.8407883 | 0.3788518  | -1.0398327 |
| N | 1.1073072  | 3.7766857  | -0.3109278 |
| C | 1.2279481  | 3.8335004  | 1.0323024  |
| H | 1.9065838  | 4.5921055  | 1.4146368  |
| C | 0.5519828  | 2.9971068  | 1.8961401  |
| H | 0.6809765  | 3.0721400  | 2.9699633  |
| C | -0.3098782 | 2.0382674  | 1.3127651  |
| N | -1.0629440 | 1.1739753  | 2.0390165  |
| H | -1.4548812 | 0.3708686  | 1.5395808  |
| H | -0.8422513 | 1.0392085  | 3.0144337  |
| N | -0.4459791 | 1.9640369  | -0.0278589 |
| C | 0.2701389  | 2.8270014  | -0.7336156 |
| O | 0.1181159  | 2.7120815  | -2.0825091 |
| H | 0.6964254  | 3.3960698  | -2.4639485 |

29

G17C2B TS

|   |            |            |            |
|---|------------|------------|------------|
| N | -0.2820271 | -0.5329509 | 0.3257632  |
| C | 0.6886108  | -0.2869381 | 1.2441843  |
| N | 2.0463360  | -0.3324753 | 0.9956937  |
| C | 2.6053544  | -0.0241330 | 2.1559414  |
| H | 3.6696748  | 0.0318784  | 2.3365778  |
| N | 1.7004832  | 0.2241385  | 3.1444908  |
| H | 1.8893800  | 0.4704397  | 4.1063245  |
| C | 0.4532329  | 0.0621762  | 2.5757304  |
| C | -0.8561611 | 0.1873811  | 3.1206348  |
| O | -1.2143824 | 0.4764552  | 4.2613226  |
| N | -1.8028837 | -0.0918574 | 2.0967579  |
| H | -2.7679822 | -0.0766207 | 2.4093969  |
| C | -1.5071057 | -0.4325946 | 0.7881962  |
| N | -2.5664732 | -0.7279980 | -0.0302970 |
| H | -3.4446602 | -0.2601504 | 0.1529210  |
| H | -2.3196793 | -0.7674896 | -1.0245538 |
| N | -1.2684216 | -0.5635397 | -2.7941201 |
| C | -0.2839112 | -1.4872536 | -2.8427262 |
| H | -0.6102422 | -2.5149217 | -2.9785901 |
| C | 1.0517538  | -1.1892082 | -2.6983071 |
| H | 1.8101890  | -1.9628212 | -2.7099701 |
| C | 1.3744280  | 0.1631804  | -2.4678439 |
| N | 2.6601201  | 0.5797359  | -2.2479655 |
| H | 2.7216188  | 1.5048830  | -1.8400896 |
| H | 3.2606584  | -0.0982067 | -1.7961289 |
| N | 0.4251452  | 1.1139435  | -2.4818661 |
| C | -0.8260528 | 0.6832689  | -2.6336852 |
| O | -1.7932833 | 1.6337477  | -2.5858713 |
| H | -1.3210377 | 2.4722294  | -2.4407376 |

29

G91C1 TS

|   |            |            |            |
|---|------------|------------|------------|
| N | 0.3612519  | 0.4506188  | -0.6897943 |
| C | 1.0976802  | -0.6034915 | -0.3118490 |
| N | 0.7314506  | -1.9219185 | -0.2077448 |
| H | -0.2220241 | -2.2917035 | -0.3387879 |
| C | 1.8463380  | -2.6025983 | 0.2319153  |
| H | 1.8148703  | -3.6691210 | 0.4049305  |
| N | 2.9055285  | -1.8399094 | 0.4061705  |
| C | 2.4466650  | -0.5753341 | 0.0702478  |
| C | 3.0573479  | 0.6839590  | 0.0474892  |
| O | 4.3581692  | 0.8659585  | 0.3724222  |

|   |            |            |            |
|---|------------|------------|------------|
| H | 4.7177284  | -0.0113318 | 0.5956148  |
| N | 2.3687465  | 1.7625810  | -0.2969795 |
| C | 1.0675528  | 1.5908264  | -0.6350891 |
| N | 0.3746453  | 2.7574212  | -0.9086810 |
| H | 0.9604114  | 3.5356216  | -1.1814998 |
| H | -0.4613952 | 2.6271071  | -1.4623750 |
| N | -3.1550826 | -0.4288842 | -1.1538925 |
| C | -3.4540079 | 0.8699744  | -0.9025940 |
| H | -3.9865911 | 1.4103376  | -1.6771905 |
| C | -3.0831504 | 1.4337485  | 0.2765262  |
| H | -3.3076075 | 2.4691229  | 0.4971596  |
| C | -2.3952139 | 0.5806413  | 1.2001060  |
| N | -2.0260420 | 1.0634281  | 2.4164405  |
| H | -1.3953497 | 0.4862516  | 2.9563056  |
| H | -1.9839145 | 2.0603898  | 2.5654043  |
| N | -2.1143882 | -0.6931854 | 0.9567305  |
| C | -2.4078683 | -1.2266468 | -0.2568733 |
| O | -2.0487180 | -2.3494848 | -0.6386883 |
| H | -3.3540391 | -0.8515520 | -2.0523292 |

29

G91C2A TS

|   |            |            |            |
|---|------------|------------|------------|
| N | 0.0113177  | 4.1726862  | 0.4727393  |
| C | 0.8319974  | 3.1372201  | 0.2965473  |
| N | 2.1738073  | 3.0609266  | 0.6001470  |
| H | 2.7340482  | 3.7966449  | 1.0077758  |
| C | 2.5985517  | 1.7945417  | 0.2464552  |
| H | 3.6223582  | 1.4799959  | 0.3884374  |
| N | 1.6416390  | 1.0549158  | -0.2604788 |
| C | 0.5219806  | 1.8767024  | -0.2394961 |
| C | -0.8190083 | 1.7183082  | -0.6172446 |
| O | -1.2546906 | 0.5591571  | -1.1397012 |
| H | -2.2080764 | 0.6729762  | -1.3086756 |
| N | -1.6851142 | 2.7121366  | -0.4647999 |
| C | -1.2392203 | 3.8826686  | 0.0643672  |
| N | -2.1713431 | 4.8635414  | 0.1886979  |
| H | -3.1210080 | 4.6873602  | -0.0930913 |
| H | -1.9089464 | 5.7503165  | 0.5857516  |
| N | -0.9962873 | -4.2742611 | 1.1886231  |
| C | -0.7165028 | -3.0218759 | 1.6053236  |
| H | -1.1820695 | -2.7197639 | 2.5410885  |
| C | 0.1000685  | -2.1524298 | 0.9151788  |
| H | 0.3025005  | -1.1497956 | 1.2716288  |
| C | 0.6574622  | -2.6330942 | -0.2945778 |
| N | 1.5001579  | -1.8845503 | -1.0461879 |
| H | 1.7302947  | -2.2476662 | -1.9600549 |
| H | 1.5885896  | -0.8820341 | -0.8726041 |
| N | 0.3905486  | -3.8784597 | -0.7397270 |
| C | -0.4097327 | -4.6047184 | 0.0312176  |
| O | -0.6665680 | -5.8562385 | -0.4276238 |
| H | -1.2572215 | -6.2469242 | 0.2402312  |

29

G91C2B TS

|   |            |            |            |
|---|------------|------------|------------|
| N | 0.6404487  | -0.0204273 | 0.5143662  |
| C | -0.4587146 | -0.1084551 | 1.2734223  |
| N | -1.7700697 | -0.2088838 | 0.8781348  |
| H | -2.0772999 | -0.2374387 | -0.1025869 |
| C | -2.5252740 | -0.2597375 | 2.0320805  |
| H | -3.6026106 | -0.3390398 | 1.9924004  |
| N | -1.8120801 | -0.2033243 | 3.1365903  |
| C | -0.5076738 | -0.1081869 | 2.6743879  |
| C | 0.7303962  | -0.0010057 | 3.3206036  |
| O | 0.8466052  | 0.0271207  | 4.6682370  |
| H | -0.0545248 | -0.0402681 | 5.0316212  |

|   |            |            |            |
|---|------------|------------|------------|
| N | 1.8510392  | 0.0850325  | 2.6206027  |
| C | 1.7502967  | 0.0651478  | 1.2680618  |
| N | 2.9513468  | 0.0991582  | 0.5914137  |
| H | 3.7319264  | 0.4564975  | 1.1246190  |
| H | 2.8927179  | 0.4001196  | -0.3714454 |
| N | -1.5855608 | -0.3198753 | -2.0123436 |
| C | -1.0385746 | -1.4463391 | -2.5110196 |
| H | -1.5494005 | -2.3714393 | -2.2576830 |
| C | 0.1007750  | -1.4651308 | -3.2862905 |
| H | 0.5112305  | -2.3930548 | -3.6669431 |
| C | 0.7047013  | -0.2169025 | -3.5450736 |
| N | 1.8201291  | -0.0915952 | -4.3195048 |
| H | 2.2795214  | 0.8079194  | -4.3280742 |
| H | 2.3802793  | -0.9045882 | -4.5239314 |
| N | 0.1814907  | 0.9231002  | -3.0632204 |
| C | -0.9210250 | 0.7941960  | -2.3255501 |
| O | -1.4453544 | 1.9286859  | -1.8162075 |
| H | -0.8458450 | 2.6465341  | -2.0841985 |

29

G92C1 TS

|   |            |            |            |
|---|------------|------------|------------|
| N | -0.4402712 | 0.3775660  | 0.6444886  |
| C | 0.6098464  | 1.1265886  | 0.2764412  |
| N | 1.9209726  | 0.7468314  | 0.1712976  |
| H | 2.2804391  | -0.2100250 | 0.3015974  |
| C | 2.6142880  | 1.8632845  | -0.2479145 |
| H | 3.6814219  | 1.8228887  | -0.4165558 |
| N | 1.8679747  | 2.9323202  | -0.4102154 |
| C | 0.5936992  | 2.4890490  | -0.0865843 |
| C | -0.6712310 | 3.0854783  | -0.0441160 |
| O | -0.8502101 | 4.3885123  | -0.3436008 |
| H | -1.8062815 | 4.5490497  | -0.2410138 |
| N | -1.7492083 | 2.3785138  | 0.2952894  |
| C | -1.5834226 | 1.0719817  | 0.6090368  |
| N | -2.7477167 | 0.3680475  | 0.8728643  |
| H | -3.5229670 | 0.9400982  | 1.1810118  |
| H | -2.6037505 | -0.4804498 | 1.4046014  |
| N | 0.4434900  | -3.1389443 | 1.1854066  |
| C | -0.8538552 | -3.4563787 | 0.9513565  |
| H | -1.3831706 | -3.9759292 | 1.7423414  |
| C | -1.4296182 | -3.1201692 | -0.2326556 |
| H | -2.4635066 | -3.3630901 | -0.4412901 |
| C | -0.5888127 | -2.4483620 | -1.1799390 |
| N | -1.0826726 | -2.1178871 | -2.4032143 |
| H | -0.5140303 | -1.4978311 | -2.9641135 |
| H | -2.0807532 | -2.0884163 | -2.5470010 |
| N | 0.6831888  | -2.1484212 | -0.9524651 |
| C | 1.2289316  | -2.4076851 | 0.2635889  |
| O | 2.3519442  | -2.0331479 | 0.6271691  |
| H | 0.8756079  | -3.3137548 | 2.0843330  |

29

G92C2A TS

|   |            |            |           |
|---|------------|------------|-----------|
| N | 0.1467507  | 1.5832874  | 1.8673790 |
| C | -0.6837055 | 0.5474522  | 1.9720943 |
| N | -2.0300743 | 0.5484894  | 2.2520499 |
| H | -2.6127236 | 1.3669287  | 2.3577987 |
| C | -2.4472947 | -0.7723808 | 2.2376327 |
| H | -3.4796323 | -1.0358968 | 2.4191028 |
| N | -1.4781330 | -1.6211664 | 1.9922701 |
| C | -0.3661366 | -0.8090097 | 1.8234967 |
| C | 0.9632006  | -1.0767083 | 1.4904151 |
| O | 1.4256931  | -2.3297793 | 1.2729816 |
| H | 0.6716487  | -2.9351258 | 1.3877575 |
| N | 1.8339011  | -0.0893401 | 1.3387058 |

|   |            |            |            |
|---|------------|------------|------------|
| C | 1.3854711  | 1.1831870  | 1.5329832  |
| N | 2.3174324  | 2.1573104  | 1.3469837  |
| H | 3.2796625  | 1.9011950  | 1.2033717  |
| H | 2.0643538  | 3.1164960  | 1.5167657  |
| N | -1.5371161 | 0.2610831  | -3.2105317 |
| C | -0.5943843 | -0.3019441 | -3.9921636 |
| H | -0.8970534 | -0.5300932 | -5.0114055 |
| C | 0.6837972  | -0.5851307 | -3.5580090 |
| H | 1.4173252  | -1.0371675 | -4.2164465 |
| C | 0.9881158  | -0.2511238 | -2.2170404 |
| N | 2.2220296  | -0.4449686 | -1.6792693 |
| H | 2.3080341  | -0.3649596 | -0.6647863 |
| H | 2.8591346  | -1.0691328 | -2.1500907 |
| N | 0.0638641  | 0.3121995  | -1.4140887 |
| C | -1.1244936 | 0.5237586  | -1.9652226 |
| O | -2.0494565 | 1.0809800  | -1.1414076 |
| H | -2.8459311 | 1.1684931  | -1.6945892 |

29

G92C2B TS

|   |            |            |            |
|---|------------|------------|------------|
| N | -0.4914272 | 1.2968325  | -1.5851613 |
| C | -1.0469660 | 1.5322779  | -0.3917777 |
| N | -2.3708946 | 1.4641925  | -0.0316505 |
| H | -3.1369593 | 1.1792776  | -0.6270230 |
| C | -2.4315444 | 1.7306298  | 1.3275816  |
| H | -3.3742389 | 1.7307637  | 1.8559340  |
| N | -1.2584201 | 1.9725364  | 1.8613528  |
| C | -0.3798296 | 1.8490714  | 0.7956101  |
| C | 1.0158722  | 1.8803294  | 0.7074143  |
| O | 1.8071777  | 2.0983902  | 1.7811257  |
| H | 1.2214523  | 2.2298632  | 2.5484421  |
| N | 1.6271813  | 1.6531311  | -0.4447410 |
| C | 0.8547429  | 1.3856006  | -1.5286100 |
| N | 1.5325160  | 1.2081009  | -2.6999471 |
| H | 2.5190439  | 1.0095032  | -2.6192610 |
| H | 1.0322097  | 0.7564945  | -3.4517924 |
| N | -1.2637937 | -3.1317022 | -0.1051916 |
| C | -0.4618094 | -3.6718429 | 0.8308557  |
| H | -0.8402335 | -4.5719423 | 1.3107841  |
| C | 0.7669067  | -3.1538045 | 1.2003984  |
| H | 1.3728262  | -3.6234291 | 1.9672032  |
| C | 1.1810113  | -1.9880002 | 0.5241345  |
| N | 2.3812483  | -1.3754525 | 0.7512568  |
| H | 2.4862031  | -0.4367115 | 0.3797020  |
| H | 2.8730164  | -1.5798694 | 1.6081346  |
| N | 0.4087292  | -1.4370013 | -0.4259755 |
| C | -0.7630919 | -2.0323446 | -0.6715056 |
| O | -1.5451109 | -1.4443527 | -1.6027350 |
| H | -1.0957366 | -0.6024730 | -1.8567694 |

32

G19C1W1 HB

|   |            |            |            |
|---|------------|------------|------------|
| O | -1.6806704 | -0.0489708 | 0.8091566  |
| C | -0.5305550 | -0.0339146 | 1.2957624  |
| C | -0.1414108 | 0.0023571  | 2.6654568  |
| N | -0.8952322 | 0.0343611  | 3.8291864  |
| C | -0.0114853 | 0.0677823  | 4.7946962  |
| H | -0.2349183 | 0.0999982  | 5.8511888  |
| N | 1.2912671  | 0.0581859  | 4.3283508  |
| H | 2.1376670  | 0.0771167  | 4.8804317  |
| C | 1.2287503  | 0.0158443  | 2.9555086  |
| N | 2.2796241  | -0.0060964 | 2.1153642  |
| C | 1.9013594  | -0.0447842 | 0.8409291  |
| N | 2.8335335  | -0.0951485 | -0.1321415 |
| H | 3.7951779  | -0.0285637 | 0.1617951  |

|   |            |            |            |
|---|------------|------------|------------|
| H | 2.6019443  | -0.0437515 | -1.1318924 |
| N | 0.5838857  | -0.0523065 | 0.4431621  |
| H | 0.3681615  | -0.0608167 | -0.5770549 |
| C | 0.9643105  | 0.0232949  | -3.2534931 |
| O | 2.1597630  | 0.0296655  | -2.9300892 |
| N | 0.6451513  | 0.0634515  | -4.6277023 |
| H | 1.4325668  | 0.0927467  | -5.2626965 |
| C | -0.6369223 | 0.0614122  | -5.0820492 |
| H | -0.7737281 | 0.0925871  | -6.1570488 |
| C | -1.6715710 | 0.0204373  | -4.2053997 |
| H | -2.6967419 | 0.0174930  | -4.5530242 |
| C | -1.3437804 | -0.0191194 | -2.8049167 |
| N | -2.3030373 | -0.0589413 | -1.8749269 |
| H | -2.0630826 | -0.0678728 | -0.8603207 |
| H | -3.2727192 | -0.0524844 | -2.1528910 |
| N | -0.0696402 | -0.0182284 | -2.3766373 |
| O | -3.7993301 | 0.0060839  | 2.9852210  |
| H | -3.0165812 | 0.0274577  | 3.5674864  |
| H | -3.3640295 | -0.0176046 | 2.1153742  |

32

G19C2AW1 HB

|   |            |            |            |
|---|------------|------------|------------|
| C | -1.8394624 | -1.2404454 | -0.0654969 |
| N | -2.8834122 | -0.3787031 | -0.1458343 |
| H | -2.7604562 | 0.6246811  | -0.0569843 |
| H | -3.7990914 | -0.7730858 | 0.0026998  |
| N | -0.5767114 | -0.7006554 | -0.1013723 |
| H | -0.4686326 | 0.3323302  | -0.1278878 |
| C | 0.6269969  | -1.4368066 | -0.0764371 |
| O | 1.7112278  | -0.8295516 | -0.1218338 |
| C | 0.3829402  | -2.8371856 | 0.0001301  |
| C | -0.9481049 | -3.2696129 | 0.0402954  |
| N | -2.0822814 | -2.5413140 | 0.0117104  |
| N | -0.8657723 | -4.6375890 | 0.1158972  |
| H | -1.6483602 | -5.2757863 | 0.1587214  |
| C | 0.4830695  | -4.9596690 | 0.1169444  |
| H | 0.8147630  | -5.9869123 | 0.1693769  |
| N | 1.2603270  | -3.9089458 | 0.0491356  |
| C | 1.0416013  | 2.8094559  | -0.0416492 |
| N | 2.0587198  | 1.9476147  | -0.1345796 |
| H | 3.0165683  | 2.2582902  | -0.0813444 |
| H | 1.8864266  | 0.9327612  | -0.1533253 |
| C | 1.2189614  | 4.2151916  | 0.0556172  |
| H | 2.2097612  | 4.6546916  | 0.0679675  |
| C | 0.0886594  | 4.9926259  | 0.1332991  |
| H | 0.1617767  | 6.0743351  | 0.2089779  |
| N | -1.1672940 | 4.4862354  | 0.1241462  |
| C | -1.2065583 | 3.1620753  | 0.0322252  |
| O | -2.4561134 | 2.6058014  | 0.0243273  |
| H | -3.0697469 | 3.3584431  | 0.0907590  |
| N | -0.2154626 | 2.2834657  | -0.0524317 |
| O | 4.4508317  | -0.1332901 | 0.0399399  |
| H | 5.1535154  | -0.7838309 | 0.1682043  |
| H | 3.6305380  | -0.6621336 | -0.0034878 |

32

G19C2BW1 HB

|   |            |            |            |
|---|------------|------------|------------|
| C | -1.8659584 | -1.1980391 | 0.0664558  |
| N | -2.8796041 | -0.2861738 | 0.1671314  |
| H | -2.7017356 | 0.6929693  | -0.0206414 |
| H | -3.7970022 | -0.6376459 | -0.0649182 |
| N | -0.5905022 | -0.7089963 | 0.1026229  |
| H | -0.4550629 | 0.3221034  | 0.1288327  |
| C | 0.6018105  | -1.4756689 | 0.0700607  |
| O | 1.6939921  | -0.8992102 | 0.1007352  |



|   |            |            |            |
|---|------------|------------|------------|
| C | 0.2910490  | -2.8730900 | -0.0004239 |
| N | 1.1184353  | -3.9836372 | -0.0501180 |
| C | 0.3018916  | -5.0060840 | -0.1158843 |
| H | 0.5951301  | -6.0444695 | -0.1673226 |
| N | -1.0272512 | -4.6260024 | -0.1131915 |
| H | -1.8359134 | -5.2308416 | -0.1534027 |
| C | -1.0538621 | -3.2537829 | -0.0382499 |
| N | -2.1648756 | -2.4850506 | -0.0132477 |
| C | 0.7872552  | 4.7095164  | -0.0476908 |
| N | 1.1673171  | 6.0141770  | -0.0643617 |
| H | 0.4654606  | 6.7096370  | -0.2717771 |
| H | 2.1341506  | 6.2567272  | -0.2131590 |
| N | -0.5402658 | 4.4731627  | -0.0880353 |
| C | -0.8991991 | 3.1945857  | -0.0314102 |
| O | -2.2328994 | 2.9331685  | -0.0709181 |
| H | -2.6787808 | 3.7955058  | -0.1347186 |
| N | -0.1251548 | 2.1183177  | 0.0542835  |
| C | 1.2028906  | 2.3719141  | 0.0844176  |
| H | 1.8358310  | 1.4896405  | 0.1448205  |
| C | 1.7163977  | 3.6496579  | 0.0376317  |
| H | 2.7854641  | 3.8253663  | 0.0660517  |
| O | 3.9500835  | -2.9247113 | -0.0018960 |
| H | 3.4723605  | -2.0776602 | 0.0418327  |
| H | 3.2002860  | -3.5481306 | -0.0272614 |

32

G17C1W1 HB

|   |            |            |            |
|---|------------|------------|------------|
| C | 0.5461820  | 1.2998306  | -0.0657242 |
| O | 1.7187045  | 0.8150275  | -0.0948854 |
| C | 0.1607200  | 2.6507520  | 0.0069532  |
| C | -1.1940248 | 3.0285011  | 0.0455279  |
| N | -2.2334553 | 2.1619663  | 0.0045874  |
| C | -1.8736821 | 0.8931492  | -0.0747676 |
| H | -3.7710410 | 0.2353169  | -0.0354425 |
| N | -2.8193449 | -0.0722427 | -0.1626097 |
| H | -2.6014719 | -1.0707989 | -0.0894541 |
| N | 0.8841725  | 3.8259703  | 0.0741130  |
| H | 1.9103346  | 3.8682024  | 0.0632199  |
| C | -0.0394501 | 4.8206209  | 0.1468314  |
| H | 0.2555508  | 5.8590331  | 0.2093629  |
| N | -1.2965220 | 4.3970872  | 0.1332282  |
| N | -0.5581304 | 0.4599535  | -0.1029956 |
| H | -0.3600007 | -0.5614412 | -0.1222200 |
| N | 0.0579861  | -2.3820603 | -0.0370957 |
| C | -0.9901100 | -3.2452670 | 0.0072508  |
| O | -2.1791200 | -2.9079767 | -0.0107608 |
| N | -0.6867918 | -4.6236863 | 0.0805263  |
| H | -1.4830231 | -5.2480360 | 0.1116064  |
| C | 0.5882516  | -5.0929927 | 0.1199537  |
| H | 0.7113206  | -6.1684859 | 0.1798730  |
| C | 1.6344129  | -4.2291250 | 0.0848699  |
| H | 2.6545292  | -4.5891988 | 0.1171699  |
| C | 1.3227614  | -2.8271156 | 0.0043434  |
| N | 2.2976379  | -1.9095860 | -0.0346773 |
| H | 3.2614376  | -2.2013253 | 0.0151533  |
| H | 2.0727929  | -0.8948742 | -0.0652129 |
| O | 3.5481317  | 2.8637217  | -0.0270335 |
| H | 3.0078158  | 2.0299734  | -0.0477580 |
| H | 3.9922196  | 2.8901824  | -0.8858277 |

32

G17C2AW1 HB

|   |            |            |           |
|---|------------|------------|-----------|
| N | -2.2330349 | -0.0286266 | 2.2086225 |
| C | -1.1854058 | -0.0294949 | 3.0691643 |
| N | -1.2745687 | -0.0574196 | 4.4391841 |

|   |            |            |            |
|---|------------|------------|------------|
| C | -0.0122974 | -0.0503418 | 4.8496047  |
| H | 0.2939805  | -0.0668098 | 5.8864376  |
| N | 0.8994216  | -0.0197359 | 3.8422509  |
| H | 1.9268961  | -0.0001238 | 3.8719284  |
| C | 0.1630845  | -0.0045449 | 2.6743047  |
| C | 0.5385916  | 0.0218617  | 1.3179303  |
| O | 1.7027658  | 0.0436201  | 0.8255328  |
| N | -0.5772976 | 0.0219160  | 0.4836942  |
| H | -0.3879723 | 0.0320167  | -0.5364806 |
| C | -1.8853196 | -0.0037748 | 0.9380991  |
| N | -2.8534108 | -0.0012906 | -0.0129336 |
| H | -2.6595231 | 0.0224530  | -1.0061565 |
| H | -3.8055715 | -0.0256683 | 0.3154693  |
| N | -0.7089715 | 0.0211864  | -4.7324725 |
| C | 0.5827232  | -0.0449334 | -5.1266163 |
| H | 0.7496234  | -0.0663512 | -6.2002567 |
| C | 1.6405185  | -0.0841906 | -4.2485882 |
| H | 2.6643667  | -0.1366622 | -4.6014945 |
| C | 1.3389880  | -0.0521729 | -2.8626343 |
| N | 2.2867937  | -0.0859618 | -1.9123049 |
| H | 2.0469538  | -0.0434601 | -0.9075771 |
| H | 3.2560970  | -0.1355389 | -2.1832665 |
| N | 0.0466739  | 0.0146406  | -2.4480710 |
| C | -0.8663222 | 0.0454872  | -3.4137245 |
| O | -2.1537868 | 0.1113787  | -2.9686576 |
| H | -2.7042514 | 0.1262754  | -3.7714984 |
| O | 3.5497168  | 0.0719026  | 2.8780347  |
| H | 3.0199311  | 0.0571310  | 2.0392855  |
| H | 4.0080369  | 0.9234731  | 2.8658650  |

32

G17C2BW1 HB

|   |            |            |            |
|---|------------|------------|------------|
| H | -3.7551888 | -0.0016109 | -0.6930681 |
| N | -2.8444043 | 0.2272476  | -0.3194983 |
| H | -2.6810732 | -0.0430671 | 0.6432142  |
| C | -1.8281026 | 0.0944667  | -1.2357669 |
| N | -2.1217508 | 0.0213107  | -2.5145075 |
| C | -1.0285234 | -0.0246734 | -3.3231764 |
| N | -1.0529748 | -0.1033039 | -4.6945815 |
| C | 0.2275693  | -0.1291166 | -5.0437466 |
| H | 0.5834315  | -0.1889209 | -6.0629465 |
| N | 1.0883011  | -0.0730659 | -3.9932946 |
| H | 2.1162868  | -0.0740241 | -3.9681241 |
| C | 0.2979248  | -0.0042606 | -2.8648078 |
| C | 0.6175112  | 0.0578521  | -1.4874863 |
| O | 1.7413743  | 0.0704500  | -0.9285854 |
| N | -0.5500337 | 0.1065710  | -0.7209873 |
| H | -0.4199232 | 0.1252858  | 0.3096918  |
| N | -0.0911624 | 0.0332874  | 2.1236015  |
| C | -0.8979890 | -0.0695529 | 3.1750948  |
| O | -2.2187452 | -0.1537223 | 2.8722726  |
| H | -2.6912128 | -0.2208980 | 3.7201151  |
| N | -0.5793829 | -0.1039349 | 4.4655406  |
| C | 0.7375958  | -0.0257125 | 4.7461737  |
| N | 1.0734385  | -0.0447907 | 6.0593810  |
| H | 2.0363711  | -0.0533331 | 6.3526245  |
| H | 0.3477321  | -0.1737996 | 6.7479099  |
| C | 1.6990038  | 0.0783026  | 3.7161523  |
| H | 2.7606238  | 0.1359467  | 3.9272961  |
| C | 1.2247963  | 0.1029457  | 2.4223306  |
| H | 1.8865698  | 0.1758744  | 1.5627605  |
| O | 3.6658854  | -0.0587964 | -2.8599508 |
| H | 4.1790890  | 0.7600608  | -2.8270730 |
| H | 3.0801107  | -0.0226713 | -2.0540182 |

32

G91C1W1 HB

|   |            |            |            |
|---|------------|------------|------------|
| H | -0.0223639 | -0.9468912 | -4.8002891 |
| O | -0.0082381 | 0.0551349  | -4.7031115 |
| C | 0.0035887  | 0.4117047  | -3.4219913 |
| N | 0.0342774  | 1.7233372  | -3.1772453 |
| C | -0.0061870 | -0.4865116 | -2.3307874 |
| C | 0.0194425  | 0.0959637  | -1.0581149 |
| C | 0.0523481  | 2.1522345  | -1.9012883 |
| N | 0.0484344  | 1.4094942  | -0.7763114 |
| N | 0.0298762  | 3.5233494  | -1.7412611 |
| H | 0.4165157  | 3.8703910  | -0.8746989 |
| H | 0.2985110  | 4.0388260  | -2.5692169 |
| N | -0.0243229 | -1.8740940 | -2.2129522 |
| N | 0.0145765  | -0.9459799 | -0.1696119 |
| C | -0.0118651 | -2.0950743 | -0.9122185 |
| H | -0.0196609 | -3.0678903 | -0.4433975 |
| H | 0.0180619  | -0.8390480 | 0.8686363  |
| O | 0.1068029  | -2.5116656 | 3.0943661  |
| C | 0.0532946  | -1.3365034 | 3.4415154  |
| N | 0.0010011  | -0.2750427 | 2.5818284  |
| N | 0.0401082  | -1.0232727 | 4.8281045  |
| H | 0.0793726  | -1.8167797 | 5.4552261  |
| C | -0.0302375 | 0.2488475  | 5.2970856  |
| H | -0.0381403 | 0.3743017  | 6.3742849  |
| C | -0.0869383 | 1.2946456  | 4.4325841  |
| H | -0.1434106 | 2.3127971  | 4.7950623  |
| C | -0.0655058 | 0.9827352  | 3.0287685  |
| N | -0.1192299 | 1.9704714  | 2.1178589  |
| H | -0.0739687 | 1.7857612  | 1.0981154  |
| H | -0.1699031 | 2.9271395  | 2.4313665  |
| O | -0.0300863 | -2.6304371 | -4.8142034 |
| H | -0.0342711 | -2.6468353 | -3.8135071 |
| H | -0.8825379 | -3.0036823 | -5.0810864 |

32

G91C2AW1 HB

|   |            |            |            |
|---|------------|------------|------------|
| C | -0.0849791 | -2.1509100 | 1.9289461  |
| N | -0.0851257 | -3.5210546 | 1.7821344  |
| H | -0.4624475 | -3.8746770 | 0.9143687  |
| H | -0.3495623 | -4.0302675 | 2.6145032  |
| N | -0.0757916 | -1.4186527 | 0.7965462  |
| C | -0.0253904 | -0.1049252 | 1.0670073  |
| N | -0.0065552 | 0.9292546  | 0.1671479  |
| H | -0.0183883 | 0.8140404  | -0.8679742 |
| C | 0.0451324  | 2.0853667  | 0.8998048  |
| H | 0.0677582  | 3.0554456  | 0.4254646  |
| N | 0.0602536  | 1.8757673  | 2.2016743  |
| C | 0.0173232  | 0.4902671  | 2.3331380  |
| C | -0.0027592 | -0.3970680 | 3.4343043  |
| O | 0.0194191  | -0.0284720 | 4.7108897  |
| H | 0.0442833  | 0.9740680  | 4.8007538  |
| N | -0.0551722 | -1.7092693 | 3.2012075  |
| C | -0.0900829 | 1.2032892  | -3.5617678 |
| O | -0.2109287 | 2.4648031  | -3.0810382 |
| H | -0.2433961 | 3.0383634  | -3.8670322 |
| N | -0.0286738 | 0.2642971  | -2.6193759 |
| C | 0.0977243  | -1.0138077 | -3.0505021 |
| N | 0.1639886  | -1.9818315 | -2.1159705 |
| H | 0.2638487  | -2.9391546 | -2.4142417 |
| H | 0.0841782  | -1.7893448 | -1.1038937 |
| C | 0.1575974  | -1.2888755 | -4.4397018 |
| H | 0.2584435  | -2.3019090 | -4.8123787 |
| C | 0.0793975  | -0.2147515 | -5.2979937 |
| H | 0.1184928  | -0.3630719 | -6.3742413 |

|   |            |           |            |
|---|------------|-----------|------------|
| N | -0.0472174 | 1.0651864 | -4.8849984 |
| O | 0.0634454  | 2.6531203 | 4.7931180  |
| H | 0.0801957  | 2.6630671 | 3.7927185  |
| H | 0.9104257  | 3.0298636 | 5.0712837  |

32

G91C2BW1 HB

|   |            |            |            |
|---|------------|------------|------------|
| C | 1.5901352  | 3.1343879  | -0.1308392 |
| N | 2.9517126  | 3.1301576  | -0.2449219 |
| H | 3.4222704  | 3.9983736  | -0.0387841 |
| H | 3.4371360  | 2.2688454  | -0.0355593 |
| N | 1.0071319  | 4.3594787  | -0.0967027 |
| C | -0.3125349 | 4.4133746  | -0.0326743 |
| O | -0.8739099 | 5.6423422  | 0.0043118  |
| H | -1.8379807 | 5.5147551  | 0.0544166  |
| C | -1.0772257 | 3.2377776  | 0.0022953  |
| N | -2.4414737 | 2.9994171  | 0.0827297  |
| C | -2.5255220 | 1.6890161  | 0.0984909  |
| H | -3.4458279 | 1.1249754  | 0.1575147  |
| N | -1.2981995 | 1.0519239  | 0.0319966  |
| H | -1.1403765 | 0.0467617  | 0.0415093  |
| C | -0.3474250 | 2.0433182  | -0.0300830 |
| N | 0.9813986  | 1.9310512  | -0.0986133 |
| C | -0.2678205 | -5.3301849 | -0.1094280 |
| N | -0.8329868 | -6.5569506 | -0.2764160 |
| H | -1.8353169 | -6.6285600 | -0.1749639 |
| H | -0.2851245 | -7.3873275 | -0.1132856 |
| N | -1.1118481 | -4.2814590 | -0.0696240 |
| C | -0.5430713 | -3.0838291 | 0.0565046  |
| O | -1.4029275 | -2.0269871 | 0.0890296  |
| H | -2.2931881 | -2.4110665 | 0.0037232  |
| N | 0.7433171  | -2.7764249 | 0.1565009  |
| C | 1.5697621  | -3.8423600 | 0.1129792  |
| H | 2.6293403  | -3.6139692 | 0.1877178  |
| C | 1.1279600  | -5.1422737 | -0.0182374 |
| H | 1.8220593  | -5.9738929 | -0.0524597 |
| O | 2.5879616  | -0.4514333 | 0.3611062  |
| H | 2.0325775  | 0.3279736  | 0.1414134  |
| H | 1.9322049  | -1.1752265 | 0.3801051  |

32

G92C1W1 HB

|   |            |            |            |
|---|------------|------------|------------|
| C | -1.4582148 | -0.1200316 | 3.0581206  |
| N | -2.8248382 | -0.1545744 | 3.2606958  |
| H | -3.3604031 | -0.5937795 | 2.5243526  |
| H | -3.0990441 | -0.4161903 | 4.1981466  |
| N | -0.7045018 | -0.0334357 | 4.1753949  |
| C | 0.6203368  | 0.0591372  | 4.0477709  |
| O | 1.3483807  | 0.1469511  | 5.1766840  |
| H | 0.7037096  | 0.1295646  | 5.9079634  |
| N | -1.0251044 | -0.1324452 | 1.7873021  |
| C | 0.3156823  | -0.0449594 | 1.7096045  |
| C | 1.2202872  | 0.0561357  | 2.7839149  |
| N | 2.5253295  | 0.1279280  | 2.3202454  |
| C | 2.3919938  | 0.0713808  | 1.0136108  |
| H | 3.2054360  | 0.1004302  | 0.3024721  |
| N | 1.0847555  | -0.0349619 | 0.5835137  |
| H | 0.7166936  | -0.0753613 | -0.3877078 |
| C | -1.6440567 | 0.0683228  | -2.0080441 |
| N | -2.3464684 | 0.0588017  | -0.8603997 |
| H | -1.8895165 | -0.0131420 | 0.0657149  |
| H | -3.3437399 | 0.2015025  | -0.8939037 |
| N | -0.3127625 | -0.0521779 | -1.9240090 |
| C | 0.4556209  | -0.0584551 | -3.0465067 |
| O | 1.6933094  | -0.1672227 | -3.0228586 |

|   |            |            |            |
|---|------------|------------|------------|
| N | -0.1973619 | 0.0673816  | -4.2878304 |
| H | 0.4259439  | 0.0595043  | -5.1090745 |
| C | -1.5416654 | 0.1891168  | -4.3850496 |
| H | -1.9490852 | 0.2774391  | -5.3861259 |
| C | -2.3182326 | 0.1966783  | -3.2682383 |
| H | -3.3943016 | 0.2903193  | -3.3381328 |
| O | 2.1940182  | -0.1789364 | -5.7005538 |
| H | 2.3043282  | -0.2144435 | -4.7137529 |
| H | 2.7268193  | 0.5760448  | -5.9860656 |

32

G92C2AW1 HB

|   |            |            |            |
|---|------------|------------|------------|
| C | -1.5485042 | 0.0881374  | 1.3847438  |
| N | -2.4624720 | 0.1861046  | 0.3918263  |
| H | -2.1485879 | 0.0954418  | -0.5819908 |
| H | -3.4296665 | 0.0489770  | 0.6382064  |
| N | -0.2436470 | 0.0852504  | 1.0242267  |
| C | 0.5952122  | 0.0278928  | 2.0736933  |
| N | 1.9623224  | 0.0090812  | 2.0654597  |
| H | 2.5769286  | 0.0371429  | 1.2348994  |
| C | 2.3502130  | -0.0576343 | 3.3932672  |
| H | 3.3964763  | -0.0855907 | 3.6636360  |
| N | 1.3513881  | -0.0831925 | 4.2424815  |
| C | 0.2287593  | -0.0308919 | 3.4292685  |
| C | -1.1537281 | -0.0357239 | 3.6606714  |
| O | -1.6531341 | -0.1031776 | 4.9084103  |
| H | -2.6225717 | -0.0915249 | 4.8038099  |
| N | -2.0203685 | 0.0229878  | 2.6535943  |
| C | 0.1010608  | -0.0432104 | -4.7284137 |
| N | 0.8161301  | -0.0006799 | -5.8918407 |
| H | 1.8125125  | -0.1513018 | -5.8138150 |
| H | 0.3736371  | -0.2828313 | -6.7531971 |
| C | -1.3100484 | -0.0958239 | -4.7165866 |
| H | -1.8974078 | -0.1376595 | -5.6265727 |
| C | -1.9045306 | -0.0854514 | -3.4728559 |
| H | -2.9874679 | -0.1240102 | -3.3787806 |
| N | -1.2179113 | -0.0285075 | -2.3164112 |
| C | 0.1219023  | 0.0156082  | -2.4517578 |
| N | 0.8150268  | 0.0080454  | -3.5944400 |
| O | 0.8590415  | 0.0705921  | -1.3455780 |
| H | 0.2989506  | 0.0790322  | -0.4603208 |
| O | 3.4376315  | 0.0100517  | -0.3692355 |
| H | 2.6490477  | -0.0056472 | -0.9574346 |
| H | 3.9317362  | 0.7960793  | -0.6409536 |

32

G92C2BW1 HB

|   |            |            |            |
|---|------------|------------|------------|
| C | 1.8342072  | 1.5945254  | -0.0016554 |
| N | 1.4252739  | 2.8846500  | -0.0122339 |
| H | 0.4548932  | 3.1951353  | 0.0540927  |
| H | 2.1513235  | 3.5784407  | 0.0739908  |
| N | 0.8726548  | 0.6189856  | -0.0691588 |
| C | 1.2440662  | -0.6771243 | -0.0760142 |
| O | 0.3224008  | -1.6242187 | -0.1433482 |
| H | -0.6227928 | -1.2296125 | -0.1500635 |
| C | 2.6081556  | -0.9989672 | -0.0161531 |
| N | 3.3066796  | -2.2008656 | -0.0036466 |
| C | 4.5612748  | -1.8361936 | 0.0612199  |
| H | 5.4083375  | -2.5073245 | 0.0892213  |
| N | 4.7354687  | -0.4592211 | 0.0932527  |
| H | 5.6090964  | 0.0461388  | 0.1430972  |
| C | 3.4797357  | 0.0997319  | 0.0444069  |
| N | 3.1648973  | 1.3945051  | 0.0578610  |
| C | -3.1712890 | -1.7618708 | 0.0564903  |
| N | -2.7693026 | -3.0631766 | 0.0549989  |

|   |            |            |            |
|---|------------|------------|------------|
| H | -3.4221298 | -3.7797083 | 0.3306372  |
| H | -1.7854268 | -3.2793373 | 0.1357323  |
| C | -4.5245298 | -1.3879576 | 0.1545314  |
| H | -5.3152679 | -2.1217631 | 0.2598770  |
| C | -4.7932107 | -0.0322557 | 0.1052181  |
| H | -5.8188726 | 0.3223779  | 0.1779242  |
| N | -3.8566098 | 0.9216745  | -0.0268613 |
| C | -2.6042851 | 0.4661080  | -0.1146435 |
| N | -2.2133503 | -0.8233892 | -0.0789005 |
| O | -1.6569375 | 1.3858078  | -0.2518875 |
| H | -0.6842952 | 1.0073492  | -0.1984319 |
| O | -1.2623059 | 4.0988441  | 0.1072270  |
| H | -1.7257132 | 3.2556576  | -0.0784546 |
| H | -1.5882291 | 4.3644956  | 0.9782261  |

32

G19C1W1 ST

|   |            |            |            |
|---|------------|------------|------------|
| N | -0.5104801 | 1.1194268  | -2.8831881 |
| C | -1.1580581 | 0.0526025  | -3.4828702 |
| H | -1.8611211 | 0.2021434  | -4.2897965 |
| N | -0.8163281 | -1.1040979 | -2.9699655 |
| C | 0.1069754  | -0.7889747 | -1.9893076 |
| C | 0.7888869  | -1.6316771 | -1.0486600 |
| O | 0.7339522  | -2.8389027 | -0.8501971 |
| N | 1.6409800  | -0.8256194 | -0.2213381 |
| H | 2.1543740  | -1.3573670 | 0.4733527  |
| C | 1.7220309  | 0.5404563  | -0.1986498 |
| N | 2.5477345  | 1.1042482  | 0.7403751  |
| H | 2.5222214  | 0.6632753  | 1.6558380  |
| H | 2.3995304  | 2.1042255  | 0.8209927  |
| N | 1.0687810  | 1.3095705  | -1.0523023 |
| C | 0.3081438  | 0.5918578  | -1.9177743 |
| H | -0.6184902 | 2.1023213  | -3.0971863 |
| N | -1.4741654 | 0.9274015  | 1.1898591  |
| C | -2.0368896 | -0.2030327 | 0.7033978  |
| H | -2.7905292 | -0.0820138 | -0.0663821 |
| C | -1.6412902 | -1.4187511 | 1.1677025  |
| H | -2.0640728 | -2.3336733 | 0.7760701  |
| C | -0.5718450 | -1.4140034 | 2.1143559  |
| N | -0.0830961 | -2.5988586 | 2.5742503  |
| H | 0.7604681  | -2.5547020 | 3.1295920  |
| H | -0.2257207 | -3.4309888 | 2.0192780  |
| N | 0.0033205  | -0.3062530 | 2.5814149  |
| C | -0.4276486 | 0.9122418  | 2.1403506  |
| O | 0.0834105  | 1.9901434  | 2.4754036  |
| H | -1.6311625 | 1.8387008  | 0.7456614  |
| O | -0.6106104 | 3.4790861  | 0.1144446  |
| H | -0.3522390 | 3.3871787  | 1.0561648  |
| H | 0.0702759  | 2.9394023  | -0.3416662 |

32

G19C2AW1 ST

|   |            |            |            |
|---|------------|------------|------------|
| N | 2.4557539  | -0.3282216 | 0.0249373  |
| C | 2.4860997  | 0.9747441  | -0.4211066 |
| H | 3.2635216  | 1.6596802  | -0.1169544 |
| N | 1.4924232  | 1.2570907  | -1.2303519 |
| C | 0.7566007  | 0.0864815  | -1.2999265 |
| C | -0.4846615 | -0.1886612 | -1.9539053 |
| O | -1.2159013 | 0.5254125  | -2.6380761 |
| N | -0.8722314 | -1.5399290 | -1.6993340 |
| H | -1.7317447 | -1.8109373 | -2.1654974 |
| C | -0.2124495 | -2.4420006 | -0.9032098 |
| N | -0.7508203 | -3.7043666 | -0.8032566 |
| H | -1.7600685 | -3.7816160 | -0.8271831 |
| H | -0.3267534 | -4.2447960 | -0.0590340 |

|   |            |            |            |
|---|------------|------------|------------|
| N | 0.9179301  | -2.1762654 | -0.2877344 |
| C | 1.3419931  | -0.9126403 | -0.5190195 |
| H | 3.0408313  | -0.7351993 | 0.7425907  |
| N | -1.2075775 | -0.9161434 | 1.9789497  |
| C | -2.0678901 | -0.1890758 | 1.2343296  |
| H | -2.9743855 | -0.7021357 | 0.9202247  |
| C | -1.8427991 | 1.1190337  | 0.8692336  |
| H | -2.5415648 | 1.6678830  | 0.2503282  |
| C | -0.6431179 | 1.7103155  | 1.3309314  |
| N | -0.3301663 | 3.0017271  | 1.0445070  |
| H | 0.6195621  | 3.2551434  | 1.2879033  |
| H | -0.6400819 | 3.3459021  | 0.1291959  |
| N | 0.2283661  | 1.0135414  | 2.0905888  |
| C | -0.1104416 | -0.2442070 | 2.3465152  |
| O | 0.8106391  | -0.9485469 | 3.0558005  |
| H | 0.4328157  | -1.8421101 | 3.1344140  |
| O | -0.4984986 | 3.3142975  | -1.8633479 |
| H | 0.3709988  | 2.8684397  | -1.7733750 |
| H | -1.0232301 | 2.5964702  | -2.2650932 |

32

G19C2BW1 ST

|   |            |            |            |
|---|------------|------------|------------|
| N | -0.8658260 | 3.4348726  | -0.1241342 |
| C | -0.3116269 | 3.4491819  | -1.3891425 |
| H | -0.6156935 | 4.1713553  | -2.1332268 |
| N | 0.5940529  | 2.5126120  | -1.5560026 |
| C | 0.6452094  | 1.8555792  | -0.3349253 |
| C | 1.3990494  | 0.6996261  | 0.0667640  |
| O | 2.2378072  | 0.0452629  | -0.5410830 |
| N | 1.0106768  | 0.3101357  | 1.3862337  |
| H | 1.4049490  | -0.5716674 | 1.7080964  |
| C | 0.0528433  | 0.9053708  | 2.1685369  |
| N | -0.1740502 | 0.3459431  | 3.3902629  |
| H | -0.0035385 | -0.6595278 | 3.4748145  |
| H | -0.9977197 | 0.7018503  | 3.8558858  |
| N | -0.6125957 | 1.9915042  | 1.8052862  |
| C | -0.2742500 | 2.4005914  | 0.5636641  |
| H | -1.5797126 | 4.0524970  | 0.2377696  |
| N | -1.0498546 | -2.3248657 | 0.2638380  |
| C | -1.6825728 | -1.1656814 | -0.0291921 |
| H | -2.3806434 | -0.8068409 | 0.7220072  |
| C | -1.4455428 | -0.4395044 | -1.1731423 |
| H | -1.9468351 | 0.5019117  | -1.3612190 |
| C | -0.4475636 | -0.9366757 | -2.0451874 |
| N | -0.0032342 | -0.2293678 | -3.1196039 |
| H | 0.8728598  | -0.5746898 | -3.4944328 |
| H | -0.0262382 | 0.7831554  | -3.0217009 |
| N | 0.1074986  | -2.1440367 | -1.8307781 |
| C | -0.2223475 | -2.7493372 | -0.6962248 |
| O | 0.3781869  | -3.9357660 | -0.4442471 |
| H | 0.9910693  | -4.0804063 | -1.1866946 |
| O | 0.2188970  | -2.3972624 | 2.7263711  |
| H | 0.6669179  | -3.2427478 | 2.8591633  |
| H | -0.3301083 | -2.5124769 | 1.9008543  |

32

G17C1W1 ST

|   |            |           |            |
|---|------------|-----------|------------|
| N | -1.7331342 | 1.0757871 | -1.0704088 |
| C | -0.9489000 | 1.8960219 | -0.3218420 |
| N | -0.4376526 | 3.1078341 | -0.7453285 |
| C | 0.2977936  | 3.5316152 | 0.2711596  |
| H | 0.8339741  | 4.4700240 | 0.2992964  |
| N | 0.3133550  | 2.6662242 | 1.3245872  |
| H | 0.7856560  | 2.7796020 | 2.2104979  |
| C | -0.4863098 | 1.6006815 | 0.9621306  |

|   |            |            |            |
|---|------------|------------|------------|
| C | -0.7077941 | 0.3404947  | 1.5885720  |
| O | -0.2395182 | -0.0904218 | 2.6468562  |
| N | -1.5615499 | -0.4323700 | 0.7753569  |
| H | -1.7319887 | -1.3973560 | 1.0704734  |
| C | -2.0141327 | -0.0698987 | -0.4794795 |
| N | -2.8304276 | -0.9732708 | -1.0939301 |
| H | -2.7158741 | -1.9524426 | -0.8266027 |
| H | -2.9806973 | -0.7850179 | -2.0752348 |
| N | 2.2051286  | -1.4963498 | 0.7545676  |
| C | 2.7600256  | -0.2741725 | 0.5641577  |
| H | 3.4515509  | 0.0726723  | 1.3229178  |
| C | 2.4294461  | 0.4535150  | -0.5340142 |
| H | 2.8550901  | 1.4330558  | -0.7070951 |
| C | 1.4607921  | -0.1242527 | -1.4171611 |
| N | 1.0747070  | 0.5536651  | -2.5297349 |
| H | 0.2181061  | 0.2181037  | -2.9537080 |
| H | 1.1679683  | 1.5615532  | -2.5212299 |
| N | 0.9112995  | -1.3218565 | -1.2192798 |
| C | 1.2573384  | -2.0502432 | -0.1291413 |
| O | 0.7862382  | -3.1626334 | 0.1622829  |
| H | 2.3676133  | -2.0208929 | 1.6055313  |
| O | -1.8647241 | -3.3187241 | 0.2482908  |
| H | -2.0919017 | -4.0853339 | 0.7895148  |
| H | -0.8770626 | -3.3658212 | 0.1076340  |

32

G17C2AW1 ST

|   |            |            |            |
|---|------------|------------|------------|
| N | -1.4694212 | -1.0437677 | -0.5876556 |
| C | -0.6993472 | -2.1640151 | -0.6394680 |
| N | -0.5990544 | -3.0048509 | -1.7295913 |
| C | 0.2715614  | -3.9305007 | -1.3564248 |
| H | 0.5847204  | -4.7678827 | -1.9642629 |
| N | 0.7563727  | -3.7405290 | -0.0961109 |
| H | 1.4173579  | -4.3179461 | 0.4056914  |
| C | 0.1419846  | -2.6011960 | 0.3873504  |
| C | 0.3435947  | -1.8611473 | 1.5895987  |
| O | 1.1064338  | -2.0896320 | 2.5293293  |
| N | -0.4849430 | -0.7149611 | 1.5628389  |
| H | -0.3522129 | -0.0399425 | 2.3210631  |
| C | -1.3286390 | -0.3619270 | 0.5309071  |
| N | -2.0699431 | 0.7680380  | 0.7273105  |
| H | -1.8141577 | 1.3991880  | 1.4782561  |
| H | -2.4804481 | 1.1665458  | -0.1040221 |
| N | -0.3097305 | 3.5822743  | -0.8936831 |
| C | -0.6252055 | 2.8846419  | -2.0082183 |
| H | -1.3624754 | 3.3428896  | -2.6620913 |
| C | -0.0709654 | 1.6625276  | -2.3183374 |
| H | -0.3624006 | 1.1159477  | -3.2068886 |
| C | 0.8812168  | 1.1471924  | -1.4105880 |
| N | 1.5345257  | -0.0264565 | -1.6278471 |
| H | 2.0276135  | -0.4056190 | -0.8296293 |
| H | 1.0964930  | -0.7062492 | -2.2355642 |
| N | 1.2096835  | 1.8192819  | -0.2887787 |
| C | 0.5889235  | 2.9759962  | -0.1213122 |
| O | 0.9062258  | 3.6251078  | 1.0450213  |
| H | 0.3819452  | 4.4462081  | 1.0236786  |
| O | -0.3429926 | 1.8652986  | 2.9706395  |
| H | -0.1015849 | 1.9778950  | 3.8997684  |
| H | 0.2896566  | 2.4094397  | 2.4598354  |

32

G17C2BW1 ST

|   |           |            |            |
|---|-----------|------------|------------|
| N | 1.0256122 | 0.5482832  | -1.7740063 |
| C | 1.9907448 | 0.3022845  | -0.8464264 |
| N | 3.1159576 | -0.4686435 | -1.0593872 |



|   |            |            |            |
|---|------------|------------|------------|
| C | 3.7529361  | -0.4560541 | 0.1016654  |
| H | 4.6949613  | -0.9487380 | 0.2974060  |
| N | 3.1083868  | 0.2643301  | 1.0629598  |
| H | 3.4006648  | 0.4230683  | 2.0174140  |
| C | 1.9649219  | 0.7632025  | 0.4713282  |
| C | 0.8498165  | 1.4553241  | 1.0261791  |
| O | 0.6568169  | 1.8213947  | 2.1864694  |
| N | -0.1128690 | 1.6568011  | 0.0104499  |
| H | -1.0072838 | 2.0607148  | 0.3006114  |
| C | 0.0081329  | 1.2382239  | -1.2994892 |
| N | -1.0128436 | 1.5906008  | -2.1257804 |
| H | -1.8342470 | 2.0564152  | -1.7627661 |
| H | -1.0115761 | 1.2019429  | -3.0546448 |
| N | -2.1418035 | -0.8067311 | 1.4962780  |
| C | -0.9574500 | -1.2762269 | 1.9439055  |
| H | -0.7470482 | -1.0995417 | 2.9946495  |
| C | -0.0349320 | -1.9119040 | 1.1378737  |
| H | 0.9176040  | -2.2502628 | 1.5286804  |
| C | -0.3698496 | -2.0643528 | -0.2245520 |
| N | 0.4585180  | -2.6617920 | -1.1277026 |
| H | 0.2597969  | -2.4348715 | -2.0945372 |
| H | 1.4464882  | -2.6640636 | -0.9091758 |
| N | -1.5581250 | -1.6277019 | -0.6890619 |
| C | -2.3403589 | -1.0313259 | 0.2058317  |
| O | -3.5201631 | -0.5338784 | -0.2879653 |
| H | -3.5147798 | -0.7563997 | -1.2359635 |
| O | -3.0479397 | 2.2836465  | -0.0338934 |
| H | -3.4156551 | 2.7891517  | 0.7038996  |
| H | -3.3792577 | 1.3693505  | 0.0826385  |

32

G91C1W1 ST

|   |            |            |            |
|---|------------|------------|------------|
| N | -0.6721882 | -0.5924505 | 2.4189253  |
| C | -1.2801692 | -0.0411403 | 1.3658935  |
| N | -2.4832187 | -0.4043361 | 0.8025863  |
| H | -3.0730791 | -1.1671083 | 1.1033883  |
| C | -2.7101158 | 0.4484585  | -0.2586734 |
| H | -3.5917053 | 0.3657575  | -0.8768184 |
| N | -1.7505722 | 1.3258894  | -0.4183564 |
| C | -0.8309744 | 1.0322984  | 0.5847848  |
| C | 0.4397204  | 1.5504159  | 0.9277995  |
| O | 1.0844005  | 2.4890456  | 0.2463929  |
| H | 0.6085305  | 2.6974321  | -0.6389516 |
| N | 1.0740928  | 1.0387627  | 1.9862951  |
| C | 0.4974884  | 0.0255087  | 2.6687343  |
| N | 1.2472987  | -0.4808172 | 3.7098249  |
| H | 1.9486174  | 0.1500366  | 4.0735628  |
| H | 0.7288190  | -1.0093506 | 4.3980712  |
| N | 1.7759605  | -0.2118057 | -1.4050405 |
| C | 1.9931503  | -1.0023943 | -0.3257154 |
| H | 2.8188569  | -0.7347566 | 0.3218116  |
| C | 1.1643532  | -2.0529437 | -0.0824721 |
| H | 1.2942766  | -2.6746792 | 0.7928395  |
| C | 0.0903219  | -2.2370236 | -1.0083411 |
| N | -0.8100431 | -3.2457162 | -0.8050386 |
| H | -1.4290467 | -3.4505616 | -1.5782569 |
| H | -0.5614168 | -4.0118981 | -0.1970821 |
| N | -0.1337263 | -1.4531122 | -2.0565423 |
| C | 0.6790508  | -0.3835043 | -2.2850093 |
| O | 0.5272211  | 0.4390566  | -3.1952699 |
| H | 2.3345665  | 0.6199516  | -1.5562609 |
| O | -0.1257321 | 2.8781674  | -2.0444289 |
| H | 0.1563906  | 2.1306663  | -2.6241633 |
| H | -0.9792801 | 2.5346596  | -1.6876582 |

32

G91C2AW1 ST

|   |            |            |            |
|---|------------|------------|------------|
| N | 1.0614618  | 0.7641810  | -1.9560997 |
| C | 1.3685579  | 0.5073391  | -0.6868007 |
| N | 2.2660222  | -0.4223391 | -0.2031516 |
| H | 2.7662069  | -1.1052252 | -0.7550849 |
| C | 2.2257131  | -0.3561304 | 1.1691294  |
| H | 2.8120151  | -1.0166911 | 1.7895071  |
| N | 1.3965694  | 0.5634651  | 1.6061411  |
| C | 0.8376556  | 1.1163875  | 0.4575871  |
| C | -0.1718658 | 2.0737666  | 0.2239253  |
| O | -0.8451956 | 2.7158849  | 1.1862477  |
| H | -0.5987032 | 2.3612002  | 2.0874405  |
| N | -0.5168463 | 2.3600617  | -1.0263903 |
| C | 0.1037895  | 1.7081651  | -2.0373187 |
| N | -0.3471737 | 2.0157927  | -3.2959337 |
| H | -0.8557009 | 2.8835089  | -3.3848618 |
| H | 0.2510949  | 1.7489925  | -4.0643425 |
| N | -0.4116383 | -2.5712160 | -1.3887016 |
| C | -1.3388083 | -1.6249088 | -1.6420329 |
| H | -1.5959235 | -1.4767559 | -2.6872954 |
| C | -1.9284246 | -0.8599284 | -0.6580645 |
| H | -2.6504015 | -0.0885753 | -0.8986656 |
| C | -1.5031511 | -1.0958099 | 0.6682483  |
| N | -2.0120387 | -0.4045221 | 1.7273916  |
| H | -1.4692576 | -0.4162843 | 2.5826158  |
| H | -2.4889266 | 0.4656153  | 1.5371061  |
| N | -0.5783758 | -2.0342964 | 0.9515488  |
| C | -0.1066629 | -2.7010509 | -0.0944232 |
| O | 0.8442992  | -3.6302261 | 0.1993210  |
| H | 1.0430159  | -4.0535847 | -0.6549129 |
| O | -0.2320489 | 1.4594197  | 3.5230159  |
| H | 0.1326453  | 1.9215598  | 4.2906025  |
| H | 0.5443405  | 1.0394589  | 3.0432290  |

32

G91C2AW1 ST

|   |            |            |            |
|---|------------|------------|------------|
| N | 0.5062267  | 0.0823960  | 1.7006433  |
| C | 0.4674211  | 1.0888205  | 0.8193121  |
| N | -0.5025824 | 2.0444790  | 0.6436917  |
| H | -1.4435489 | 2.0500960  | 1.0629452  |
| C | -0.1028283 | 2.8095739  | -0.4323741 |
| H | -0.7119168 | 3.6271660  | -0.7909516 |
| N | 1.0577298  | 2.4539394  | -0.9426928 |
| C | 1.4277786  | 1.3705555  | -0.1634609 |
| C | 2.5078479  | 0.4840877  | -0.2251055 |
| O | 3.4948421  | 0.6040936  | -1.1444598 |
| H | 3.2965949  | 1.4007882  | -1.6686423 |
| N | 2.5867647  | -0.5420607 | 0.6086446  |
| C | 1.5910200  | -0.6864180 | 1.5206128  |
| N | 1.6895437  | -1.8170739 | 2.3118397  |
| H | 2.6318631  | -2.1666432 | 2.4251445  |
| H | 1.1353310  | -1.7866976 | 3.1571627  |
| N | -2.3425757 | -0.0295009 | -1.1897509 |
| C | -1.3165620 | -0.0389888 | -2.0663419 |
| H | -1.3365675 | 0.7358555  | -2.8279378 |
| C | -0.2767622 | -0.9443080 | -2.0198363 |
| H | 0.5457769  | -0.8961821 | -2.7235237 |
| C | -0.3164700 | -1.9070705 | -0.9894991 |
| N | 0.6485476  | -2.8601786 | -0.8293735 |
| H | 0.6738299  | -3.2780196 | 0.0938555  |
| H | 1.5621280  | -2.6441196 | -1.2063996 |
| N | -1.3403817 | -1.9340300 | -0.1158393 |
| C | -2.2582800 | -0.9868915 | -0.2732001 |
| O | -3.2510666 | -0.9696996 | 0.6695930  |

|   |            |            |           |
|---|------------|------------|-----------|
| H | -3.0280410 | -1.6834607 | 1.2928827 |
| O | -3.3107200 | 1.8471658  | 1.3916452 |
| H | -3.4115557 | 0.8846524  | 1.2504993 |
| H | -3.7723155 | 2.2249597  | 0.6280225 |

32

G92C1W1 ST

|   |            |            |            |
|---|------------|------------|------------|
| N | -0.4214487 | 1.7400446  | 0.5279866  |
| C | 0.7460833  | 1.0833144  | 0.4871753  |
| N | 1.7191879  | 1.1521475  | -0.4715119 |
| H | 1.6513227  | 1.6026868  | -1.4062707 |
| C | 2.6884456  | 0.2475317  | -0.0983475 |
| H | 3.5639738  | 0.0931748  | -0.7133219 |
| N | 2.4444268  | -0.3793232 | 1.0324653  |
| C | 1.2165373  | 0.1355270  | 1.4225259  |
| C | 0.3453019  | -0.1117362 | 2.4866513  |
| O | 0.6408944  | -1.0179576 | 3.4462216  |
| H | -0.1077623 | -0.9884406 | 4.0702947  |
| N | -0.8221271 | 0.5211436  | 2.5787377  |
| C | -1.1474462 | 1.4004980  | 1.6001225  |
| N | -2.4122949 | 1.9570353  | 1.6976961  |
| H | -2.7974577 | 1.9569607  | 2.6332312  |
| H | -2.5190342 | 2.8285725  | 1.1962088  |
| N | -2.0464490 | -0.2782182 | -1.6698737 |
| C | -2.3244704 | -0.9166991 | -0.5060191 |
| H | -3.2627067 | -0.6721377 | -0.0231674 |
| C | -1.4216323 | -1.7867404 | 0.0160942  |
| H | -1.6123007 | -2.2937437 | 0.9523300  |
| C | -0.1997669 | -1.9541175 | -0.7106696 |
| N | 0.7428741  | -2.8218246 | -0.2526613 |
| H | 1.6629697  | -2.7059012 | -0.6594663 |
| H | 0.7428358  | -3.0390766 | 0.7348799  |
| N | 0.0765228  | -1.3108708 | -1.8435828 |
| C | -0.8191355 | -0.4265220 | -2.3500149 |
| O | -0.6285936 | 0.2805649  | -3.3529572 |
| H | -2.6673344 | 0.4315423  | -2.0382701 |
| O | 1.5184336  | 1.9024985  | -3.1286602 |
| H | 1.1493758  | 2.7470725  | -3.4222165 |
| H | 0.8106152  | 1.2362893  | -3.3403444 |

32

G92C2AW1 ST

|   |            |            |            |
|---|------------|------------|------------|
| N | 1.9055732  | 1.5203525  | -0.5388578 |
| C | 0.7844838  | 2.2081170  | -0.3117306 |
| N | 0.3427154  | 3.3333352  | -0.9707036 |
| H | 0.8385593  | 3.8292763  | -1.6984700 |
| C | -0.9007024 | 3.6429654  | -0.4443312 |
| H | -1.4650315 | 4.4935750  | -0.8003905 |
| N | -1.2867279 | 2.8166237  | 0.4973899  |
| C | -0.2355682 | 1.9137521  | 0.6060217  |
| C | -0.0277148 | 0.7571558  | 1.3784626  |
| O | -0.9225840 | 0.3583447  | 2.2760529  |
| H | -0.6481519 | -0.5529370 | 2.6150525  |
| N | 1.0804982  | 0.0279816  | 1.1800792  |
| C | 1.9804689  | 0.4351751  | 0.2494876  |
| N | 3.1082771  | -0.3374450 | 0.1327518  |
| H | 3.0287395  | -1.2873278 | 0.4664763  |
| H | 3.6275344  | -0.2150448 | -0.7255002 |
| N | 0.5601511  | -2.1711964 | -1.7682551 |
| C | 0.1194308  | -1.0227798 | -2.3229026 |
| H | 0.7027805  | -0.6431515 | -3.1576093 |
| C | -0.9913069 | -0.3416503 | -1.8736310 |
| H | -1.3130591 | 0.5849691  | -2.3342824 |
| C | -1.6696496 | -0.8906729 | -0.7632339 |
| N | -2.7809226 | -0.3067780 | -0.2303917 |

|   |            |            |            |
|---|------------|------------|------------|
| H | -3.0210090 | -0.6214765 | 0.7013650  |
| H | -2.8902012 | 0.6901070  | -0.3703106 |
| N | -1.2506925 | -2.0354140 | -0.1880162 |
| C | -0.1747126 | -2.5907723 | -0.7364242 |
| O | 0.2357112  | -3.7341867 | -0.1283501 |
| H | 1.0125804  | -4.0312666 | -0.6338674 |
| O | 0.0450692  | -2.0751983 | 2.7703372  |
| H | -0.4645391 | -2.6176231 | 2.1435606  |
| H | 0.7393267  | -1.6643406 | 2.2040549  |

32

G92C2BW1 ST

|   |            |            |            |
|---|------------|------------|------------|
| N | 0.0226772  | -0.6068196 | 1.8895646  |
| C | -0.6655088 | -1.3060197 | 0.9846881  |
| N | -2.0093771 | -1.5903100 | 0.9545303  |
| H | -2.7121012 | -1.1873550 | 1.5603482  |
| C | -2.2460350 | -2.2817556 | -0.2206394 |
| H | -3.2445301 | -2.5893144 | -0.4950465 |
| N | -1.1628633 | -2.5009143 | -0.9270661 |
| C | -0.1627228 | -1.8905985 | -0.1859076 |
| C | 1.1866643  | -1.6502968 | -0.4421754 |
| O | 1.8132043  | -2.0782534 | -1.5599416 |
| H | 1.1550004  | -2.5604771 | -2.0917945 |
| N | 1.9159717  | -0.9380078 | 0.4082814  |
| C | 1.3068600  | -0.4600758 | 1.5293842  |
| N | 2.0976313  | 0.3107675  | 2.3397509  |
| H | 3.0971516  | 0.2245353  | 2.2255681  |
| H | 1.7486117  | 0.4876010  | 3.2701361  |
| N | -2.2224876 | 0.9445613  | -1.0711135 |
| C | -1.1898860 | 0.8128308  | -1.9295862 |
| H | -1.3956396 | 0.2290859  | -2.8232982 |
| C | 0.0660081  | 1.3421606  | -1.7142414 |
| H | 0.8773032  | 1.1901218  | -2.4159906 |
| C | 0.2504303  | 2.0799850  | -0.5231899 |
| N | 1.4350407  | 2.6673294  | -0.2022104 |
| H | 1.5004132  | 2.9712659  | 0.7610982  |
| H | 2.2890865  | 2.2486926  | -0.5772805 |
| N | -0.7713733 | 2.2443034  | 0.3416985  |
| C | -1.9196644 | 1.6524821  | 0.0135787  |
| O | -2.9167819 | 1.7551124  | 0.9349105  |
| H | -2.5348424 | 2.2853421  | 1.6565649  |
| O | 3.7330294  | 0.8854115  | -0.7233942 |
| H | 4.1278628  | 0.5476983  | -1.5386980 |
| H | 3.2127573  | 0.1232956  | -0.3593195 |

32

G19C1W1 TS

|   |            |            |            |
|---|------------|------------|------------|
| N | -4.3204804 | 1.1358065  | -0.4416087 |
| C | -4.3812288 | 0.5593133  | -1.7012668 |
| H | -5.1698337 | 0.8103581  | -2.3965308 |
| N | -3.4063895 | -0.2853152 | -1.9242300 |
| C | -2.6624619 | -0.2691931 | -0.7541959 |
| C | -1.4725264 | -0.9729937 | -0.3994517 |
| O | -0.8148280 | -1.7916911 | -1.0601179 |
| N | -1.0478367 | -0.6207817 | 0.9017056  |
| H | -0.1669797 | -1.0351597 | 1.2262910  |
| C | -1.6824212 | 0.2600193  | 1.7478405  |
| N | -1.1181154 | 0.4446928  | 2.9606048  |
| H | -0.2738500 | -0.0671141 | 3.2219795  |
| H | -1.5625257 | 1.0950370  | 3.5875128  |
| N | -2.7919017 | 0.9145469  | 1.4271438  |
| C | -3.2145565 | 0.6122924  | 0.1835959  |
| H | -4.9600556 | 1.8097564  | -0.0437960 |
| N | 4.3113635  | 0.9192645  | -0.0161403 |
| C | 4.3993996  | 1.0886391  | -1.3631378 |

|   |           |            |            |
|---|-----------|------------|------------|
| H | 5.2508339 | 1.6496663  | -1.7313113 |
| C | 3.4468769 | 0.5652810  | -2.1743253 |
| H | 3.5019843 | 0.6904979  | -3.2482502 |
| C | 2.3707711 | -0.1535849 | -1.5401879 |
| N | 1.4012941 | -0.7074963 | -2.2791116 |
| H | 0.6023399 | -1.1834127 | -1.8234724 |
| H | 1.3930149 | -0.5832065 | -3.2793330 |
| N | 2.2914136 | -0.3027169 | -0.2109891 |
| C | 3.2486011 | 0.2121691  | 0.5868306  |
| O | 3.2681760 | 0.1125963  | 1.8298434  |
| H | 5.0089011 | 1.2957490  | 0.6132524  |
| O | 1.1615596 | -1.1677263 | 2.8260347  |
| H | 1.9755629 | -0.7138210 | 2.4520883  |
| H | 1.4386270 | -2.0610916 | 3.0643792  |

32

G19C2AW1 TS

|   |            |            |            |
|---|------------|------------|------------|
| N | 0.9842917  | -4.5860093 | 0.2658132  |
| C | 0.4875676  | -4.6757987 | 1.5566398  |
| H | 0.6948892  | -5.5338811 | 2.1802209  |
| N | -0.2283447 | -3.6356345 | 1.9023058  |
| C | -0.2044849 | -2.8154380 | 0.7858736  |
| C | -0.8001603 | -1.5375348 | 0.5584984  |
| O | -1.5112298 | -0.8533012 | 1.3047704  |
| N | -0.4780129 | -1.0603377 | -0.7376853 |
| H | -0.8448933 | -0.1373421 | -0.9787261 |
| C | 0.2631434  | -1.7263226 | -1.6847683 |
| N | 0.4634765  | -1.0814784 | -2.8668899 |
| H | -0.1929569 | -0.3451093 | -3.1226752 |
| H | 0.8408354  | -1.6576512 | -3.6051985 |
| N | 0.8052946  | -2.9162197 | -1.4838347 |
| C | 0.5473880  | -3.3892532 | -0.2459864 |
| H | 1.5593795  | -5.2614683 | -0.2186859 |
| N | 0.9295555  | 4.5261014  | -0.1275842 |
| C | 1.0769809  | 4.6129846  | 1.2144644  |
| H | 1.6297514  | 5.4763991  | 1.5756011  |
| C | 0.5709096  | 3.6829308  | 2.0929426  |
| H | 0.7079719  | 3.7871826  | 3.1635272  |
| C | -0.1331569 | 2.5803087  | 1.5403735  |
| N | -0.6885219 | 1.6187998  | 2.2979966  |
| H | -1.0703666 | 0.7657699  | 1.8647306  |
| H | -0.5091878 | 1.6069800  | 3.2898850  |
| N | -0.2862650 | 2.4712573  | 0.1974812  |
| C | 0.2503028  | 3.4492824  | -0.5130750 |
| O | 0.0691930  | 3.3223698  | -1.8671910 |
| H | 0.5048949  | 4.0940864  | -2.2682751 |
| O | -1.4186242 | 1.1029805  | -2.7424578 |
| H | -0.9580514 | 1.9153882  | -2.4437618 |
| H | -2.3490408 | 1.2362198  | -2.5174526 |

32

G17C1W1 TS

|   |            |           |            |
|---|------------|-----------|------------|
| N | 1.5060586  | 3.0315817 | -0.6879793 |
| C | 0.2810946  | 3.5589836 | -0.4534820 |
| N | -0.1183516 | 4.8352111 | -0.7921964 |
| C | -1.3691320 | 4.9134117 | -0.3730134 |
| H | -2.0018815 | 5.7848479 | -0.4713918 |
| N | -1.8217852 | 3.7679206 | 0.2170419  |
| H | -2.7313289 | 3.5997087 | 0.6232523  |
| C | -0.7656873 | 2.8767182 | 0.1785776  |
| C | -0.6409362 | 1.5423657 | 0.6306903  |
| O | -1.5071120 | 0.8427962 | 1.1980929  |
| N | 0.6455142  | 1.0595249 | 0.3591265  |
| H | 0.8696955  | 0.1097571 | 0.6730249  |
| C | 1.6452788  | 1.7886529 | -0.2679044 |

|   |            |            |            |
|---|------------|------------|------------|
| N | 2.8150410  | 1.1295804  | -0.4814214 |
| H | 3.0251271  | 0.3106874  | 0.0959505  |
| H | 3.5771241  | 1.7204688  | -0.7809585 |
| N | 0.1893838  | -4.6596422 | -0.6494327 |
| C | -1.1380288 | -4.8530897 | -0.8723186 |
| H | -1.4277655 | -5.8008137 | -1.3114982 |
| C | -2.0270607 | -3.8810712 | -0.5477517 |
| H | -3.0874598 | -4.0196720 | -0.7176767 |
| C | -1.4917676 | -2.6696811 | 0.0203727  |
| N | -2.3107808 | -1.6678656 | 0.3693157  |
| H | -1.9321896 | -0.7740927 | 0.7326307  |
| H | -3.3007975 | -1.7451064 | 0.1959665  |
| N | -0.1815178 | -2.4899389 | 0.2286725  |
| C | 0.6950349  | -3.4697301 | -0.0814527 |
| O | 1.9255813  | -3.4032041 | 0.0968266  |
| H | 0.8751813  | -5.3678015 | -0.8789260 |
| O | 2.6231870  | -1.0850054 | 1.2175831  |
| H | 2.3792605  | -1.9681057 | 0.8130525  |
| H | 2.7517335  | -1.2498450 | 2.1599379  |

32

G17C2AW1 TS

|   |            |            |            |
|---|------------|------------|------------|
| N | -2.6799169 | -0.7772230 | 1.5224820  |
| C | -3.3985939 | -0.4926103 | 0.4070768  |
| N | -4.7305945 | -0.7890210 | 0.2173548  |
| C | -5.0086335 | -0.3088364 | -0.9824168 |
| H | -5.9767545 | -0.3609216 | -1.4610174 |
| N | -3.9423474 | 0.2852728  | -1.5944997 |
| H | -3.9177626 | 0.7210054  | -2.5056869 |
| C | -2.8868976 | 0.1781313  | -0.7100231 |
| C | -1.5307219 | 0.5661971  | -0.8062089 |
| O | -0.9590945 | 1.1339636  | -1.7595056 |
| N | -0.8388045 | 0.2089759  | 0.3616490  |
| H | 0.1796666  | 0.3482468  | 0.3426931  |
| C | -1.4197856 | -0.4034179 | 1.4625653  |
| N | -0.5788457 | -0.6444068 | 2.5161273  |
| H | 0.0844858  | 0.1097298  | 2.7247497  |
| H | -1.0873692 | -0.9783978 | 3.3262295  |
| N | 4.4948781  | -0.6907217 | 0.2864635  |
| C | 4.7168443  | -0.8715300 | -1.0346585 |
| H | 5.6768083  | -1.3065743 | -1.2999594 |
| C | 3.8041997  | -0.5295189 | -2.0036320 |
| H | 4.0167314  | -0.6792978 | -3.0562761 |
| C | 2.5698030  | 0.0247814  | -1.5732690 |
| N | 1.6189080  | 0.4107702  | -2.4389475 |
| H | 0.6925808  | 0.7461754  | -2.1223211 |
| H | 1.7542740  | 0.2362974  | -3.4224493 |
| N | 2.3161946  | 0.1927883  | -0.2478589 |
| C | 3.3051325  | -0.1671837 | 0.5628891  |
| O | 3.0561115  | 0.0404477  | 1.8905738  |
| H | 3.8536292  | -0.2680697 | 2.3561123  |
| O | 1.0854759  | 1.7591758  | 2.8608182  |
| H | 1.8857813  | 1.3510619  | 2.4732757  |
| H | 0.8348436  | 2.4583538  | 2.2408021  |

32

G17C2BW1 TS

|   |            |            |           |
|---|------------|------------|-----------|
| N | -1.8248879 | -0.2292691 | 2.3139577 |
| C | -0.7609526 | 0.0955073  | 3.0905535 |
| N | -0.8311029 | 0.4960804  | 4.4064846 |
| C | 0.4259440  | 0.7092542  | 4.7558398 |
| H | 0.7489399  | 1.0379617  | 5.7337930 |
| N | 1.3201391  | 0.4751855  | 3.7517185 |
| H | 2.3253242  | 0.5706433  | 3.7857467 |
| C | 0.5725245  | 0.0758659  | 2.6608125 |

|   |            |            |            |
|---|------------|------------|------------|
| C | 0.9409055  | -0.2955374 | 1.3474592  |
| O | 2.0807745  | -0.3580212 | 0.8509006  |
| N | -0.2100932 | -0.6197103 | 0.6043465  |
| H | -0.0326740 | -0.9242471 | -0.3503285 |
| C | -1.5120155 | -0.5890121 | 1.0870473  |
| N | -2.4928925 | -1.0110432 | 0.2397377  |
| H | -2.3689714 | -0.9493386 | -0.7756740 |
| H | -3.4254198 | -0.8280179 | 0.5848759  |
| N | -1.6392491 | -0.7065779 | -2.6237671 |
| C | -0.5219888 | -1.4707018 | -2.6808492 |
| H | -0.6828287 | -2.5410496 | -2.5758660 |
| C | 0.7484031  | -0.9625347 | -2.8249079 |
| H | 1.6244353  | -1.5977588 | -2.8375038 |
| C | 0.8622440  | 0.4486255  | -2.9370696 |
| N | 2.0632759  | 1.0535136  | -3.0688161 |
| H | 2.0649612  | 2.0613776  | -2.9840672 |
| H | 2.8778088  | 0.5512599  | -2.7081819 |
| N | -0.2397544 | 1.2271469  | -2.9339495 |
| C | -1.4054290 | 0.6004255  | -2.7751903 |
| O | -2.5066937 | 1.3816966  | -2.7295423 |
| H | -2.1873872 | 2.2963306  | -2.8254157 |
| O | 3.7581941  | -0.4546262 | -1.3443050 |
| H | 4.3246583  | -1.2295242 | -1.2391609 |
| H | 3.1510142  | -0.4624139 | -0.5666936 |

32

G91C1W1 TS

|   |            |            |            |
|---|------------|------------|------------|
| N | 0.2902773  | 0.5490972  | -1.0039224 |
| C | -0.5488347 | 0.0499680  | -1.9287213 |
| N | -1.8856384 | -0.2183106 | -1.8216530 |
| H | -2.4960128 | 0.0065459  | -1.0047212 |
| C | -2.2743321 | -0.7140681 | -3.0496529 |
| H | -3.2999010 | -1.0026029 | -3.2327253 |
| N | -1.2993879 | -0.7961903 | -3.9309746 |
| C | -0.2014513 | -0.3162208 | -3.2364058 |
| C | 1.1387997  | -0.1209848 | -3.5905212 |
| O | 1.6202350  | -0.4235247 | -4.8139063 |
| H | 0.8764149  | -0.7756467 | -5.3353336 |
| N | 1.9997470  | 0.3881372  | -2.7184655 |
| C | 1.5397880  | 0.6945673  | -1.4862140 |
| N | 2.4914241  | 1.1709766  | -0.6026544 |
| H | 3.3344135  | 1.5053006  | -1.0510068 |
| H | 2.1370231  | 1.7664436  | 0.1346700  |
| N | 0.1393249  | 0.0886914  | 1.8841953  |
| C | 1.3051767  | -0.5327712 | 2.1804893  |
| H | 1.9632655  | -0.7385479 | 1.3435216  |
| C | 1.6104510  | -0.8535285 | 3.4681409  |
| H | 2.5418704  | -1.3450973 | 3.7183393  |
| C | 0.6425420  | -0.4819404 | 4.4528969  |
| N | 0.8960928  | -0.7032716 | 5.7728503  |
| H | 0.1329835  | -0.5541094 | 6.4182942  |
| H | 1.6410536  | -1.3224036 | 6.0517578  |
| N | -0.5114617 | 0.1092485  | 4.1646632  |
| C | -0.8182791 | 0.3999182  | 2.8713461  |
| O | -1.8913261 | 0.9240555  | 2.5303453  |
| H | -0.0375615 | 0.3484326  | 0.8969200  |
| O | -3.3821871 | 0.4143977  | 0.3972263  |
| H | -3.9943944 | 1.1623587  | 0.3704990  |
| H | -2.8013906 | 0.5942418  | 1.1932901  |

32

G91C2AW1 TS

|   |            |           |           |
|---|------------|-----------|-----------|
| N | -1.0970387 | 0.9345283 | 3.3530002 |
| C | 0.1565433  | 0.5418718 | 3.1199080 |
| N | 1.3037062  | 0.9434006 | 3.7703359 |

|   |            |            |            |
|---|------------|------------|------------|
| H | 1.3529893  | 1.5888743  | 4.5460798  |
| C | 2.3638964  | 0.3162426  | 3.1439627  |
| H | 3.3842371  | 0.4778405  | 3.4605243  |
| N | 1.9899694  | -0.4611727 | 2.1557592  |
| C | 0.6051902  | -0.3426644 | 2.1290745  |
| C | -0.4023210 | -0.8650273 | 1.3001104  |
| O | -0.0955421 | -1.7374061 | 0.3360523  |
| H | -0.8384849 | -1.7899913 | -0.3077037 |
| N | -1.6671060 | -0.4913667 | 1.4727997  |
| C | -1.9536690 | 0.3703620  | 2.4813418  |
| N | -3.2831823 | 0.6622293  | 2.6462452  |
| H | -3.8864795 | 0.4617270  | 1.8623381  |
| H | -3.5001108 | 1.4764503  | 3.2021798  |
| N | -1.6440506 | 0.1348849  | -3.6667152 |
| C | -0.9539696 | 1.1004460  | -4.3144997 |
| H | -1.5049928 | 1.6423832  | -5.0787524 |
| C | 0.3618730  | 1.4083655  | -4.0473756 |
| H | 0.8761026  | 2.1961284  | -4.5865925 |
| C | 1.0073025  | 0.6557876  | -3.0324523 |
| N | 2.2813594  | 0.8601306  | -2.6473356 |
| H | 2.6632629  | 0.2928345  | -1.8724894 |
| H | 2.8339950  | 1.5785881  | -3.0858749 |
| N | 0.3381323  | -0.3282684 | -2.3866922 |
| C | -0.9211900 | -0.5036122 | -2.7476829 |
| O | -1.5716073 | -1.4936590 | -2.0582771 |
| H | -2.4893415 | -1.4816072 | -2.3806968 |
| O | 2.8032185  | -1.0223588 | -0.6148914 |
| H | 1.9090542  | -1.3359779 | -0.8451820 |
| H | 2.7352156  | -0.8761294 | 0.3545994  |

32

G92C1W1 TS

|   |            |            |            |
|---|------------|------------|------------|
| N | -1.3910386 | -0.7469697 | -1.7591552 |
| C | -0.8688520 | 0.4542816  | -1.4841553 |
| N | -1.5044561 | 1.5333627  | -0.9286503 |
| H | -2.4142658 | 1.4579997  | -0.4267396 |
| C | -0.5499510 | 2.5047558  | -0.7775134 |
| H | -0.7818372 | 3.4493360  | -0.3067056 |
| N | 0.6415898  | 2.1716332  | -1.2345061 |
| C | 0.4584055  | 0.8713492  | -1.6940711 |
| C | 1.2941815  | -0.1037861 | -2.2423146 |
| O | 2.6042423  | 0.1387849  | -2.4816256 |
| H | 2.9522345  | -0.6886226 | -2.8623589 |
| N | 0.8287718  | -1.3142358 | -2.5370310 |
| C | -0.4768801 | -1.5796944 | -2.2783527 |
| N | -0.8812991 | -2.8702222 | -2.5397265 |
| H | -0.3069032 | -3.3822782 | -3.1941181 |
| H | -1.8795723 | -2.9997988 | -2.6281236 |
| N | -0.0680599 | -1.2114368 | 3.3775566  |
| C | 1.2793932  | -1.3251853 | 3.4966664  |
| H | 1.6503853  | -2.0584769 | 4.2037523  |
| C | 2.0923802  | -0.5373317 | 2.7474721  |
| H | 3.1693931  | -0.6092239 | 2.8311895  |
| C | 1.4517700  | 0.3882629  | 1.8521814  |
| N | 2.2043981  | 1.2220244  | 1.1044836  |
| H | 1.7576938  | 1.7534221  | 0.3485414  |
| H | 3.2008197  | 1.0757795  | 1.0477154  |
| N | 0.1246711  | 0.4844815  | 1.7332859  |
| C | -0.6836163 | -0.3024689 | 2.4826636  |
| O | -1.9238603 | -0.2964185 | 2.4582222  |
| H | -0.6989382 | -1.7884250 | 3.9194363  |
| O | -3.6290176 | 0.7367690  | 0.6073968  |
| H | -3.8289672 | -0.0680061 | 0.1056602  |
| H | -3.0124185 | 0.4175531  | 1.3201584  |



32

G92C2AW1 TS

|   |            |            |            |
|---|------------|------------|------------|
| N | 2.9941418  | 0.9155607  | 1.1747162  |
| C | 2.7379542  | 0.7677056  | -0.1271856 |
| N | 3.2393330  | 1.5162988  | -1.1710678 |
| H | 3.8711450  | 2.3006307  | -1.0889775 |
| C | 2.7062934  | 1.0012557  | -2.3337293 |
| H | 2.9380254  | 1.4212988  | -3.3015887 |
| N | 1.9119007  | -0.0200698 | -2.1179947 |
| C | 1.9128685  | -0.1861959 | -0.7359494 |
| C | 1.2745833  | -1.0959288 | 0.1387418  |
| O | 0.4817181  | -2.0854232 | -0.2284905 |
| H | 0.1876950  | -1.9789255 | -1.1992482 |
| N | 1.4799301  | -0.9600919 | 1.4556988  |
| C | 2.3121584  | 0.0119622  | 1.8991304  |
| N | 2.4262161  | 0.1047431  | 3.2674882  |
| H | 2.2153049  | -0.7408261 | 3.7786598  |
| H | 3.2147442  | 0.6417254  | 3.6009016  |
| N | -4.0770266 | 0.7710344  | -0.6732445 |
| C | -4.4729056 | 0.7569026  | 0.6179745  |
| H | -5.5017612 | 1.0562982  | 0.8018763  |
| C | -3.6514184 | 0.3858435  | 1.6594541  |
| H | -4.0084628 | 0.3800242  | 2.6833694  |
| C | -2.3234703 | 0.0134663  | 1.3305809  |
| N | -1.4264628 | -0.3621124 | 2.2674680  |
| H | -0.5006414 | -0.7006277 | 2.0011820  |
| H | -1.7171464 | -0.4624841 | 3.2262714  |
| N | -1.9002085 | 0.0361560  | 0.0481309  |
| C | -2.8076759 | 0.3994382  | -0.8436753 |
| O | -2.3671857 | 0.3806934  | -2.1392489 |
| H | -3.1355735 | 0.6443798  | -2.6754354 |
| O | -0.2628013 | -1.6231440 | -2.7102576 |
| H | 0.5102180  | -1.0202551 | -2.8459815 |
| H | -1.0146456 | -1.0124428 | -2.5824618 |

35

G19C1W2 HB

|   |            |            |            |
|---|------------|------------|------------|
| N | -1.2479319 | -0.1007836 | 5.0786438  |
| C | -0.0114299 | 0.0346469  | 5.6915642  |
| H | 0.0834637  | 0.0486209  | 6.7682674  |
| N | 0.9742111  | 0.1388582  | 4.8368619  |
| C | 0.3613993  | 0.0693546  | 3.5950755  |
| C | 0.9077525  | 0.1158703  | 2.2786400  |
| O | 2.0962799  | 0.2301528  | 1.9276372  |
| N | -0.1037086 | 0.0093380  | 1.3024320  |
| H | 0.2213529  | 0.0296843  | 0.3150954  |
| C | -1.4479676 | -0.1341878 | 1.5458282  |
| N | -2.2555414 | -0.2315551 | 0.4667421  |
| H | -1.9101599 | -0.1600507 | -0.4954253 |
| H | -3.2433867 | -0.3187764 | 0.6441156  |
| N | -1.9700138 | -0.1860730 | 2.7661310  |
| C | -1.0259254 | -0.0804510 | 3.7229857  |
| H | -2.1479691 | -0.1990315 | 5.5278540  |
| N | 0.4472735  | -0.1291047 | -3.7697761 |
| C | 1.7782935  | -0.1391569 | -4.0378313 |
| H | 2.0501564  | -0.1962117 | -5.0857371 |
| C | 2.6939897  | -0.0778807 | -3.0365043 |
| H | 3.7554891  | -0.0843443 | -3.2483271 |
| C | 2.1873835  | -0.0042302 | -1.6965243 |
| N | 3.0099058  | 0.0568234  | -0.6453311 |
| H | 2.6431773  | 0.1243265  | 0.3321153  |
| H | 4.0070433  | 0.0484903  | -0.7958895 |
| N | 0.8629680  | 0.0085447  | -1.4483279 |
| C | -0.0276668 | -0.0481441 | -2.4616328 |
| O | -1.2693065 | -0.0324563 | -2.2600378 |

|   |            |            |            |
|---|------------|------------|------------|
| H | -0.2278848 | -0.1886405 | -4.5574827 |
| O | -1.2647320 | -0.1277263 | -5.9864675 |
| H | -1.5327632 | -0.9565339 | -6.4074741 |
| H | -2.0612394 | 0.1638009  | -5.4623518 |
| O | -3.1142050 | 0.5055821  | -4.1510658 |
| H | -3.3861399 | 1.4239519  | -4.0157554 |
| H | -2.4768889 | 0.3072165  | -3.4102718 |

35

G19C2AW2 HB

|   |            |            |            |
|---|------------|------------|------------|
| C | 1.4188902  | -2.0426562 | 0.0516829  |
| N | 0.6174939  | -3.1312650 | 0.1196659  |
| H | 1.0732392  | -4.0288631 | 0.0715654  |
| H | -0.3887196 | -3.0762240 | -0.0080122 |
| N | 0.8043367  | -0.8150891 | -0.0097989 |
| H | -0.2354355 | -0.7692143 | -0.0233648 |
| C | 1.4704344  | 0.4224617  | -0.0516131 |
| O | 0.7960074  | 1.4698066  | -0.1089148 |
| C | 2.8822834  | 0.2675029  | -0.0191855 |
| N | 3.8987202  | 1.2097430  | -0.0330684 |
| C | 4.9969488  | 0.4991466  | 0.0098889  |
| H | 6.0031838  | 0.8936407  | 0.0146437  |
| N | 4.7585607  | -0.8667651 | 0.0514574  |
| H | 5.4453500  | -1.6076529 | 0.0888965  |
| C | 3.3960135  | -1.0338395 | 0.0356814  |
| N | 2.7355818  | -2.2074466 | 0.0694678  |
| C | -2.7993310 | 0.5679007  | 0.0624959  |
| N | -2.0126183 | 1.6421866  | 0.1133073  |
| H | -0.9948672 | 1.5302628  | 0.0434271  |
| H | -2.3657173 | 2.5995856  | 0.1496453  |
| N | -2.1875109 | -0.6509518 | -0.0251154 |
| C | -2.9985472 | -1.6990320 | -0.0784747 |
| O | -2.3565524 | -2.9065571 | -0.1672083 |
| H | -3.0690552 | -3.5690621 | -0.1973282 |
| N | -4.3241333 | -1.7561855 | -0.0598128 |
| C | -4.9170650 | -0.5403762 | 0.0333953  |
| H | -6.0035970 | -0.5458195 | 0.0556856  |
| C | -4.2187205 | 0.6401852  | 0.0980314  |
| H | -4.7239731 | 1.5958470  | 0.1739717  |
| O | -1.9825827 | 4.5337949  | 0.1703677  |
| H | -0.9958070 | 4.4873648  | 0.0939052  |
| H | -2.2552819 | 5.0378220  | -0.6083319 |
| O | 0.7527575  | 4.1986021  | -0.2022360 |
| H | 1.3993786  | 4.5749097  | 0.4101375  |
| H | 0.9475949  | 3.2308299  | -0.2089741 |

35

G19C2BW2 HB

|   |            |            |            |
|---|------------|------------|------------|
| C | 0.0531203  | -1.8925490 | -1.8288219 |
| N | 0.1463392  | -1.1479113 | -2.9705641 |
| H | -0.0948273 | -1.6341406 | -3.8215340 |
| H | -0.0264362 | -0.1501508 | -2.9443257 |
| N | 0.1079207  | -1.2142048 | -0.6438542 |
| H | 0.1417457  | -0.1727038 | -0.6714849 |
| C | 0.0839519  | -1.7902022 | 0.6510182  |
| O | 0.1329811  | -1.0559270 | 1.6433436  |
| C | -0.0025243 | -3.2181547 | 0.5585700  |
| N | -0.0540589 | -4.1886460 | 1.5470433  |
| C | -0.1381395 | -5.3231529 | 0.8971200  |
| H | -0.1962156 | -6.3040730 | 1.3461496  |
| N | -0.1462056 | -5.1510585 | -0.4748373 |
| H | -0.2003137 | -5.8722773 | -1.1807861 |
| C | -0.0590603 | -3.7995067 | -0.7118106 |
| N | -0.0394343 | -3.2101252 | -1.9274758 |
| C | -0.0182726 | 4.3533772  | -0.1655512 |

|   |            |            |            |
|---|------------|------------|------------|
| N | -0.0599048 | 5.6902162  | 0.0100137  |
| H | -0.0849902 | 6.0932880  | 0.9442035  |
| H | -0.1792867 | 6.2795402  | -0.7998870 |
| C | 0.0847817  | 3.4531955  | 0.9230848  |
| H | 0.1241383  | 3.8086846  | 1.9454128  |
| C | 0.1306082  | 2.1109336  | 0.6267275  |
| H | 0.2033815  | 1.3457444  | 1.3960873  |
| N | 0.0833656  | 1.6395819  | -0.6423151 |
| C | -0.0165764 | 2.5769179  | -1.5788348 |
| O | -0.0718115 | 2.0996767  | -2.8534719 |
| H | -0.1452886 | 2.8799904  | -3.4296249 |
| N | -0.0718019 | 3.8956981  | -1.4375831 |
| O | 0.0328207  | -2.6887903 | 4.1787352  |
| H | -0.0061221 | -3.4330187 | 3.5497734  |
| H | 0.0811507  | -1.9394361 | 3.5583890  |
| O | -0.1179450 | 6.6510283  | 2.8107869  |
| H | 0.6765452  | 6.5501014  | 3.3546993  |
| H | -0.8486330 | 6.3695352  | 3.3800909  |

35

G17C1W2 HB

|   |            |            |            |
|---|------------|------------|------------|
| N | -1.9632151 | 2.7831552  | -0.1625817 |
| C | -1.0386760 | 3.7687514  | -0.0623781 |
| N | -1.3120167 | 5.1211515  | -0.0633897 |
| C | -0.1292160 | 5.6993960  | 0.0534559  |
| H | 0.0366941  | 6.7673881  | 0.0878644  |
| N | 0.9078492  | 4.8153548  | 0.1311447  |
| H | 1.8917707  | 5.0248221  | 0.2215652  |
| C | 0.3420094  | 3.5559772  | 0.0580779  |
| C | 0.9031963  | 2.2593305  | 0.0817830  |
| O | 2.1124500  | 1.9432438  | 0.1759403  |
| N | -0.0988658 | 1.2923029  | -0.0190894 |
| H | 0.2178640  | 0.3016883  | -0.0107573 |
| C | -1.4495908 | 1.5656334  | -0.1356015 |
| N | -2.2658120 | 0.4899801  | -0.2308020 |
| H | -1.9270735 | -0.4732926 | -0.1833220 |
| H | -3.2524080 | 0.6793191  | -0.3071403 |
| N | 0.4460671  | -3.7807707 | -0.1137142 |
| C | 1.7752362  | -4.0535985 | -0.1001982 |
| H | 2.0442995  | -5.1032889 | -0.1349827 |
| C | 2.6942789  | -3.0542692 | -0.0442411 |
| H | 3.7548292  | -3.2706357 | -0.0317239 |
| C | 2.1910303  | -1.7121506 | -0.0011923 |
| N | 3.0188928  | -0.6624318 | 0.0551633  |
| H | 2.6578502  | 0.3155637  | 0.0998965  |
| H | 4.0149465  | -0.8185694 | 0.0650714  |
| N | 0.8692866  | -1.4577245 | -0.0129980 |
| C | -0.0262663 | -2.4693925 | -0.0629762 |
| O | -1.2650568 | -2.2629295 | -0.0672615 |
| H | -0.2330269 | -4.5666199 | -0.1660539 |
| O | -1.2854459 | -5.9768327 | -0.0823137 |
| H | -1.5451577 | -6.4217637 | -0.9011712 |
| H | -2.0842002 | -5.4415124 | 0.1830870  |
| O | -3.1406841 | -4.1246316 | 0.4633986  |
| H | -3.4516937 | -3.9570403 | 1.3638461  |
| H | -2.4947392 | -3.3916722 | 0.2656458  |

35

G17C2AW2 HB

|   |            |            |            |
|---|------------|------------|------------|
| N | -1.7269620 | -0.0256210 | 2.6964638  |
| C | -2.7010983 | -0.0206193 | 1.7528177  |
| N | -4.0467343 | 0.0209616  | 2.0101433  |
| C | -4.6051552 | 0.0083815  | 0.8061725  |
| H | -5.6713169 | 0.0312928  | 0.6260519  |
| N | -3.7223677 | -0.0370438 | -0.2251574 |

|   |            |            |            |
|---|------------|------------|------------|
| H | -3.9690020 | -0.0762621 | -1.2315152 |
| C | -2.4706317 | -0.0567404 | 0.3613939  |
| C | -1.1616011 | -0.0863536 | -0.1551337 |
| O | -0.7746773 | -0.1093352 | -1.3594579 |
| N | -0.2091716 | -0.0940991 | 0.8617776  |
| H | 0.7802279  | -0.0929547 | 0.5545322  |
| C | -0.5064348 | -0.0761648 | 2.2096313  |
| N | 0.5542004  | -0.1694000 | 3.0663372  |
| H | 1.4840652  | 0.0941115  | 2.7572008  |
| H | 0.3205465  | 0.0306037  | 4.0286315  |
| N | 4.9812107  | 0.2037450  | 0.4018720  |
| C | 5.2475720  | -0.0332139 | -0.9022768 |
| H | 6.2988199  | -0.0364679 | -1.1775620 |
| C | 4.2719322  | -0.2564004 | -1.8462875 |
| H | 4.5236425  | -0.4380791 | -2.8848190 |
| C | 2.9241776  | -0.2335351 | -1.4067714 |
| N | 1.8829066  | -0.4349382 | -2.2315778 |
| H | 0.9127499  | -0.3451156 | -1.8915953 |
| H | 2.0463531  | -0.5807863 | -3.2151596 |
| N | 2.6380200  | -0.0068245 | -0.0986429 |
| C | 3.6847912  | 0.1968054  | 0.6938797  |
| O | 3.3653641  | 0.4344920  | 1.9978661  |
| H | 4.2163587  | 0.5541896  | 2.4552068  |
| O | -4.4477218 | -0.0384845 | -2.9357904 |
| H | -3.5764243 | 0.2184746  | -3.3445051 |
| H | -4.6930885 | -0.8701167 | -3.3644244 |
| O | -1.9293605 | 0.5849688  | -3.6759607 |
| H | -1.5208450 | 0.3454092  | -2.7991996 |
| H | -1.7399728 | 1.5261194  | -3.7955039 |

35

G17C2BW2 HB

|   |            |            |            |
|---|------------|------------|------------|
| N | 2.6022266  | -0.0234920 | -2.0861298 |
| C | 1.5931838  | 0.0133986  | -2.9957966 |
| N | 1.7651558  | 0.0256009  | -4.3571816 |
| C | 0.5276003  | 0.0622718  | -4.8374824 |
| H | 0.2800353  | 0.0805338  | -5.8901515 |
| N | -0.4435022 | 0.0734392  | -3.8888306 |
| H | -1.4626536 | 0.1182968  | -4.0700183 |
| C | 0.2198094  | 0.0430141  | -2.6763091 |
| C | -0.2224325 | 0.0284148  | -1.3335797 |
| O | -1.3840246 | 0.0432168  | -0.8540301 |
| N | 0.8654007  | -0.0032445 | -0.4555864 |
| H | 0.6329902  | -0.0128797 | 0.5557118  |
| C | 2.1880508  | -0.0261467 | -0.8378168 |
| N | 3.1053039  | -0.0428717 | 0.1703448  |
| H | 2.8499869  | -0.1068392 | 1.1447426  |
| H | 4.0742867  | -0.1022497 | -0.0980558 |
| N | 0.1316480  | -0.0124362 | 2.3387771  |
| C | -1.2064287 | 0.0775185  | 2.5039968  |
| H | -1.7805012 | 0.1124497  | 1.5814639  |
| C | -1.8032131 | 0.1249961  | 3.7456560  |
| H | -2.8797403 | 0.1949752  | 3.8497819  |
| C | -0.9476576 | 0.0770375  | 4.8675816  |
| N | -1.4142438 | 0.0803210  | 6.1447595  |
| H | -0.7424559 | 0.1933466  | 6.8901779  |
| H | -2.3720495 | 0.3330627  | 6.3311386  |
| N | 0.3897684  | -0.0102910 | 4.7214849  |
| C | 0.8313579  | -0.0519596 | 3.4683914  |
| O | 2.1760239  | -0.1433548 | 3.2995375  |
| H | 2.5670909  | -0.1589754 | 4.1902216  |
| O | -3.7971945 | -0.3724293 | -1.8855409 |
| H | -2.8823332 | -0.2066871 | -1.5140063 |
| H | -3.9951246 | -1.2925148 | -1.6628166 |
| O | -3.2004484 | 0.1313129  | -4.4497978 |

|   |            |            |            |
|---|------------|------------|------------|
| H | -3.5988534 | 0.9819881  | -4.6801014 |
| H | -3.5495377 | -0.0804420 | -3.5389402 |

35

G91C1W2 HB

|   |            |            |            |
|---|------------|------------|------------|
| N | -0.0148006 | -2.6834402 | 3.8716714  |
| C | -0.0386950 | -1.3413686 | 3.5531012  |
| H | -0.2569819 | -2.8882166 | 4.8317536  |
| H | -0.4105572 | -3.3076604 | 3.1827292  |
| N | 0.0129196  | -0.4999935 | 4.6098277  |
| N | -0.0689158 | -1.0247097 | 2.2438349  |
| C | 0.0464395  | 0.8034057  | 4.3657925  |
| O | 0.0950009  | 1.6209360  | 5.4392824  |
| H | 0.1101639  | 2.5345424  | 5.1016476  |
| C | 0.0233965  | 1.2834002  | 3.0510201  |
| N | 0.0404440  | 2.5573645  | 2.5045009  |
| C | -0.0354470 | 0.3054586  | 2.0500551  |
| N | -0.0538436 | 0.9964867  | 0.8709254  |
| C | -0.0055865 | 2.3328507  | 1.2067515  |
| H | -0.0751860 | 0.5585918  | -0.0740184 |
| H | -0.0082438 | 3.0955292  | 0.4411773  |
| C | 0.0186904  | -1.9133196 | -1.4979068 |
| N | 0.0229428  | -2.5250342 | -0.2997129 |
| H | -0.0068209 | -2.0019016 | 0.5934938  |
| H | 0.1170213  | -3.5280264 | -0.2634549 |
| C | 0.0861592  | -2.6832747 | -2.7045233 |
| H | 0.1467816  | -3.7639422 | -2.6961083 |
| C | 0.0717900  | -1.9899132 | -3.8740801 |
| H | 0.1224883  | -2.4709482 | -4.8449239 |
| N | -0.0055905 | -0.6372624 | -3.8841693 |
| H | -0.0122200 | -0.1404704 | -4.7972225 |
| C | -0.0633095 | 0.1052230  | -2.6966545 |
| O | -0.1205176 | 1.3483260  | -2.7377299 |
| N | -0.0523824 | -0.5755973 | -1.5180513 |
| H | -0.0915451 | 2.3478061  | -4.0983409 |
| O | -0.0428935 | 2.8523513  | -4.9591996 |
| H | 0.7040520  | 3.4581429  | -4.8575012 |
| O | 0.1083717  | 0.6013450  | -6.3970244 |
| H | 0.1108040  | 1.5270066  | -6.0231682 |
| H | -0.6598761 | 0.5730287  | -6.9842448 |

35

G91C2AW2 HB

|   |            |            |            |
|---|------------|------------|------------|
| N | -1.2419740 | 0.0138575  | -0.6862762 |
| C | -1.4445080 | -0.0071045 | 0.6436191  |
| N | -0.5117664 | 0.0377892  | 1.6419117  |
| H | 0.5085855  | 0.0092404  | 1.4815297  |
| C | -1.2169185 | -0.0164127 | 2.8306290  |
| H | -0.7057715 | -0.0020572 | 3.7822750  |
| N | -2.5209657 | -0.0805351 | 2.6692910  |
| C | -2.6793785 | -0.0793153 | 1.2909416  |
| C | -3.7996085 | -0.1396605 | 0.4476332  |
| O | -5.0605139 | -0.1939161 | 0.9243550  |
| H | -5.0008771 | -0.1804717 | 1.8965432  |
| N | -3.6596829 | -0.1506983 | -0.8684610 |
| C | -2.4061767 | -0.0872965 | -1.3822824 |
| N | -2.3120345 | -0.1408502 | -2.7311973 |
| H | -3.1698588 | -0.1320431 | -3.2592065 |
| H | -1.4129222 | -0.0507173 | -3.2027948 |
| N | 4.5758070  | 0.1573599  | 1.0815481  |
| C | 4.8525136  | -0.3433009 | -0.1424588 |
| H | 5.9051635  | -0.3794261 | -0.4114897 |
| C | 3.8881385  | -0.7893373 | -1.0187453 |
| H | 4.1486350  | -1.1910859 | -1.9910255 |
| C | 2.5398203  | -0.7098726 | -0.5927852 |

|   |            |            |            |
|---|------------|------------|------------|
| N | 1.5131148  | -1.1594578 | -1.3472720 |
| H | 0.5615185  | -0.8711040 | -1.1010091 |
| H | 1.6662165  | -1.2757591 | -2.3409584 |
| N | 2.2405108  | -0.1908649 | 0.6241729  |
| C | 3.2768594  | 0.1935181  | 1.3696734  |
| O | 2.9318902  | 0.6921585  | 2.5820781  |
| H | 3.7715617  | 0.9324716  | 3.0124306  |
| O | 0.5235314  | 1.9692557  | -1.7715478 |
| H | 1.2864386  | 2.0335313  | -1.1790467 |
| H | -0.0986098 | 1.3504077  | -1.3072760 |
| O | 0.4779156  | 0.2267523  | -3.8671895 |
| H | 0.6485930  | 0.9437388  | -3.2017242 |
| H | 0.5447563  | 0.6573707  | -4.7303540 |

35

G91C2BW2 HB

|   |            |            |            |
|---|------------|------------|------------|
| N | 2.1427589  | -2.1761318 | -0.2455660 |
| C | 1.5012357  | -3.3336993 | -0.1100704 |
| N | 2.0480275  | -4.6017894 | -0.0929782 |
| H | 3.0296199  | -4.8251061 | -0.1844873 |
| C | 1.0119769  | -5.4955588 | 0.0668737  |
| H | 1.1785238  | -6.5619939 | 0.1097939  |
| N | -0.1565732 | -4.9035634 | 0.1550746  |
| C | 0.1230385  | -3.5432787 | 0.0468652  |
| C | -0.6695699 | -2.3746114 | 0.0568999  |
| O | -1.9950004 | -2.3418102 | 0.1801325  |
| H | -2.3790404 | -3.2698109 | 0.2687145  |
| N | -0.0687914 | -1.1942201 | -0.0739006 |
| C | 1.2830946  | -1.1346096 | -0.2202628 |
| N | 1.8015590  | 0.1060744  | -0.3736035 |
| H | 1.2113956  | 0.9331303  | -0.2572242 |
| H | 2.8022573  | 0.1917880  | -0.4547775 |
| N | -0.2565398 | 4.9630784  | 0.0108850  |
| C | -1.5648310 | 4.7894547  | -0.2778043 |
| H | -2.1402025 | 5.7016483  | -0.4107701 |
| C | -2.1622667 | 3.5563680  | -0.3960569 |
| H | -3.2185411 | 3.4592554  | -0.6195118 |
| C | -1.3370278 | 2.4170157  | -0.2203097 |
| N | -1.8040369 | 1.1608737  | -0.3103114 |
| H | -1.1889629 | 0.3417038  | -0.1880399 |
| H | -2.7777481 | 1.0022596  | -0.5155909 |
| N | -0.0160271 | 2.5729744  | 0.0518920  |
| C | 0.4210160  | 3.8297719  | 0.1634513  |
| O | 1.7316613  | 3.9887633  | 0.4748377  |
| H | 2.0867375  | 3.0974911  | 0.6294785  |
| O | 1.1816347  | 7.5160870  | 0.3604480  |
| H | 0.6670877  | 6.6882121  | 0.2342305  |
| H | 2.0648327  | 7.1907033  | 0.5819941  |
| O | -2.8652230 | -4.8596299 | 0.3737044  |
| H | -1.9229657 | -5.1835558 | 0.3257182  |
| H | -3.1877060 | -5.1174983 | 1.2491157  |

35

G92C1W2 HB

|   |            |            |            |
|---|------------|------------|------------|
| N | -0.9998737 | 2.2340025  | -0.1455171 |
| C | 0.3279874  | 2.0571824  | -0.0165593 |
| N | 1.0079748  | 0.8765361  | 0.0433824  |
| H | 0.5676190  | -0.0653321 | 0.0079638  |
| C | 2.3406888  | 1.2094507  | 0.1787121  |
| H | 3.0965342  | 0.4400704  | 0.2499973  |
| N | 2.5719127  | 2.5033892  | 0.2076183  |
| C | 1.3085638  | 3.0624403  | 0.0857999  |
| C | 0.8065509  | 4.3676292  | 0.0407364  |
| O | 1.6150853  | 5.4407095  | 0.1230938  |
| H | 1.0278253  | 6.2171902  | 0.0696272  |

|   |            |            |            |
|---|------------|------------|------------|
| N | -0.5017429 | 4.5926603  | -0.0935566 |
| C | -1.3355437 | 3.5336680  | -0.1759443 |
| N | -2.6810205 | 3.8370575  | -0.2551010 |
| H | -2.8780506 | 4.7830028  | -0.5531542 |
| H | -3.2602026 | 3.1275352  | -0.6827584 |
| N | -0.6320436 | -3.8843242 | 0.0800376  |
| C | -1.9834838 | -3.8726952 | 0.1706246  |
| H | -2.4646974 | -4.8428864 | 0.2296149  |
| C | -2.6762592 | -2.7023930 | 0.1832231  |
| H | -3.7563025 | -2.6927487 | 0.2541055  |
| C | -1.9060063 | -1.4976773 | 0.0889599  |
| N | -2.5149894 | -0.2975888 | 0.0866864  |
| H | -1.9888801 | 0.5899792  | 0.0061504  |
| H | -3.5168142 | -0.2554428 | 0.1893245  |
| N | -0.5700307 | -1.5194854 | -0.0030944 |
| C | 0.1102917  | -2.6982137 | -0.0073606 |
| O | 1.3522584  | -2.7405425 | -0.0820714 |
| H | -0.1355700 | -4.7976994 | 0.0785870  |
| O | 2.8253687  | -4.9683169 | -0.3052174 |
| H | 3.3151803  | -4.8945305 | -1.1357465 |
| H | 2.3316567  | -4.1043354 | -0.2124054 |
| O | 0.5915688  | -6.4064591 | -0.0210783 |
| H | 0.6831648  | -6.9230827 | 0.7917310  |
| H | 1.5038881  | -6.0367442 | -0.1919300 |

35

G92C2AW2 HB

|   |            |            |            |
|---|------------|------------|------------|
| N | -1.8347723 | -0.1364802 | 3.5945046  |
| C | -0.6422044 | -0.0214702 | 4.1896227  |
| N | -0.3807533 | 0.0187779  | 5.5381094  |
| H | -1.0672095 | -0.0244881 | 6.2784069  |
| C | 0.9951805  | 0.1344770  | 5.6736607  |
| H | 1.4585813  | 0.1886316  | 6.6488994  |
| N | 1.6291091  | 0.1687358  | 4.5294910  |
| C | 0.6187554  | 0.0730889  | 3.5812243  |
| C | 0.6176520  | 0.0445691  | 2.1742743  |
| O | 1.7320917  | 0.1104710  | 1.4804040  |
| H | 1.5490014  | 0.0438621  | 0.4616114  |
| N | -0.5698222 | -0.0531078 | 1.5373418  |
| C | -1.7199287 | -0.1369507 | 2.2609446  |
| N | -2.8896263 | -0.1825901 | 1.5424135  |
| H | -2.8488672 | -0.4928940 | 0.5819195  |
| H | -3.7039765 | -0.4653601 | 2.0687687  |
| N | 1.4063685  | -0.0521606 | -1.1321504 |
| C | 2.5167293  | -0.1204472 | -1.8985624 |
| H | 3.4579811  | -0.1558753 | -1.3569251 |
| C | 2.4832693  | -0.1421889 | -3.2690721 |
| H | 3.3937644  | -0.1942921 | -3.8543689 |
| C | 1.2032397  | -0.0843216 | -3.8827005 |
| N | 1.0589982  | -0.0876387 | -5.2198018 |
| H | 0.1415053  | -0.0122136 | -5.6863981 |
| H | 1.8847623  | -0.0908689 | -5.7975131 |
| N | 0.0838369  | -0.0258827 | -3.1261996 |
| C | 0.2355811  | -0.0088644 | -1.7965290 |
| O | -0.8824139 | 0.0667032  | -1.0923479 |
| H | -0.6775204 | 0.0396906  | -0.0757777 |
| O | -1.4352211 | 0.2006605  | -6.5806786 |
| H | -1.7801144 | -0.5730599 | -7.0473804 |
| H | -1.9913246 | 0.2653892  | -5.7577969 |
| O | -2.5396939 | 0.1564598  | -4.1277622 |
| H | -1.6429168 | 0.0625168  | -3.7011140 |
| H | -2.9400942 | 0.9198874  | -3.6889397 |

35

G92C2BW2 HB

|   |            |            |            |
|---|------------|------------|------------|
| N | 3.3819259  | -0.0955280 | 1.4920210  |
| C | 3.5737195  | -0.0715444 | 0.1634143  |
| N | 4.7820659  | -0.1146679 | -0.4896090 |
| H | 5.6907542  | -0.1680968 | -0.0498897 |
| C | 4.5087374  | -0.0720437 | -1.8490340 |
| H | 5.3029938  | -0.0949729 | -2.5816835 |
| N | 3.2286378  | -0.0041120 | -2.1138876 |
| C | 2.6246091  | -0.0004821 | -0.8654692 |
| C | 1.2612908  | 0.0597605  | -0.4905317 |
| O | 0.2528113  | 0.1363523  | -1.2373199 |
| H | -1.3927844 | 0.0545485  | -0.7882999 |
| N | 1.0780507  | 0.0237714  | 0.8920650  |
| C | 2.0908681  | -0.0505945 | 1.8231393  |
| N | 1.7464336  | -0.0946840 | 3.1238380  |
| H | 0.7878674  | 0.0356554  | 3.4845944  |
| H | 2.5146795  | -0.0795198 | 3.7771540  |
| N | -3.8628770 | -0.0736979 | 1.3770972  |
| C | -4.8509926 | -0.1459456 | 0.4774163  |
| H | -5.8549176 | -0.2008196 | 0.8961032  |
| C | -4.7015132 | -0.1561352 | -0.9022513 |
| H | -5.5535469 | -0.2157181 | -1.5678972 |
| C | -3.3939583 | -0.0815877 | -1.4080942 |
| N | -3.0844011 | -0.0870159 | -2.7154174 |
| H | -2.1257355 | 0.0148614  | -3.0937823 |
| H | -3.8458428 | -0.0946558 | -3.3760713 |
| N | -2.3913446 | -0.0068279 | -0.4925405 |
| C | -2.6069798 | -0.0025526 | 0.8893272  |
| O | -1.5835342 | 0.0695336  | 1.6206502  |
| H | 0.0789587  | 0.0505496  | 1.1965080  |
| O | -0.4983170 | 0.3189634  | -3.7748144 |
| H | 0.0297652  | 0.2920225  | -2.9362425 |
| H | -0.0456766 | -0.2920843 | -4.3716505 |
| O | -0.8755607 | 0.3138682  | 4.1623210  |
| H | -1.3735881 | 0.2602716  | 3.3043433  |
| H | -1.2689744 | -0.3735302 | 4.7169440  |

35

G19C1W2 ST

|   |            |            |            |
|---|------------|------------|------------|
| N | -2.2175672 | 1.1929609  | 2.1842136  |
| C | -3.2074373 | 0.8106761  | 1.2984678  |
| H | -4.1760813 | 1.2889530  | 1.2880288  |
| N | -2.8279920 | -0.1672244 | 0.5116940  |
| C | -1.5268283 | -0.4484532 | 0.9005525  |
| C | -0.5858456 | -1.3974580 | 0.3849903  |
| O | -0.7167341 | -2.2336277 | -0.5146714 |
| N | 0.6557806  | -1.2703917 | 1.0525936  |
| H | 1.4457184  | -1.7895795 | 0.6516441  |
| C | 0.9398744  | -0.4022239 | 2.0783276  |
| N | 2.1804726  | -0.4912713 | 2.6242137  |
| H | 2.9154579  | -0.9258818 | 2.0682606  |
| H | 2.4447042  | 0.2845347  | 3.2141485  |
| N | 0.0651320  | 0.4663190  | 2.5701353  |
| C | -1.1245521 | 0.3925049  | 1.9398091  |
| H | -2.2852502 | 1.8963826  | 2.9071465  |
| N | 1.2026410  | 2.1044458  | -0.5737041 |
| C | -0.0846653 | 2.3020866  | -0.9696275 |
| H | -0.6070084 | 3.1442135  | -0.5309518 |
| C | -0.6527887 | 1.4543081  | -1.8616100 |
| H | -1.6797253 | 1.5729798  | -2.1785221 |
| C | 0.1635758  | 0.3727192  | -2.3374761 |
| N | -0.3544956 | -0.5000432 | -3.2280624 |
| H | 0.2107277  | -1.3291282 | -3.3699804 |
| H | -1.3660317 | -0.6729497 | -3.1594885 |
| N | 1.4284977  | 0.1879063  | -1.9440238 |
| C | 1.9749881  | 1.0163143  | -1.0275068 |



|   |            |            |            |
|---|------------|------------|------------|
| O | 3.1070152  | 0.8693829  | -0.5250233 |
| H | 1.6331074  | 2.6871668  | 0.1330629  |
| O | -2.8814231 | -1.4304907 | -2.1870138 |
| H | -2.2288749 | -1.9672462 | -1.6844332 |
| H | -3.2342161 | -0.8782656 | -1.4615848 |
| O | 3.4341876  | -1.6344194 | 0.2884818  |
| H | 3.4328823  | -0.7560016 | -0.1909733 |
| H | 3.8393292  | -2.2730374 | -0.3114793 |

35

G19C2AW2 ST

|   |            |            |            |
|---|------------|------------|------------|
| N | -2.9031646 | -1.5439670 | 1.2354233  |
| C | -3.6737719 | -0.4505657 | 0.8901784  |
| H | -4.6047740 | -0.2303497 | 1.3918510  |
| N | -3.1451920 | 0.2500814  | -0.0844354 |
| C | -1.9703297 | -0.4152167 | -0.3999227 |
| C | -0.9463002 | -0.0967335 | -1.3489321 |
| O | -0.8707549 | 0.8286504  | -2.1625387 |
| N | 0.1172005  | -1.0293886 | -1.2528391 |
| H | 0.9432149  | -0.8252560 | -1.8206522 |
| C | 0.1770789  | -2.1080202 | -0.4051773 |
| N | 1.2654678  | -2.9146487 | -0.5195649 |
| H | 2.0777478  | -2.5659029 | -1.0208370 |
| H | 1.4173961  | -3.5497280 | 0.2503543  |
| N | -0.7737780 | -2.4102667 | 0.4651387  |
| C | -1.7963742 | -1.5327778 | 0.4190554  |
| H | -3.1058218 | -2.2330273 | 1.9469944  |
| N | 2.0107137  | -0.1434484 | 1.8277122  |
| C | 0.7713801  | 0.2830787  | 2.1683301  |
| H | 0.2740160  | -0.2857438 | 2.9492411  |
| C | 0.1494760  | 1.3547161  | 1.5701781  |
| H | -0.8501303 | 1.6618536  | 1.8524636  |
| C | 0.8641490  | 2.0316146  | 0.5491723  |
| N | 0.3595118  | 3.1077495  | -0.0922320 |
| H | 0.8844114  | 3.3952886  | -0.9089106 |
| H | -0.6630158 | 3.1897992  | -0.1817166 |
| N | 2.1049896  | 1.6212775  | 0.1933096  |
| C | 2.5671159  | 0.5773138  | 0.8570895  |
| O | 3.8087898  | 0.1462161  | 0.4416844  |
| H | 4.0218609  | -0.5951491 | 1.0372428  |
| O | 3.0198115  | -1.0588838 | -2.0023104 |
| H | 3.4050193  | -0.7791349 | -2.8433203 |
| H | 3.4189525  | -0.4844208 | -1.3143478 |
| O | -2.3657123 | 2.9472880  | -1.0016599 |
| H | -2.9401817 | 2.2966225  | -0.5509941 |
| H | -1.9295088 | 2.3638465  | -1.6607022 |

35

G19C2BW2 ST

|   |            |            |            |
|---|------------|------------|------------|
| N | 3.8731147  | 0.2946024  | -0.9917388 |
| C | 3.6946289  | 1.6176154  | -0.6382761 |
| H | 4.3510640  | 2.3959816  | -0.9994306 |
| N | 2.6659778  | 1.7921186  | 0.1554521  |
| C | 2.1400493  | 0.5209615  | 0.3362087  |
| C | 1.0057985  | 0.0811620  | 1.0904646  |
| O | 0.2199322  | 0.7199247  | 1.7957913  |
| N | 0.8212476  | -1.3164918 | 0.9231021  |
| H | -0.0294463 | -1.7029428 | 1.3336659  |
| C | 1.5948971  | -2.1566430 | 0.1553343  |
| N | 1.2312185  | -3.4656903 | 0.1307770  |
| H | 0.2431316  | -3.6799824 | 0.3030687  |
| H | 1.7070311  | -4.0146820 | -0.5716749 |
| N | 2.6652841  | -1.7521774 | -0.5133663 |
| C | 2.8741091  | -0.4266317 | -0.3812675 |
| H | 4.5921782  | -0.0841679 | -1.5927172 |

|   |            |            |            |
|---|------------|------------|------------|
| N | -2.2896166 | -1.0202277 | -0.9059784 |
| C | -1.2763287 | -0.2478507 | -1.3709345 |
| H | -0.4766443 | -0.7799465 | -1.8786885 |
| C | -1.2170137 | 1.1112810  | -1.1957722 |
| H | -0.3718424 | 1.6950567  | -1.5375342 |
| C | -2.2773212 | 1.7108175  | -0.4699795 |
| N | -2.2703397 | 3.0277692  | -0.1627161 |
| H | -2.9836464 | 3.3164224  | 0.4946551  |
| H | -1.3442415 | 3.4519621  | -0.0266073 |
| N | -3.3384520 | 0.9737136  | -0.0749678 |
| C | -3.2624569 | -0.3323358 | -0.3042823 |
| O | -4.2922105 | -1.0880459 | 0.1523867  |
| H | -4.8943862 | -0.4635610 | 0.5935468  |
| O | 0.3415627  | 3.4478932  | 0.8982966  |
| H | 1.2339096  | 3.2750461  | 0.5383114  |
| H | 0.1938498  | 2.6206447  | 1.4072267  |
| O | -1.5434873 | -3.2044804 | 0.5605741  |
| H | -2.3097334 | -3.5346908 | 1.0472249  |
| H | -1.9047163 | -2.5219340 | -0.0792789 |

35

G17C1W2 ST

|   |            |            |            |
|---|------------|------------|------------|
| N | 0.6945941  | -0.4294393 | -2.4327933 |
| C | -0.6189515 | -0.3709307 | -2.0929674 |
| N | -1.5973894 | -1.2284938 | -2.5438139 |
| C | -2.6961619 | -0.8339046 | -1.9130260 |
| H | -3.6694690 | -1.2894542 | -2.0321487 |
| N | -2.5060080 | 0.2313356  | -1.0895342 |
| H | -3.1409744 | 0.6422380  | -0.4004556 |
| C | -1.1642612 | 0.5433357  | -1.1824282 |
| C | -0.3577105 | 1.4474095  | -0.4502992 |
| O | -0.6881212 | 2.2396201  | 0.4611272  |
| N | 0.9764445  | 1.3395988  | -0.8508988 |
| H | 1.6730857  | 1.8126714  | -0.2636096 |
| C | 1.4479375  | 0.4434958  | -1.7944991 |
| N | 2.7791518  | 0.5338199  | -2.0822143 |
| H | 3.3861036  | 0.9199410  | -1.3624296 |
| H | 3.1407847  | -0.2644792 | -2.5856499 |
| N | 0.7598399  | -2.0946847 | 0.5556726  |
| C | -0.5816251 | -2.2270733 | 0.7181634  |
| H | -1.0798611 | -2.9495827 | 0.0833903  |
| C | -1.2322806 | -1.4454326 | 1.6193511  |
| H | -2.3022456 | -1.5198370 | 1.7581624  |
| C | -0.4392932 | -0.4837951 | 2.3245653  |
| N | -1.0333399 | 0.3559991  | 3.2137227  |
| H | -0.4499459 | 1.1329982  | 3.5008357  |
| H | -2.0056597 | 0.5931564  | 3.0394671  |
| N | 0.8788864  | -0.3651602 | 2.1672688  |
| C | 1.5220174  | -1.1456299 | 1.2651218  |
| O | 2.7332854  | -1.0559419 | 0.9933392  |
| H | 1.2456139  | -2.5919128 | -0.1812613 |
| O | -3.1340634 | 1.6311204  | 1.3466806  |
| H | -2.2360431 | 1.9859712  | 1.0670283  |
| H | -3.6953216 | 2.4096207  | 1.4647424  |
| O | 3.4806044  | 1.4759972  | 0.6066489  |
| H | 3.2821783  | 0.5622591  | 0.9571009  |
| H | 3.7556127  | 2.0039342  | 1.3668309  |

35

G17C2AW2 ST

|   |            |            |            |
|---|------------|------------|------------|
| N | -0.9509010 | -2.2351337 | -0.0200575 |
| C | 0.3148330  | -1.9268065 | 0.3803290  |
| N | 1.4551445  | -2.5813794 | -0.0230146 |
| C | 2.4427958  | -1.8953568 | 0.5431893  |
| H | 3.4927011  | -2.1262949 | 0.4299914  |

|   |            |            |            |
|---|------------|------------|------------|
| N | 2.0234425  | -0.8477528 | 1.2994252  |
| H | 2.5571831  | -0.0556585 | 1.6832417  |
| C | 0.6488994  | -0.8408499 | 1.1997693  |
| C | -0.3285475 | 0.0519279  | 1.7114583  |
| O | -0.1986439 | 1.0738413  | 2.4109462  |
| N | -1.6021882 | -0.3540327 | 1.2867228  |
| H | -2.3668807 | 0.2765547  | 1.5215404  |
| C | -1.8645991 | -1.4081392 | 0.4365109  |
| N | -3.1877400 | -1.5865846 | 0.1158958  |
| H | -3.7348255 | -0.7329102 | 0.0206117  |
| H | -3.3236726 | -2.2647378 | -0.6223740 |
| N | 1.1452434  | 2.1739956  | -0.7417170 |
| C | 2.0949057  | 1.3820060  | -1.2877808 |
| H | 3.1237072  | 1.6678833  | -1.0854849 |
| C | 1.8092176  | 0.2623853  | -2.0340643 |
| H | 2.5945945  | -0.3662910 | -2.4352081 |
| C | 0.4442730  | -0.0547239 | -2.2082385 |
| N | 0.0414310  | -1.1640514 | -2.8892545 |
| H | -0.9129204 | -1.4440372 | -2.6967561 |
| H | 0.6938284  | -1.9385084 | -2.8978587 |
| N | -0.5247466 | 0.7435118  | -1.7160458 |
| C | -0.1016190 | 1.7907824  | -1.0231158 |
| O | -1.1012599 | 2.5621697  | -0.5050129 |
| H | -0.6681727 | 3.2089290  | 0.0793574  |
| O | -3.7176223 | 1.3706270  | 0.1652589  |
| H | -2.9295152 | 1.8006536  | -0.2229877 |
| H | -4.3331634 | 2.0877275  | 0.3669556  |
| O | 2.4457354  | 1.8387798  | 2.1289344  |
| H | 2.2807793  | 2.3029147  | 1.2894955  |
| H | 1.5217799  | 1.6824332  | 2.4462925  |

35

G17C2BW2 ST

|   |            |            |            |
|---|------------|------------|------------|
| N | -1.3816383 | 1.8409342  | 0.1353998  |
| C | -2.1767585 | 0.7928143  | -0.2058525 |
| N | -3.3934526 | 0.5011153  | 0.3755803  |
| C | -3.7906234 | -0.6122633 | -0.2215550 |
| H | -4.7246989 | -1.1202722 | -0.0267670 |
| N | -2.9027479 | -1.0767933 | -1.1453455 |
| H | -2.9922998 | -1.8966342 | -1.7301338 |
| C | -1.8505960 | -0.1816256 | -1.1552547 |
| C | -0.5635084 | -0.2569860 | -1.7528633 |
| O | -0.0995603 | -1.1548058 | -2.4763954 |
| N | 0.1969981  | 0.8530821  | -1.3613236 |
| H | 1.1873923  | 0.8889219  | -1.6368929 |
| C | -0.2183528 | 1.8323938  | -0.4819163 |
| N | 0.6710433  | 2.8468323  | -0.2998115 |
| H | 1.6222264  | 2.7176826  | -0.6289390 |
| H | 0.5030660  | 3.4574116  | 0.4852068  |
| N | 1.8933377  | -1.4828458 | 0.6800357  |
| C | 0.6911665  | -2.0996926 | 0.7333436  |
| H | 0.5912296  | -2.9862197 | 0.1140915  |
| C | -0.3689506 | -1.6402290 | 1.4832005  |
| H | -1.3248275 | -2.1502787 | 1.4826830  |
| C | -0.1692530 | -0.4445270 | 2.2078475  |
| N | -1.1518045 | 0.1358053  | 2.9486635  |
| H | -0.9865316 | 1.1058058  | 3.1861651  |
| H | -2.1083070 | -0.0635227 | 2.6816421  |
| N | 1.0325008  | 0.1670294  | 2.1995943  |
| C | 1.9706273  | -0.3976912 | 1.4455122  |
| O | 3.1770995  | 0.2392255  | 1.4276123  |
| H | 3.0842114  | 0.9827320  | 2.0495983  |
| O | 2.7325556  | -1.3484992 | -2.1683588 |
| H | 2.6867892  | -1.5931827 | -1.2192062 |
| H | 1.7889277  | -1.3818651 | -2.4474774 |

|   |           |           |            |
|---|-----------|-----------|------------|
| O | 3.0942018 | 1.2504873 | -1.4114944 |
| H | 3.1139891 | 0.3704150 | -1.8779887 |
| H | 3.3707316 | 1.0008239 | -0.5111469 |

35

G91C1W2 ST

|   |            |            |            |
|---|------------|------------|------------|
| N | 0.6201243  | -0.3139621 | -2.1866593 |
| C | 1.1868514  | -0.0655923 | -1.0011551 |
| N | 1.9862850  | -0.8997251 | -0.2548560 |
| H | 2.1051873  | -1.9268456 | -0.3869373 |
| C | 2.2721719  | -0.2332997 | 0.9037066  |
| H | 2.8611355  | -0.6897293 | 1.6853995  |
| N | 1.7551397  | 0.9789481  | 0.9564974  |
| C | 1.0550640  | 1.1059219  | -0.2399667 |
| C | 0.1947098  | 2.0897893  | -0.7648155 |
| O | -0.1339484 | 3.2258168  | -0.1355629 |
| H | 0.1897814  | 3.2055851  | 0.8049815  |
| N | -0.3803805 | 1.8864640  | -1.9465008 |
| C | -0.1398010 | 0.7182978  | -2.5873199 |
| N | -0.8370359 | 0.5457598  | -3.7669253 |
| H | -1.1526449 | 1.4023944  | -4.2015575 |
| H | -0.4537879 | -0.1499427 | -4.3927678 |
| N | -1.9571385 | -1.2848452 | -0.3643105 |
| C | -2.3612397 | -0.0413621 | -0.0009669 |
| H | -2.9611548 | 0.5082174  | -0.7159842 |
| C | -1.9815295 | 0.4663433  | 1.2010681  |
| H | -2.2733843 | 1.4623056  | 1.5050563  |
| C | -1.1187723 | -0.3530245 | 1.9953035  |
| N | -0.6838578 | 0.1034252  | 3.2010427  |
| H | 0.0508290  | -0.4503225 | 3.6228851  |
| H | -0.6069391 | 1.1074152  | 3.3287045  |
| N | -0.7142370 | -1.5695144 | 1.6296152  |
| C | -1.1090837 | -2.0789124 | 0.4351115  |
| O | -0.7572680 | -3.1815392 | -0.0169973 |
| H | -2.1475045 | -1.6441421 | -1.2920715 |
| O | 0.6390521  | 2.8360200  | 2.4921996  |
| H | 1.2515205  | 2.1292803  | 2.1069271  |
| H | 1.2078429  | 3.4880321  | 2.9251601  |
| O | 1.8810519  | -3.6433450 | -0.1594737 |
| H | 1.9599070  | -4.2118314 | -0.9382042 |
| H | 0.8992672  | -3.5910717 | 0.0114118  |

35

G91C2AW2 ST

|   |            |            |            |
|---|------------|------------|------------|
| N | -0.8017616 | -0.9758489 | 2.4729087  |
| C | -1.3432884 | -0.5279325 | 1.3419767  |
| N | -2.2923186 | -1.1570326 | 0.5664454  |
| H | -2.6718449 | -2.0792702 | 0.7285420  |
| C | -2.5444256 | -0.3378616 | -0.5087900 |
| H | -3.2356101 | -0.6173151 | -1.2904029 |
| N | -1.8475776 | 0.7748829  | -0.4803799 |
| C | -1.0783329 | 0.6810152  | 0.6775801  |
| C | -0.1214239 | 1.5110115  | 1.3028041  |
| O | 0.2807540  | 2.7044239  | 0.8658964  |
| H | 0.0801526  | 2.8747663  | -0.0976815 |
| N | 0.4484447  | 1.1006719  | 2.4352168  |
| C | 0.0967554  | -0.0958545 | 2.9530444  |
| N | 0.7838578  | -0.4739205 | 4.0820008  |
| H | 1.2279595  | 0.2762197  | 4.5925647  |
| H | 0.3578579  | -1.2061017 | 4.6325064  |
| N | 0.5482239  | -2.6815874 | -0.9166679 |
| C | 1.3780487  | -2.3234472 | 0.0866862  |
| H | 1.5047056  | -3.0516679 | 0.8829524  |
| C | 2.0221933  | -1.1077474 | 0.1382980  |
| H | 2.6579727  | -0.8414914 | 0.9740492  |

|   |            |            |            |
|---|------------|------------|------------|
| C | 1.7622992  | -0.1992245 | -0.9129193 |
| N | 2.3308185  | 1.0351343  | -0.9520812 |
| H | 1.8809318  | 1.7449261  | -1.5256293 |
| H | 2.7067034  | 1.3885031  | -0.0825737 |
| N | 0.9415947  | -0.5356253 | -1.9327167 |
| C | 0.4025776  | -1.7504962 | -1.8611482 |
| O | -0.4247420 | -2.0615325 | -2.8902108 |
| H | -0.7133395 | -2.9743074 | -2.7137798 |
| O | 0.4063988  | 3.2691752  | -1.7363022 |
| H | 0.3445600  | 4.1811533  | -2.0500374 |
| H | -0.1414748 | 2.6939804  | -2.3669570 |
| O | -0.9359779 | 1.4742291  | -3.0489314 |
| H | -1.4391345 | 1.2947732  | -2.2142548 |
| H | -0.2590439 | 0.7617023  | -3.0200802 |

35

G91C2BW2 ST

|   |            |            |            |
|---|------------|------------|------------|
| N | 0.4597811  | 2.2355567  | -0.5488060 |
| C | 1.0954139  | 1.0874014  | -0.3071111 |
| N | 1.8741567  | 0.7689855  | 0.7832699  |
| H | 1.8900628  | 1.2941778  | 1.6760268  |
| C | 2.2690581  | -0.5323278 | 0.6145366  |
| H | 2.8707940  | -1.0416826 | 1.3527548  |
| N | 1.8359274  | -1.0719026 | -0.5066809 |
| C | 1.0831406  | -0.0662727 | -1.1057805 |
| C | 0.2678426  | -0.0065715 | -2.2540684 |
| O | 0.0652693  | -1.0291542 | -3.0983015 |
| H | 0.4576102  | -1.8669534 | -2.7271418 |
| N | -0.3853723 | 1.1166090  | -2.5317816 |
| C | -0.2556505 | 2.1654933  | -1.6847023 |
| N | -1.0059669 | 3.2725504  | -2.0051297 |
| H | -1.3103079 | 3.3305933  | -2.9663879 |
| H | -0.7228639 | 4.1367942  | -1.5649718 |
| N | -1.0680659 | 0.4982306  | 2.3683225  |
| C | -1.8528292 | 0.8653440  | 1.3278491  |
| H | -2.1833076 | 1.8990706  | 1.3284241  |
| C | -2.1910200 | 0.0193953  | 0.2957148  |
| H | -2.7860497 | 0.3650892  | -0.5405307 |
| C | -1.6422313 | -1.2824349 | 0.3315725  |
| N | -1.8307817 | -2.1855851 | -0.6672968 |
| H | -1.1608080 | -2.9459413 | -0.7235867 |
| H | -2.1435970 | -1.8301829 | -1.5602693 |
| N | -0.8995515 | -1.6859011 | 1.3822469  |
| C | -0.6726337 | -0.7743601 | 2.3219554  |
| O | 0.0980715  | -1.1744158 | 3.3666427  |
| H | 0.3046957  | -2.1088993 | 3.1882814  |
| O | 1.2195987  | 1.9122834  | 3.2695983  |
| H | 1.4994819  | 1.4349269  | 4.0638820  |
| H | 0.3072301  | 1.5593102  | 3.0958832  |
| O | 0.9321661  | -3.2554579 | -1.7637660 |
| H | 1.5820044  | -3.8601535 | -2.1483521 |
| H | 1.4474818  | -2.6261735 | -1.1710309 |

35

G92C1W2 ST

|   |            |            |            |
|---|------------|------------|------------|
| N | -0.9035077 | -1.2954765 | 0.8107671  |
| C | -1.2256327 | -0.0015788 | 0.6676617  |
| N | -1.9593112 | 0.5737554  | -0.3314780 |
| H | -2.1961934 | 0.1076959  | -1.2216098 |
| C | -1.9530148 | 1.9319510  | -0.0751296 |
| H | -2.4328784 | 2.6245479  | -0.7512653 |
| N | -1.3104226 | 2.2696996  | 1.0197322  |
| C | -0.8386241 | 1.0587708  | 1.5079335  |
| C | -0.0404515 | 0.6786987  | 2.5922531  |
| O | 0.4117151  | 1.5805120  | 3.4859080  |

|   |            |            |            |
|---|------------|------------|------------|
| H | 0.9315199  | 1.0706220  | 4.1345123  |
| N | 0.3157434  | -0.5939387 | 2.7687002  |
| C | -0.1112166 | -1.5098970 | 1.8720360  |
| N | 0.3803915  | -2.7897086 | 2.0327670  |
| H | 0.6985225  | -3.0099918 | 2.9669348  |
| H | -0.1482746 | -3.5199644 | 1.5717162  |
| N | 1.4053567  | 2.0015301  | -1.2554644 |
| C | 2.2539875  | 1.4661845  | -0.3427933 |
| H | 2.7712976  | 2.1601177  | 0.3100926  |
| C | 2.4110198  | 0.1194833  | -0.2663140 |
| H | 3.0772755  | -0.3217997 | 0.4628758  |
| C | 1.6058240  | -0.6823612 | -1.1410904 |
| N | 1.6830721  | -2.0306631 | -1.0847151 |
| H | 0.8714355  | -2.5603684 | -1.4315597 |
| H | 2.1192579  | -2.4287012 | -0.2634148 |
| N | 0.7569574  | -0.1443109 | -2.0242645 |
| C | 0.6230522  | 1.2147124  | -2.1338256 |
| O | -0.1505986 | 1.7739236  | -2.9095861 |
| H | 1.2284924  | 2.9979174  | -1.2874062 |
| O | -0.9205363 | -3.2806107 | -1.2448364 |
| H | -1.4436362 | -2.9343742 | -1.9890956 |
| H | -1.0727386 | -2.6075070 | -0.5353753 |
| O | -1.8066748 | -0.9213664 | -2.7716259 |
| H | -0.8308923 | -0.7430350 | -2.6376555 |
| H | -2.0176428 | -0.4168390 | -3.5710192 |

35

G92C2AW2 ST

|   |            |            |            |
|---|------------|------------|------------|
| N | 0.7977305  | 2.0417016  | -1.5604952 |
| C | 0.1242051  | 2.0693239  | -0.4097161 |
| N | 0.3220936  | 2.9123994  | 0.6601619  |
| H | 1.0371761  | 3.6224248  | 0.7323177  |
| C | -0.5854552 | 2.5532487  | 1.6338955  |
| H | -0.6265534 | 3.0604065  | 2.5867083  |
| N | -1.3589630 | 1.5586573  | 1.2703958  |
| C | -0.9298820 | 1.2348323  | -0.0136287 |
| C | -1.3059118 | 0.2421364  | -0.9419836 |
| O | -2.2419029 | -0.6742433 | -0.7459464 |
| H | -2.4744935 | -0.7479817 | 0.2509367  |
| N | -0.6622805 | 0.1897337  | -2.1146646 |
| C | 0.3374794  | 1.0718707  | -2.3689878 |
| N | 0.9249361  | 0.9631210  | -3.6014266 |
| H | 0.8102398  | 0.0863000  | -4.0913087 |
| H | 1.8101935  | 1.4358792  | -3.7120294 |
| N | 1.9812730  | -0.0268914 | 1.8086396  |
| C | 2.3591390  | -0.3586382 | 0.5541827  |
| H | 3.1928077  | 0.2058994  | 0.1455827  |
| C | 1.7416072  | -1.3357702 | -0.1927404 |
| H | 2.0600818  | -1.5756754 | -1.1997991 |
| C | 0.6392035  | -1.9940749 | 0.4016151  |
| N | -0.0416105 | -2.9719773 | -0.2425998 |
| H | -0.9221653 | -3.2424779 | 0.1762590  |
| H | -0.0135439 | -2.9721858 | -1.2668720 |
| N | 0.2304801  | -1.6682508 | 1.6497380  |
| C | 0.9412435  | -0.7242585 | 2.2658419  |
| O | 0.5191578  | -0.4327565 | 3.5198010  |
| H | 1.1217711  | 0.2637879  | 3.8339749  |
| O | -2.5601087 | -0.9189613 | 1.8307938  |
| H | -1.7036010 | -1.3778969 | 2.0022481  |
| H | -2.3295877 | 0.0233948  | 2.0069745  |
| O | -0.1656816 | -2.3301492 | -3.1243576 |
| H | -0.5085720 | -1.4386186 | -2.8304389 |
| H | -0.9067208 | -2.7389017 | -3.5931075 |

35

## G92C2BW2 ST

|   |            |            |            |
|---|------------|------------|------------|
| N | 1.5510577  | -0.5324411 | -0.0575626 |
| C | 0.7283917  | -1.5795493 | -0.1836868 |
| N | 0.4507767  | -2.5690939 | 0.7243016  |
| H | 0.6534687  | -2.5316189 | 1.7413802  |
| C | -0.5080897 | -3.3723870 | 0.1396810  |
| H | -0.9166364 | -4.2215615 | 0.6693099  |
| N | -0.8504406 | -3.0071237 | -1.0775798 |
| C | -0.0807411 | -1.8744885 | -1.2936658 |
| C | -0.0507962 | -0.9398933 | -2.3269379 |
| O | -0.8286886 | -1.0321957 | -3.4302264 |
| H | -1.3495116 | -1.8508591 | -3.3444090 |
| N | 0.7296630  | 0.1313949  | -2.2438187 |
| C | 1.4993352  | 0.2739010  | -1.1264138 |
| N | 2.2578393  | 1.4142435  | -1.0869414 |
| H | 2.4381478  | 1.8791560  | -1.9643317 |
| H | 2.9811983  | 1.4462107  | -0.3840768 |
| N | -0.8961760 | 0.1489194  | 2.2951096  |
| C | -1.5951938 | 0.1273315  | 1.1365889  |
| H | -2.1902744 | -0.7647020 | 0.9617923  |
| C | -1.5556963 | 1.1395342  | 0.2066128  |
| H | -2.1108785 | 1.0812341  | -0.7210992 |
| C | -0.7276546 | 2.2501055  | 0.5008786  |
| N | -0.6024323 | 3.3010472  | -0.3434653 |
| H | 0.1471732  | 3.9412361  | -0.1163205 |
| H | -0.7587736 | 3.1400611  | -1.3436213 |
| N | -0.0421172 | 2.3023535  | 1.6634539  |
| C | -0.1680227 | 1.2527861  | 2.4683768  |
| O | 0.5476534  | 1.2861573  | 3.6200454  |
| H | 1.0318698  | 2.1299317  | 3.5997648  |
| O | 0.2787418  | -2.1132263 | 3.4418529  |
| H | 0.9723833  | -1.7616617 | 4.0176351  |
| H | -0.2491059 | -1.3071803 | 3.1801239  |
| O | -0.4035382 | 2.5342114  | -3.1297732 |
| H | -1.0454030 | 2.3697934  | -3.8338197 |
| H | 0.0295545  | 1.6538536  | -2.9683557 |

35

## G19C1W2 TS

|   |            |            |            |
|---|------------|------------|------------|
| N | 1.1924460  | 3.9351870  | -1.3392142 |
| C | 2.3700603  | 3.5555470  | -0.7225706 |
| H | 3.3173754  | 4.0028812  | -0.9863896 |
| N | 2.1911158  | 2.6230779  | 0.1805930  |
| C | 0.8265267  | 2.3761782  | 0.1633680  |
| C | 0.0330458  | 1.4478323  | 0.9013212  |
| O | 0.3696509  | 0.6131305  | 1.7632728  |
| N | -1.3156618 | 1.5285755  | 0.5241104  |
| H | -1.9710198 | 0.8562061  | 0.9663022  |
| C | -1.8347837 | 2.3446880  | -0.4476596 |
| N | -3.1760087 | 2.2404664  | -0.6512882 |
| H | -3.6387354 | 1.4006900  | -0.3112483 |
| H | -3.5300208 | 2.6722819  | -1.4920995 |
| N | -1.1154365 | 3.2145744  | -1.1409821 |
| C | 0.1854223  | 3.1804350  | -0.7873289 |
| H | 1.0807808  | 4.6262609  | -2.0685738 |
| N | 0.1444078  | -1.9695460 | 0.5547764  |
| C | 1.4377145  | -2.2337804 | 0.2388047  |
| H | 2.1780640  | -1.5114945 | 0.5810567  |
| C | 1.7449610  | -3.3545118 | -0.4724514 |
| H | 2.7698141  | -3.5803290 | -0.7386696 |
| C | 0.6509548  | -4.1972648 | -0.8316094 |
| N | 0.8699818  | -5.3310917 | -1.5565854 |
| H | 0.0905532  | -5.9668943 | -1.6546511 |
| H | 1.8013899  | -5.7099339 | -1.6302813 |
| N | -0.6164004 | -3.9313212 | -0.5274315 |

|   |            |            |           |
|---|------------|------------|-----------|
| C | -0.9185047 | -2.8002946 | 0.1602071 |
| O | -2.0891368 | -2.4873016 | 0.4535133 |
| H | -0.0532029 | -1.1240018 | 1.1037228 |
| O | 3.2241797  | 0.1723459  | 1.6080793 |
| H | 3.2904103  | 0.9871078  | 1.0747037 |
| H | 2.3357154  | 0.2934881  | 1.9969028 |
| O | -3.3432238 | -0.2684293 | 1.0204772 |
| H | -3.8246307 | -0.4393199 | 1.8409730 |
| H | -2.8638210 | -1.1310871 | 0.8056444 |

35

G19C2AW2 TS

|   |            |            |            |
|---|------------|------------|------------|
| N | -0.4928603 | 1.7723142  | -3.0420977 |
| C | 0.6018979  | 1.0975607  | -3.5361661 |
| H | 1.2535375  | 1.5305942  | -4.2807065 |
| N | 0.7510687  | -0.0861259 | -2.9872600 |
| C | -0.2966356 | -0.1957317 | -2.0855747 |
| C | -0.6466770 | -1.2533009 | -1.1855771 |
| O | -0.1299271 | -2.3593840 | -1.0231094 |
| N | -1.7563973 | -0.8643610 | -0.3897655 |
| H | -1.9665374 | -1.4782412 | 0.4000749  |
| C | -2.4444505 | 0.3191525  | -0.4749583 |
| N | -3.5074940 | 0.4701287  | 0.3621642  |
| H | -3.5496086 | -0.1192221 | 1.1910358  |
| H | -3.8649004 | 1.4116248  | 0.4363754  |
| N | -2.1529245 | 1.2758019  | -1.3441797 |
| C | -1.0776467 | 0.9619982  | -2.0951813 |
| H | -0.8058009 | 2.6976168  | -3.3024168 |
| N | 1.1421972  | 1.5400938  | 3.1139087  |
| C | 2.2780615  | 1.6866540  | 2.3904880  |
| H | 2.8503238  | 2.5897534  | 2.5869479  |
| C | 2.7073509  | 0.7705262  | 1.4576278  |
| H | 3.6197249  | 0.9199310  | 0.8923575  |
| C | 1.9020336  | -0.3815367 | 1.2604120  |
| N | 2.2308505  | -1.3677380 | 0.4024134  |
| H | 1.4744598  | -2.0110547 | 0.1744775  |
| H | 2.8622039  | -1.1674898 | -0.3773603 |
| N | 0.7556634  | -0.5424767 | 1.9692608  |
| C | 0.4802315  | 0.4224121  | 2.8275698  |
| O | -0.6907885 | 0.2356692  | 3.5260301  |
| H | -0.7747402 | 1.0121782  | 4.1063572  |
| O | -2.6837327 | -1.4333996 | 2.4052394  |
| H | -1.9369994 | -0.9681729 | 2.8410762  |
| H | -2.6829329 | -2.3286966 | 2.7688018  |
| O | 3.3672065  | -0.9141745 | -2.2843915 |
| H | 2.4553539  | -0.7247274 | -2.6264075 |
| H | 3.5913645  | -1.7755502 | -2.6634415 |

35

G19C2BW2 TS

|   |            |            |            |
|---|------------|------------|------------|
| N | -3.3707051 | -1.2729130 | 1.2408443  |
| C | -3.9068679 | -0.0629181 | 0.8473348  |
| H | -4.8181288 | 0.3222995  | 1.2806626  |
| N | -3.1875176 | 0.5320743  | -0.0740541 |
| C | -2.1245019 | -0.3287319 | -0.2982969 |
| C | -1.0187087 | -0.2223195 | -1.1995895 |
| O | -0.7442974 | 0.6492432  | -2.0292383 |
| N | -0.1558499 | -1.3383545 | -1.0463865 |
| H | 0.7021496  | -1.2950849 | -1.5963997 |
| C | -0.3193726 | -2.3790590 | -0.1679370 |
| N | 0.6343571  | -3.3597218 | -0.1825652 |
| H | 1.5959381  | -3.0841349 | -0.3631309 |
| H | 0.5356356  | -4.0112305 | 0.5854100  |
| N | -1.3643452 | -2.4987115 | 0.6330883  |
| C | -2.2157936 | -1.4575807 | 0.5178092  |



|   |            |            |            |
|---|------------|------------|------------|
| H | -3.7430839 | -1.9074199 | 1.9342993  |
| N | 2.8555707  | -0.5304456 | -1.0612799 |
| C | 2.4500758  | 0.7127000  | -1.4278135 |
| H | 2.4062131  | 0.8955147  | -2.4975296 |
| C | 2.0673265  | 1.6866939  | -0.5381910 |
| H | 1.7076862  | 2.6525696  | -0.8688989 |
| C | 2.0909533  | 1.3478823  | 0.8362882  |
| N | 1.6792855  | 2.2098456  | 1.7897509  |
| H | 1.5967037  | 1.8407028  | 2.7268583  |
| H | 1.0621306  | 2.9861775  | 1.5158088  |
| N | 2.5434435  | 0.1339816  | 1.2321712  |
| C | 2.8941307  | -0.6996499 | 0.2579240  |
| O | 3.3149224  | -1.9367365 | 0.6618662  |
| H | 3.2775507  | -1.9103354 | 1.6343460  |
| O | -1.9049615 | 3.0056447  | -1.0044966 |
| H | -2.6060730 | 2.4482678  | -0.6070647 |
| H | -1.4357328 | 2.3396012  | -1.5561512 |
| O | -0.2395949 | 4.0708305  | 0.8511688  |
| H | -0.8618805 | 3.6713411  | 0.1789781  |
| H | -0.1132910 | 4.9842288  | 0.5635476  |

35

G17C1W2 TS

|   |            |            |            |
|---|------------|------------|------------|
| N | 1.2023078  | -1.5195007 | 1.1604204  |
| C | 1.5352252  | -0.3174792 | 1.7126153  |
| N | 1.3713384  | 0.0092710  | 3.0388982  |
| C | 1.7457184  | 1.2773917  | 3.1140462  |
| H | 1.7581964  | 1.8673681  | 4.0196091  |
| N | 2.1356330  | 1.7976819  | 1.9158274  |
| H | 2.4576463  | 2.7365584  | 1.7261074  |
| C | 2.0143010  | 0.7783584  | 0.9929021  |
| C | 2.1692431  | 0.7523297  | -0.4201205 |
| O | 2.4638401  | 1.6764798  | -1.1925772 |
| N | 1.9116194  | -0.5453708 | -0.8917734 |
| H | 1.9409667  | -0.6961747 | -1.9091573 |
| C | 1.3921655  | -1.5726294 | -0.1459887 |
| N | 1.0984540  | -2.7067593 | -0.8430207 |
| H | 0.9273667  | -2.5896202 | -1.8411094 |
| H | 0.5139330  | -3.3681231 | -0.3518831 |
| N | -3.6212032 | 1.0541945  | -0.5141136 |
| C | -4.2763231 | 0.4967728  | 0.5357467  |
| H | -5.2970564 | 0.8200252  | 0.7069058  |
| C | -3.6441145 | -0.4176858 | 1.3140687  |
| H | -4.1478600 | -0.8755893 | 2.1558146  |
| C | -2.2876794 | -0.7450092 | 0.9622374  |
| N | -1.6203931 | -1.6695235 | 1.6840664  |
| H | -0.5976864 | -1.7539923 | 1.5594063  |
| H | -2.0050857 | -1.9634188 | 2.5696739  |
| N | -1.6494721 | -0.1925510 | -0.0758158 |
| C | -2.2846037 | 0.7213601  | -0.8514379 |
| O | -1.8016092 | 1.3020690  | -1.8330186 |
| H | -4.0646492 | 1.7373712  | -1.1152091 |
| O | 0.4947288  | 1.1661982  | -3.3052480 |
| H | 1.2029317  | 1.5252498  | -2.7305854 |
| H | -0.3227319 | 1.2117274  | -2.7476810 |
| O | 1.1685255  | -1.3677486 | -3.5113323 |
| H | 0.8324273  | -0.4137989 | -3.5522336 |
| H | 1.7076550  | -1.4926266 | -4.3032026 |

35

G17C2AW2 TS

|   |            |            |            |
|---|------------|------------|------------|
| N | -0.3314671 | -1.9936203 | -0.8552800 |
| C | -0.9054641 | -1.0971777 | -1.7091131 |
| N | -2.2154043 | -1.1225134 | -2.1158468 |
| C | -2.3350101 | -0.0496041 | -2.8932318 |

|   |            |            |            |
|---|------------|------------|------------|
| H | -3.2448448 | 0.2422651  | -3.3982347 |
| N | -1.1913416 | 0.6713851  | -3.0128732 |
| H | -0.9944453 | 1.5439568  | -3.5250065 |
| C | -0.2495861 | 0.0123255  | -2.2505362 |
| C | 1.0896337  | 0.3375590  | -1.9124107 |
| O | 1.7817528  | 1.3176789  | -2.2472520 |
| N | 1.6191632  | -0.6444287 | -1.0591543 |
| H | 2.5437852  | -0.4518167 | -0.6690099 |
| C | 0.9267033  | -1.7274520 | -0.5636738 |
| N | 1.6321276  | -2.5762926 | 0.2403682  |
| H | 2.4087015  | -2.1710406 | 0.7598533  |
| H | 1.0464518  | -3.2164980 | 0.7596568  |
| N | -0.2886245 | 1.7143722  | 3.5901195  |
| C | -1.6217776 | 1.5064398  | 3.6605683  |
| H | -2.1780021 | 2.1995655  | 4.2861042  |
| C | -2.2641410 | 0.4906444  | 2.9885219  |
| H | -3.3370376 | 0.3555305  | 3.0649817  |
| C | -1.4652854 | -0.3641933 | 2.1891522  |
| N | -1.9805883 | -1.4153182 | 1.5098056  |
| H | -1.4198344 | -1.8171384 | 0.7475037  |
| H | -2.9814765 | -1.4483329 | 1.3801276  |
| N | -0.1270273 | -0.1732713 | 2.1041548  |
| C | 0.3430578  | 0.8436119  | 2.8072616  |
| O | 1.6998833  | 1.0310456  | 2.7128037  |
| H | 1.8843615  | 1.8156124  | 3.2585598  |
| O | 3.5106130  | -0.5264762 | 1.1704737  |
| H | 2.9161758  | 0.0361174  | 1.7123443  |
| H | 4.4117334  | -0.2623880 | 1.3964687  |
| O | 0.2326102  | 2.9175510  | -3.8395145 |
| H | 0.9161890  | 2.4659460  | -3.2748715 |
| H | 0.6522114  | 3.0232537  | -4.7033696 |

35

G17C2BW2 TS

|   |            |            |            |
|---|------------|------------|------------|
| N | -0.6186627 | -1.7261690 | 1.8533051  |
| C | -0.2562932 | -0.6503425 | 2.5976669  |
| N | 0.5355899  | -0.6960500 | 3.7274444  |
| C | 0.6889433  | 0.5724830  | 4.0771963  |
| H | 1.2450775  | 0.9132075  | 4.9393575  |
| N | 0.0594116  | 1.4462949  | 3.2414093  |
| H | 0.0527251  | 2.4555509  | 3.2934233  |
| C | -0.5689204 | 0.6779043  | 2.2823662  |
| C | -1.2077273 | 1.0283183  | 1.0703898  |
| O | -1.3631632 | 2.1634902  | 0.5722197  |
| N | -1.6301287 | -0.1236452 | 0.3989352  |
| H | -2.0827530 | -0.0024647 | -0.5183590 |
| C | -1.3104185 | -1.4142862 | 0.7757821  |
| N | -1.7907085 | -2.3945756 | -0.0399395 |
| H | -2.0718178 | -2.1354220 | -0.9846017 |
| H | -1.4036403 | -3.3134222 | 0.1165953  |
| N | 1.1067034  | 0.3423002  | -2.9319206 |
| C | 2.0754728  | -0.5920655 | -2.8673215 |
| H | 2.3364269  | -1.0658390 | -3.8101430 |
| C | 2.6993810  | -0.9637012 | -1.6965609 |
| H | 3.4696856  | -1.7261983 | -1.6826315 |
| C | 2.2627652  | -0.3141434 | -0.5195768 |
| N | 2.7912264  | -0.5963645 | 0.7055734  |
| H | 2.2597694  | -0.2864599 | 1.5091980  |
| H | 3.2778159  | -1.4733198 | 0.8229256  |
| N | 1.3227600  | 0.6446448  | -0.5622530 |
| C | 0.7948544  | 0.9198979  | -1.7584648 |
| O | -0.1690935 | 1.8418896  | -1.8243308 |
| H | -0.4915543 | 2.0453419  | -0.8969269 |
| O | -2.6306319 | -0.6611555 | -2.2371482 |
| H | -3.5621347 | -0.6229259 | -2.4904358 |

|   |            |            |            |
|---|------------|------------|------------|
| H | -2.1190914 | -0.3397800 | -3.0388973 |
| O | -1.2243622 | 0.1880770  | -4.3712293 |
| H | -1.4790908 | 1.1054770  | -4.5484201 |
| H | -0.3046812 | 0.2749219  | -3.9786681 |

35

G91C1W2 TS

|   |            |            |            |
|---|------------|------------|------------|
| N | -0.9973179 | 0.5448330  | -1.9967624 |
| C | -0.2767423 | -0.5489950 | -1.7272943 |
| N | -0.7108200 | -1.7972062 | -1.3669777 |
| H | -1.6946041 | -2.0782012 | -1.1719072 |
| C | 0.4097184  | -2.5441052 | -1.1272431 |
| H | 0.3395450  | -3.5709138 | -0.8026157 |
| N | 1.5464686  | -1.8935860 | -1.3230167 |
| C | 1.1200473  | -0.6293505 | -1.7184617 |
| C | 1.8011974  | 0.5588055  | -2.0169563 |
| O | 3.1543511  | 0.6409169  | -2.0303029 |
| H | 3.4946492  | -0.2516041 | -1.8426968 |
| N | 1.1338445  | 1.6689355  | -2.2889564 |
| C | -0.2210343 | 1.6119902  | -2.2607974 |
| N | -0.8641214 | 2.7801537  | -2.5776460 |
| H | -0.3060799 | 3.6196596  | -2.5089475 |
| H | -1.8324756 | 2.8493194  | -2.2987098 |
| N | -0.4897000 | 1.0400422  | 3.7149497  |
| C | 0.6824845  | 0.7175030  | 4.3138051  |
| H | 0.8376259  | 1.0810031  | 5.3231642  |
| C | 1.5951203  | -0.0330273 | 3.6448139  |
| H | 2.5370603  | -0.3049742 | 4.1041957  |
| C | 1.2452960  | -0.4377910 | 2.3098582  |
| N | 2.1148864  | -1.1922305 | 1.6060672  |
| H | 1.9185693  | -1.4594438 | 0.6403072  |
| H | 3.0165812  | -1.4246093 | 1.9924395  |
| N | 0.0911271  | -0.1130608 | 1.7221782  |
| C | -0.8212397 | 0.6325611  | 2.3964290  |
| O | -1.9211694 | 0.9985559  | 1.9664886  |
| H | -1.1903502 | 1.5999291  | 4.1837237  |
| O | -3.3233086 | -2.2547176 | -0.6149755 |
| H | -3.4355183 | -1.2676517 | -0.4322077 |
| H | -4.0303469 | -2.4806591 | -1.2344508 |
| O | -3.2981390 | 0.3726921  | -0.3300232 |
| H | -2.8219228 | 0.5900223  | 0.5086586  |
| H | -2.6109087 | 0.5383436  | -1.0171901 |

35

G91C2AW2 TS

|   |            |            |            |
|---|------------|------------|------------|
| N | 1.1583851  | -2.4328783 | 0.3864614  |
| C | 1.9930888  | -1.4024239 | 0.2485496  |
| N | 3.1552674  | -1.1635943 | 0.9491653  |
| H | 3.5605071  | -1.7674589 | 1.6508860  |
| C | 3.6438528  | 0.0540832  | 0.5170055  |
| H | 4.5477532  | 0.4788440  | 0.9298134  |
| N | 2.8982328  | 0.6143480  | -0.4058994 |
| C | 1.8611703  | -0.2909749 | -0.6023854 |
| C | 0.7209105  | -0.3216905 | -1.4166074 |
| O | 0.4447678  | 0.6671729  | -2.2883994 |
| H | -0.4688097 | 0.5026661  | -2.5985927 |
| N | -0.1351945 | -1.3323394 | -1.3359468 |
| C | 0.1006864  | -2.3188890 | -0.4376712 |
| N | -0.8360951 | -3.3176381 | -0.4017038 |
| H | -1.7511156 | -3.0666717 | -0.7514943 |
| H | -0.8130770 | -3.9102519 | 0.4159024  |
| N | -3.1602743 | -0.6150788 | 0.0764739  |
| C | -2.9233107 | -0.9278576 | 1.3702950  |
| H | -3.5101292 | -1.7495107 | 1.7738509  |
| C | -1.9952627 | -0.2808000 | 2.1518469  |

|   |            |            |            |
|---|------------|------------|------------|
| H | -1.8181732 | -0.5788979 | 3.1790659  |
| C | -1.2668367 | 0.7798269  | 1.5528219  |
| N | -0.3096482 | 1.4623262  | 2.2078425  |
| H | 0.3536129  | 2.0867744  | 1.7109345  |
| H | -0.0583644 | 1.1612816  | 3.1369012  |
| N | -1.5307893 | 1.1425395  | 0.2741065  |
| C | -2.4331477 | 0.4084377  | -0.3682232 |
| O | -2.6134180 | 0.7579350  | -1.6708809 |
| H | -3.2842559 | 0.1384570  | -2.0085991 |
| O | -0.2873521 | 3.4016601  | -1.0663129 |
| H | -0.8011523 | 2.6780387  | -0.6293384 |
| H | 0.1565021  | 2.9324341  | -1.7902633 |
| O | 1.6361856  | 3.0446269  | 0.8774960  |
| H | 2.2045273  | 2.4166494  | 0.3887827  |
| H | 1.0268087  | 3.3841617  | 0.1747990  |

35

G91C2BW2 TS

|   |            |            |            |
|---|------------|------------|------------|
| N | 0.9822374  | 0.3386478  | 1.6203409  |
| C | 1.2409688  | 0.9498223  | 0.4550055  |
| N | 2.2675643  | 0.6838479  | -0.4162173 |
| H | 2.9315141  | -0.1050752 | -0.3382741 |
| C | 2.0828136  | 1.5020653  | -1.5020183 |
| H | 2.7546392  | 1.4828839  | -2.3472875 |
| N | 1.0307369  | 2.2855970  | -1.3879326 |
| C | 0.4756489  | 1.9480825  | -0.1558411 |
| C | -0.7172477 | 2.3052960  | 0.5133810  |
| O | -1.6165378 | 3.1722371  | 0.0541214  |
| H | -1.3289633 | 3.5655412  | -0.8279880 |
| N | -1.0093191 | 1.7184367  | 1.6736420  |
| C | -0.1647070 | 0.7920241  | 2.1707788  |
| N | -0.5122774 | 0.2671915  | 3.3859680  |
| H | -1.4791501 | 0.3895012  | 3.6513843  |
| H | -0.0799040 | -0.6091177 | 3.6423950  |
| N | 0.1198964  | -3.5622266 | -0.6952156 |
| C | -0.9754711 | -3.7175091 | -1.4634162 |
| H | -0.9654154 | -4.5787740 | -2.1277703 |
| C | -2.0627071 | -2.8629708 | -1.4493973 |
| H | -2.9201483 | -3.0269708 | -2.0926372 |
| C | -1.9896738 | -1.7739782 | -0.5561326 |
| N | -2.9932642 | -0.8615068 | -0.4025684 |
| H | -2.7686857 | -0.0221977 | 0.1176439  |
| H | -3.6986958 | -0.7805308 | -1.1189833 |
| N | -0.9150700 | -1.6026399 | 0.2303622  |
| C | 0.0673810  | -2.4965056 | 0.1038066  |
| O | 1.1635435  | -2.2917805 | 0.8747542  |
| H | 1.0744968  | -1.3836033 | 1.3089993  |
| O | 3.6146892  | -1.7679981 | -0.4299391 |
| H | 4.3649566  | -2.0626936 | 0.1046211  |
| H | 2.8355118  | -2.2367487 | -0.0558159 |
| O | -0.7496432 | 4.1004231  | -2.3049721 |
| H | -0.4085176 | 5.0059467  | -2.2821024 |
| H | 0.0526291  | 3.5079825  | -2.2193115 |

35

G92C1W2 TS

|   |            |           |            |
|---|------------|-----------|------------|
| N | 0.5135887  | 2.1804710 | 0.6526734  |
| C | 0.0001302  | 1.7435056 | -0.5051379 |
| N | 0.6464918  | 1.5712372 | -1.6988529 |
| H | 1.6669187  | 1.6935383 | -1.8780933 |
| C | -0.2740395 | 1.0308910 | -2.5584203 |
| H | -0.0038075 | 0.7610616 | -3.5694243 |
| N | -1.4727096 | 0.8660979 | -2.0329108 |
| C | -1.3202952 | 1.3207308 | -0.7294339 |
| C | -2.1484150 | 1.3662582 | 0.3952466  |

|   |            |            |            |
|---|------------|------------|------------|
| O | -3.4350443 | 0.9578391  | 0.3392840  |
| H | -3.7869024 | 1.0853147  | 1.2396463  |
| N | -1.6899786 | 1.8012516  | 1.5653931  |
| C | -0.3922038 | 2.1824400  | 1.6447342  |
| N | 0.0212936  | 2.6507545  | 2.8670734  |
| H | -0.5505342 | 2.3843037  | 3.6556369  |
| H | 1.0200792  | 2.6668526  | 3.0205876  |
| N | 1.0652491  | -3.4366095 | 1.0879920  |
| C | 0.0139370  | -4.2456718 | 0.8035543  |
| H | 0.0124904  | -5.2301862 | 1.2577140  |
| C | -0.9724528 | -3.8029350 | -0.0167251 |
| H | -1.8184209 | -4.4334991 | -0.2591838 |
| C | -0.8279545 | -2.4731255 | -0.5487790 |
| N | -1.7675655 | -1.9987633 | -1.3896018 |
| H | -1.7347641 | -1.0258965 | -1.7166742 |
| H | -2.6070337 | -2.5310450 | -1.5551376 |
| N | 0.2094454  | -1.6796367 | -0.2618773 |
| C | 1.1912148  | -2.1228204 | 0.5639946  |
| O | 2.1940325  | -1.4854969 | 0.9095061  |
| H | 1.8182753  | -3.7356093 | 1.6947335  |
| O | 3.3932704  | 1.6449564  | -1.9214098 |
| H | 3.9120097  | 2.4556915  | -2.0151016 |
| H | 3.4544143  | 1.4022154  | -0.9450903 |
| O | 3.1524466  | 1.0976495  | 0.6667327  |
| H | 2.3195640  | 1.6128061  | 0.7827273  |
| H | 2.8423054  | 0.1625352  | 0.7367308  |

35

G92C2AW2 TS

|   |            |            |            |
|---|------------|------------|------------|
| N | -0.7319949 | 2.2304650  | 0.1353580  |
| C | 0.4372220  | 1.7710397  | -0.3353583 |
| N | 1.6719375  | 1.8662545  | 0.2479537  |
| H | 1.8857572  | 2.2750314  | 1.1796072  |
| C | 2.5345183  | 1.1753587  | -0.5655274 |
| H | 3.5805385  | 1.0740556  | -0.3134573 |
| N | 1.9672757  | 0.6623535  | -1.6380200 |
| C | 0.6357304  | 1.0354477  | -1.5136148 |
| C | -0.5309995 | 0.7538174  | -2.2306532 |
| O | -0.5023255 | 0.0063225  | -3.3522021 |
| H | -1.4288196 | -0.0550669 | -3.6502154 |
| N | -1.7134872 | 1.1974239  | -1.8138566 |
| C | -1.7649855 | 1.9100420  | -0.6646023 |
| N | -3.0028123 | 2.3764531  | -0.3027349 |
| H | -3.7924887 | 1.9088951  | -0.7240624 |
| H | -3.1093507 | 2.6679390  | 0.6588179  |
| N | -1.0867547 | -3.2191835 | 1.6053908  |
| C | -0.6664897 | -4.1728248 | 0.7477995  |
| H | -1.0905053 | -5.1633217 | 0.8934708  |
| C | 0.2401112  | -3.9349326 | -0.2608552 |
| H | 0.5561425  | -4.7253527 | -0.9326333 |
| C | 0.7398897  | -2.6137873 | -0.3805420 |
| N | 1.6515562  | -2.2771140 | -1.3209649 |
| H | 1.8688636  | -1.2904558 | -1.4927680 |
| H | 1.8453714  | -2.9316286 | -2.0627542 |
| N | 0.3362907  | -1.6409461 | 0.4693977  |
| C | -0.5387757 | -2.0213408 | 1.3879501  |
| O | -0.9550527 | -1.0386902 | 2.2436333  |
| H | -1.5780413 | -1.4879670 | 2.8425657  |
| O | 1.9830476  | 2.6652136  | 2.8895663  |
| H | 2.0250969  | 3.5814297  | 3.1962817  |
| H | 1.0440622  | 2.3698736  | 3.0647412  |
| O | -0.5766332 | 1.8229668  | 2.9053735  |
| H | -0.5745706 | 0.8506734  | 2.8202029  |
| H | -0.7493475 | 2.1117600  | 1.9712837  |

35

G92C2BW2 TS

|   |            |            |            |
|---|------------|------------|------------|
| N | 3.5757745  | 0.0633053  | 0.5792689  |
| C | 2.6559372  | -0.9012595 | 0.5494491  |
| N | 2.6328823  | -2.0576001 | 1.3048536  |
| H | 3.3250498  | -2.3334995 | 1.9877636  |
| C | 1.4759707  | -2.7274833 | 0.9902273  |
| H | 1.2068937  | -3.6602136 | 1.4640028  |
| N | 0.7593133  | -2.1030331 | 0.0788647  |
| C | 1.4917819  | -0.9562843 | -0.2249752 |
| C | 1.2741295  | 0.1443119  | -1.0885071 |
| O | 0.2764623  | 0.2714279  | -1.9425863 |
| H | -0.3623263 | -0.5243963 | -1.9289521 |
| N | 2.1387952  | 1.1649420  | -1.0394580 |
| C | 3.2235990  | 1.0765274  | -0.2337429 |
| N | 4.0339503  | 2.1843869  | -0.2227475 |
| H | 3.9610271  | 2.7915438  | -1.0262641 |
| H | 4.9551666  | 2.0566245  | 0.1712785  |
| N | -3.4539189 | 0.2166929  | 0.7923915  |
| C | -3.7169643 | 1.5141964  | 0.5270005  |
| H | -4.7679841 | 1.7680499  | 0.4167217  |
| C | -2.7421720 | 2.4743207  | 0.3670839  |
| H | -2.9952957 | 3.5012358  | 0.1293342  |
| C | -1.4013660 | 2.0373400  | 0.4680974  |
| N | -0.3431739 | 2.8693923  | 0.2605160  |
| H | 0.5430377  | 2.4285774  | 0.0250219  |
| H | -0.5282408 | 3.7344919  | -0.2269340 |
| N | -1.1167537 | 0.7659162  | 0.8042738  |
| C | -2.1513076 | -0.0603829 | 0.9369605  |
| O | -1.8817275 | -1.3496270 | 1.2214376  |
| H | -0.9269364 | -1.5032134 | 1.0391376  |
| O | -3.9767198 | -1.7827335 | -1.1566855 |
| H | -4.1745071 | -2.6275870 | -0.7274529 |
| H | -4.0034214 | -1.1273928 | -0.4143145 |
| O | -1.2732798 | -1.8347925 | -1.9549097 |
| H | -0.8168391 | -2.3041523 | -1.2281596 |
| H | -2.2290095 | -1.7957733 | -1.6968081 |
