# Supplementary material for: Microhydration of guanine⋯cytosine base pairs, a theoretical Study on the role of water in stability, structure and tautomeric equilibrium
Source: Royal Society of Chemistry journal article supplement (doi:10.1039/b819350a), 2009-01-01
Supplement: b819350a_mp2.pdf [file b819350a_mp2.pdf]

29

G19C1 HB

|   |            |            |            |
|---|------------|------------|------------|
| C | 1.3976002  | 0.0549365  | -0.9550754 |
| O | 0.7948440  | 0.0619255  | -2.0396535 |
| H | -0.3418659 | 0.1513155  | 0.1736674  |
| N | 0.6953091  | 0.1369980  | 0.2608918  |
| C | 1.2462394  | 0.1479677  | 1.5234437  |
| N | 0.3698628  | 0.3257246  | 2.5580764  |
| H | -0.6147533 | 0.0680179  | 2.4219913  |
| H | 0.7708002  | 0.0883820  | 3.4596339  |
| N | 2.5463338  | 0.0609433  | 1.7694401  |
| C | 3.2605875  | -0.0217654 | 0.6143655  |
| N | 4.6290127  | -0.1192751 | 0.5197364  |
| C | 2.8168475  | -0.0279512 | -0.7185836 |
| N | 3.8697888  | -0.1251140 | -1.6117381 |
| C | 4.9390147  | -0.1770151 | -0.8243608 |
| H | 5.9699984  | -0.2569826 | -1.1697740 |
| H | 5.2720373  | -0.1382821 | 1.3046048  |
| N | -2.1971491 | 0.0058823  | -0.0863734 |
| C | -2.7740696 | 0.0624115  | -1.2952881 |
| N | -1.9728286 | 0.1505380  | -2.3655058 |
| H | -0.9403273 | 0.1389248  | -2.2508051 |
| H | -2.3786047 | 0.1882195  | -3.2912921 |
| C | -2.9585538 | -0.1196772 | 1.0470806  |
| O | -2.4970598 | -0.1996356 | 2.1903114  |
| N | -4.3566750 | -0.1589005 | 0.8818017  |
| H | -4.8962034 | -0.2474432 | 1.7383546  |
| C | -4.9657463 | -0.0837983 | -0.3354886 |
| H | -6.0584422 | -0.1212005 | -0.3435690 |
| C | -4.2110704 | 0.0291863  | -1.4686679 |
| H | -4.6767284 | 0.0856412  | -2.4536924 |

29

G19C2A HB

|   |            |            |            |
|---|------------|------------|------------|
| C | 0.2489104  | 1.2646767  | -1.5110775 |
| N | 0.5087529  | 0.3849741  | -2.5391668 |
| H | 0.1133711  | -0.5509639 | -2.4456467 |
| H | 0.3457169  | 0.8137470  | -3.4461661 |
| N | 0.0995386  | 0.7044574  | -0.2635846 |
| H | 0.1020161  | -0.3300393 | -0.1823331 |
| C | -0.0811067 | 1.4027815  | 0.9493736  |
| O | -0.1903387 | 0.7940191  | 2.0212618  |
| C | -0.1075213 | 2.8258309  | 0.7121224  |
| N | -0.2639403 | 3.8757440  | 1.5988926  |
| C | -0.2044327 | 4.9505975  | 0.8191374  |
| H | -0.2900073 | 5.9814606  | 1.1634477  |
| N | -0.0197725 | 4.6465579  | -0.5142398 |
| H | 0.0617232  | 5.2949336  | -1.2908608 |
| C | 0.0471550  | 3.2768745  | -0.6085974 |
| N | 0.2262335  | 2.5635309  | -1.7560662 |
| C | -0.2382967 | -3.1009506 | -0.9226217 |
| O | -0.4655869 | -2.5031999 | -2.1253855 |
| H | -0.5920645 | -3.2473810 | -2.7397222 |
| N | -0.2687521 | -4.4327432 | -0.9105807 |
| C | -0.0442750 | -4.9691716 | 0.3154719  |
| H | -0.0590935 | -6.0637471 | 0.3698787  |
| C | 0.1881149  | -4.2093793 | 1.4505618  |
| H | 0.3599569  | -4.6767492 | 2.4232372  |
| C | 0.1914804  | -2.7941427 | 1.2995800  |
| N | 0.4370299  | -1.9520580 | 2.3265525  |
| H | 0.4257854  | -2.3345050 | 3.2641810  |
| H | 0.2125506  | -0.9496580 | 2.2137450  |
| N | -0.0188036 | -2.2416775 | 0.0781530  |

29

## G19C2B HB

|   |            |            |            |
|---|------------|------------|------------|
| N | -2.8692824 | 1.6707248  | 0.0163507  |
| C | -3.5221709 | 0.4723011  | -0.0444804 |
| N | -4.8830577 | 0.3078159  | -0.1566089 |
| H | -5.5644135 | 1.0586213  | -0.1992843 |
| C | -5.1248023 | -1.0497937 | -0.1880665 |
| H | -6.1360221 | -1.4485482 | -0.2722766 |
| N | -4.0168469 | -1.7802895 | -0.1061679 |
| C | -3.0106603 | -0.8353470 | -0.0154983 |
| C | -1.5754472 | -1.0078907 | 0.0902390  |
| O | -0.9031441 | -2.0377540 | 0.1218320  |
| N | -0.9495199 | 0.2636312  | 0.1597922  |
| H | 0.0865424  | 0.2381454  | 0.2044818  |
| C | -1.5654142 | 1.4872830  | 0.1263680  |
| N | -0.7358866 | 2.5820579  | 0.2939209  |
| H | 0.2210853  | 2.4699301  | -0.0383141 |
| H | -1.1788062 | 3.4383927  | -0.0282763 |
| N | 4.2364070  | 0.6505592  | -0.1564897 |
| C | 4.5957469  | -0.6452049 | -0.0562140 |
| N | 5.9446524  | -0.9072301 | -0.0593282 |
| H | 6.5123050  | -0.1561200 | -0.4416530 |
| H | 6.2232070  | -1.8379695 | -0.3519011 |
| C | 3.6309525  | -1.6677737 | 0.1024104  |
| H | 3.9158907  | -2.7195540 | 0.1801970  |
| C | 2.2994847  | -1.2740658 | 0.1566981  |
| H | 1.4745492  | -1.9888623 | 0.2639564  |
| N | 1.9236925  | 0.0247530  | 0.0730491  |
| C | 2.9232531  | 0.8935094  | -0.0813903 |
| O | 2.5358695  | 2.1888480  | -0.1852730 |
| H | 3.3625279  | 2.6917108  | -0.2797196 |

29

## G17C1 HB

|   |            |            |            |
|---|------------|------------|------------|
| H | 3.8119286  | 2.5389952  | -0.2275625 |
| N | 3.8526162  | 1.5268945  | -0.1718358 |
| C | 2.7775734  | 0.6837633  | -0.0454803 |
| C | 3.3088686  | -0.6169995 | -0.0097870 |
| N | 4.6851034  | -0.5752638 | -0.1124076 |
| C | 4.9658596  | 0.7228301  | -0.2067084 |
| H | 5.9677590  | 1.1420257  | -0.3026266 |
| N | 2.5575561  | -1.7563250 | 0.1104194  |
| C | 1.3706979  | 0.9406905  | 0.0274211  |
| O | 0.8040714  | 2.0525941  | -0.0054572 |
| N | 0.6805662  | -0.2595000 | 0.1458706  |
| H | -0.3586422 | -0.1840834 | 0.1610378  |
| C | 1.2632524  | -1.5193029 | 0.1920500  |
| N | 0.3847025  | -2.5537696 | 0.4109785  |
| H | 0.8027270  | -3.4531503 | 0.1908255  |
| H | -0.5795522 | -2.4355724 | 0.0822990  |
| C | -2.7761362 | 1.2857737  | 0.1072126  |
| N | -1.9775853 | 2.3534657  | 0.2669117  |
| H | -2.3857909 | 3.2791580  | 0.2672800  |
| H | -0.9487472 | 2.2482182  | 0.1878530  |
| N | -2.1959709 | 0.0832816  | 0.0085895  |
| C | -2.9526393 | -1.0497566 | -0.1654968 |
| O | -2.4862217 | -2.1856116 | -0.2826919 |
| N | -4.3510972 | -0.8834682 | -0.2128248 |
| H | -4.8883954 | -1.7368565 | -0.3393186 |
| C | -4.9628930 | 0.3288231  | -0.1004312 |
| H | -6.0551140 | 0.3365075  | -0.1502249 |
| C | -4.2121544 | 1.4587188  | 0.0633705  |
| H | -4.6809433 | 2.4397009  | 0.1533900  |

29

## G17C2A HB

|   |            |            |            |
|---|------------|------------|------------|
| N | 2.5719000  | 1.7438950  | 0.2479264  |
| C | 3.3229537  | 0.6106405  | 0.0597315  |
| N | 4.7002802  | 0.5662372  | 0.0042023  |
| C | 4.9762679  | -0.7218777 | -0.1904762 |
| H | 5.9782091  | -1.1405842 | -0.2870938 |
| N | 3.8569138  | -1.5150272 | -0.2644344 |
| H | 3.8119254  | -2.5184403 | -0.4087284 |
| C | 2.7837614  | -0.6759853 | -0.1068011 |
| C | 1.3730062  | -0.9296402 | -0.0960812 |
| O | 0.7982601  | -2.0255635 | -0.2311478 |
| N | 0.6862406  | 0.2675294  | 0.0965067  |
| H | -0.3502686 | 0.1972703  | 0.0941746  |
| C | 1.2780454  | 1.5103803  | 0.2643267  |
| N | 0.3954410  | 2.5393546  | 0.5410447  |
| H | 0.8447754  | 3.4417043  | 0.4040507  |
| H | -0.5168505 | 2.4710725  | 0.0889654  |
| N | -2.2354325 | -0.0835494 | -0.0417632 |
| C | -2.7919909 | -1.2958952 | 0.2021662  |
| N | -1.9514929 | -2.3262264 | 0.4460533  |
| H | -0.9528200 | -2.2289508 | 0.2046402  |
| H | -2.3437567 | -3.2592911 | 0.4701644  |
| C | -4.2071658 | -1.4367454 | 0.2315286  |
| H | -4.6784649 | -2.4016434 | 0.4337765  |
| C | -4.9632666 | -0.2996511 | -0.0064912 |
| H | -6.0582671 | -0.3461951 | 0.0029474  |
| N | -4.4231974 | 0.9164297  | -0.2693786 |
| C | -3.0905684 | 0.9209232  | -0.2643124 |
| O | -2.4881549 | 2.1119985  | -0.5268551 |
| H | -3.2285242 | 2.7314112  | -0.6495493 |

29

G17C2B HB

|   |            |            |            |
|---|------------|------------|------------|
| C | -1.4834913 | 1.5827914  | 0.1336674  |
| N | -2.5794000 | 0.7484989  | 0.3135173  |
| H | -3.4339026 | 1.2143108  | 0.0168415  |
| H | -2.4838840 | -0.1874157 | -0.0793399 |
| N | -0.2608394 | 0.9377998  | 0.1566376  |
| H | -0.2470850 | -0.0996808 | 0.1952425  |
| C | 0.9914603  | 1.5579162  | 0.0793069  |
| O | 2.0556433  | 0.9270220  | 0.0925168  |
| C | 0.7950077  | 2.9813152  | -0.0112293 |
| C | -0.4771083 | 3.5766788  | -0.0385259 |
| N | -1.6613334 | 2.8806041  | 0.0310280  |
| N | -0.3655295 | 4.9472470  | -0.1490267 |
| N | 1.6925680  | 4.0133403  | -0.1084267 |
| C | 0.9479054  | 5.1653127  | -0.1868911 |
| H | 1.4194463  | 6.1447050  | -0.2700795 |
| H | 2.7030301  | 3.9211319  | -0.1171681 |
| O | -2.1866128 | -2.5372570 | -0.2189263 |
| H | -2.6919313 | -3.3628520 | -0.3097929 |
| C | -0.8952391 | -2.9264824 | -0.0982076 |
| N | -0.0243038 | -1.9276528 | 0.0555411  |
| C | 1.2719334  | -2.3068539 | 0.1556602  |
| H | 1.9886418  | -1.4835068 | 0.2629080  |
| C | 1.6640148  | -3.6392001 | 0.1166220  |
| H | 2.7141515  | -3.9260771 | 0.2081286  |
| C | 0.6403474  | -4.6027743 | -0.0426668 |
| N | -0.6530384 | -4.2407699 | -0.1585823 |
| N | 0.8986621  | -5.9521761 | -0.0300355 |
| H | 0.1486037  | -6.5221769 | -0.4111041 |
| H | 1.8311393  | -6.2374813 | -0.3105780 |

29

G91C1 HB

|   |           |            |            |
|---|-----------|------------|------------|
| N | 1.2500906 | -1.0858228 | -0.1602082 |
|---|-----------|------------|------------|

|   |            |            |            |
|---|------------|------------|------------|
| C | 1.3330497  | 0.2633606  | -0.0829156 |
| N | 0.3275543  | 1.1924834  | -0.1173100 |
| H | -0.6869504 | 0.9528038  | -0.1786715 |
| C | 0.9318313  | 2.4212776  | -0.0001702 |
| H | 0.3398421  | 3.3368944  | 0.0020607  |
| N | 2.2640758  | 2.3699558  | 0.1032996  |
| C | 2.5160654  | 1.0124566  | 0.0525560  |
| C | 3.7102389  | 0.2655558  | 0.1050418  |
| O | 4.9160343  | 0.8522412  | 0.2280818  |
| H | 4.7329374  | 1.8078626  | 0.2637930  |
| N | 3.6813826  | -1.0603557 | 0.0256727  |
| C | 2.4656325  | -1.6600076 | -0.0995006 |
| N | 2.5027121  | -3.0529794 | -0.1148416 |
| H | 3.4190662  | -3.3913823 | -0.3999595 |
| H | 1.7542267  | -3.4548031 | -0.6742902 |
| C | -3.9398157 | -1.6272654 | 0.2352627  |
| H | -4.1896271 | -2.6807927 | 0.3687578  |
| C | -4.9104159 | -0.6643189 | 0.2390136  |
| H | -5.9721838 | -0.8875037 | 0.3759936  |
| N | -4.5752416 | 0.6443532  | 0.0657529  |
| H | -5.2811900 | 1.3754780  | 0.0789074  |
| C | -3.2441898 | 1.0889371  | -0.1092531 |
| O | -3.0084365 | 2.2862021  | -0.2265571 |
| N | -2.2708775 | 0.1097634  | -0.1311253 |
| C | -2.5786926 | -1.1762476 | 0.0392037  |
| N | -1.5779992 | -2.0792942 | -0.0005640 |
| H | -1.7740286 | -3.0382176 | 0.2559528  |
| H | -0.5942409 | -1.7695231 | -0.0595486 |

29

G91C2A HB

|   |            |            |            |
|---|------------|------------|------------|
| N | -0.1736452 | 1.2674121  | -1.0900341 |
| C | -0.1012753 | 1.3416837  | 0.2582105  |
| N | -0.1606515 | 0.3289630  | 1.1804014  |
| H | -0.2371919 | -0.6789332 | 0.9378528  |
| C | -0.0375407 | 0.9220278  | 2.4154063  |
| H | -0.0502707 | 0.3262984  | 3.3284779  |
| N | 0.0921492  | 2.2512613  | 2.3740074  |
| C | 0.0531822  | 2.5148208  | 1.0176963  |
| C | 0.1329704  | 3.7135980  | 0.2793241  |
| O | 0.2760626  | 4.9125878  | 0.8743862  |
| H | 0.3041294  | 4.7245172  | 1.8291954  |
| N | 0.0599784  | 3.6947003  | -1.0465631 |
| C | -0.0858162 | 2.4855528  | -1.6562072 |
| N | -0.0922202 | 2.5323937  | -3.0464338 |
| H | -0.3591362 | 3.4533004  | -3.3864279 |
| H | -0.6451969 | 1.7869968  | -3.4623421 |
| N | 0.1554176  | -4.6297808 | 0.6953303  |
| C | 0.3300102  | -4.9003655 | -0.6214482 |
| H | 0.5309825  | -5.9483380 | -0.8723622 |
| C | 0.2662966  | -3.9384893 | -1.6187107 |
| H | 0.4107861  | -4.1983136 | -2.6702071 |
| C | 0.0010596  | -2.6017512 | -1.2143969 |
| N | -0.1305435 | -1.5862523 | -2.1044790 |
| H | -0.1411511 | -0.6122720 | -1.7675894 |
| H | 0.2249418  | -1.7433923 | -3.0401945 |
| N | -0.1755687 | -2.3148203 | 0.0955479  |
| C | -0.0833414 | -3.3426016 | 0.9507606  |
| O | -0.2538061 | -2.9848122 | 2.2444819  |
| H | -0.1509073 | -3.8155675 | 2.7396279  |

29

G91C2B HB

|   |            |           |            |
|---|------------|-----------|------------|
| N | -1.6663190 | 0.3983851 | -2.2493110 |
| C | -0.8501998 | 0.1553166 | -3.2867222 |

|   |            |            |            |
|---|------------|------------|------------|
| N | -1.1335769 | 0.1861246  | -4.6362722 |
| H | -2.0358634 | 0.3972783  | -5.0510544 |
| C | 0.0327642  | -0.1339041 | -5.3031441 |
| H | 0.0714647  | -0.1801457 | -6.3918179 |
| N | 1.0622451  | -0.3700627 | -4.4941680 |
| C | 0.5115947  | -0.1919282 | -3.2364440 |
| C | 1.0624478  | -0.2643786 | -1.9417409 |
| O | 2.3634037  | -0.5437932 | -1.7202037 |
| H | 2.7599421  | -0.6689374 | -2.6003912 |
| N | 0.3067301  | -0.0336953 | -0.8767852 |
| C | -1.0171726 | 0.2718491  | -1.0754324 |
| N | -1.7556795 | 0.4302708  | 0.0730803  |
| H | -1.1994386 | 0.5684773  | 0.9244515  |
| H | -2.5803156 | 1.0112808  | -0.0463574 |
| N | -0.5699742 | -0.3890168 | 4.9483026  |
| C | 0.7274042  | -0.0643104 | 5.1413915  |
| H | 1.0808495  | -0.1203572 | 6.1783435  |
| C | 1.6038418  | 0.3094139  | 4.1259255  |
| H | 2.6504169  | 0.5467803  | 4.3320586  |
| C | 1.0682418  | 0.3738145  | 2.8182419  |
| N | 1.7844464  | 0.7760814  | 1.7230263  |
| H | 1.3888116  | 0.4673297  | 0.8261098  |
| H | 2.7926235  | 0.6853159  | 1.7978399  |
| N | -0.2335714 | 0.0849407  | 2.6073908  |
| C | -0.9550160 | -0.3010655 | 3.6724626  |
| O | -2.2364068 | -0.6511167 | 3.4239060  |
| H | -2.3178251 | -0.6347537 | 2.4544060  |

29

G92C1 HB

|   |            |            |            |
|---|------------|------------|------------|
| N | 0.3317398  | 0.1273957  | 1.2002177  |
| H | -0.6791986 | 0.1902279  | 0.9524620  |
| C | 0.9256583  | 0.0113167  | 2.4347001  |
| H | 0.3245346  | 0.0137370  | 3.3445622  |
| N | 2.2554237  | -0.0989532 | 2.4004532  |
| C | 2.5287413  | -0.0534285 | 1.0457822  |
| C | 3.7108512  | -0.1119527 | 0.2784582  |
| O | 4.9115652  | -0.2431134 | 0.8650482  |
| H | 5.5392497  | -0.2593792 | 0.1205445  |
| N | 3.6664988  | -0.0315123 | -1.0522226 |
| C | 2.4536635  | 0.0995167  | -1.6536550 |
| N | 2.4828891  | 0.1152217  | -3.0484837 |
| H | 3.3930407  | 0.4132744  | -3.3925996 |
| H | 1.7303350  | 0.6774363  | -3.4399729 |
| N | 1.2503252  | 0.1628732  | -1.0654238 |
| C | 1.3455576  | 0.0856536  | 0.2842359  |
| N | -2.2740264 | 0.1353246  | 0.1068939  |
| C | -3.2496344 | 0.1057383  | 1.0841816  |
| O | -3.0183994 | 0.2250060  | 2.2818425  |
| N | -4.5782904 | -0.0811545 | 0.6361072  |
| H | -5.2860888 | -0.1012547 | 1.3652916  |
| C | -4.9094699 | -0.2540054 | -0.6735669 |
| H | -5.9696078 | -0.3998072 | -0.8990008 |
| C | -3.9368257 | -0.2398774 | -1.6344847 |
| H | -4.1833344 | -0.3711552 | -2.6890587 |
| C | -2.5789890 | -0.0318887 | -1.1794810 |
| N | -1.5762570 | 0.0266759  | -2.0813942 |
| H | -0.5951902 | 0.0713606  | -1.7614510 |
| H | -1.7635071 | -0.2576615 | -3.0344582 |

29

G92C2A HB

|   |           |            |            |
|---|-----------|------------|------------|
| N | 0.9279192 | 0.6446357  | -0.0993461 |
| C | 1.3874657 | -0.6182242 | -0.1217376 |
| O | 0.5454265 | -1.6285191 | -0.2238278 |

|   |            |            |            |
|---|------------|------------|------------|
| H | -0.3962516 | -1.2592885 | -0.2099826 |
| C | 2.7857371  | -0.8294162 | -0.0328366 |
| N | 3.5688128  | -1.9729398 | -0.0309189 |
| C | 4.8011851  | -1.4933966 | 0.0932683  |
| H | 5.7055996  | -2.1016203 | 0.1307379  |
| N | 4.8570210  | -0.1156893 | 0.1744883  |
| H | 5.6849763  | 0.4635377  | 0.2685328  |
| C | 3.5610518  | 0.3406652  | 0.0939471  |
| N | 3.1378188  | 1.6192977  | 0.1403511  |
| C | 1.8059406  | 1.6857580  | 0.0294722  |
| N | 1.2334408  | 2.9452565  | -0.0232264 |
| H | 1.8309940  | 3.6635178  | 0.3762963  |
| H | 0.2693242  | 2.9860012  | 0.2986126  |
| N | -2.0255208 | -0.7889759 | -0.0979497 |
| C | -2.9534835 | -1.7619531 | 0.0500049  |
| H | -2.5702618 | -2.7888258 | 0.0764360  |
| C | -4.3106057 | -1.5009559 | 0.1589527  |
| H | -5.0428841 | -2.3045531 | 0.2641602  |
| C | -4.6860181 | -0.1347243 | 0.1170973  |
| N | -6.0083017 | 0.2488691  | 0.1524537  |
| H | -6.6433620 | -0.3736429 | 0.6414709  |
| H | -6.1338455 | 1.2339745  | 0.3721547  |
| N | -3.7858392 | 0.8500090  | -0.0167489 |
| C | -2.4996251 | 0.4774041  | -0.1244855 |
| O | -1.6283752 | 1.4671778  | -0.2708322 |
| H | -0.7002737 | 1.0689843  | -0.2755529 |

29

G92C2B HB

|   |            |            |            |
|---|------------|------------|------------|
| N | -0.3007972 | 2.9947553  | 1.5701628  |
| C | -0.0660924 | 1.6891934  | 1.7549462  |
| N | -0.0700548 | 1.2162228  | 3.0539041  |
| H | -0.5843662 | 1.8152990  | 3.6931224  |
| H | -0.2865267 | 0.2262200  | 3.1444589  |
| N | 0.2401166  | 0.7572825  | 0.8012505  |
| C | 0.3172992  | 1.1248825  | -0.4869257 |
| O | 0.5926964  | 0.2127703  | -1.4087254 |
| H | 0.5565925  | -0.6870429 | -0.9488755 |
| C | 0.1082796  | 2.4832084  | -0.8220491 |
| N | 0.1190613  | 3.1746322  | -2.0233430 |
| C | -0.1642557 | 4.4192299  | -1.6558524 |
| H | -0.2423926 | 5.2673757  | -2.3369232 |
| N | -0.3603707 | 4.5681005  | -0.2967589 |
| H | -0.5824769 | 5.4225015  | 0.2039462  |
| C | -0.1890265 | 3.3254779  | 0.2695078  |
| N | 0.1806915  | -2.2468059 | -0.3961989 |
| C | 0.1836064  | -2.6592704 | 0.8932691  |
| O | 0.4829049  | -1.7516288 | 1.8199833  |
| H | 0.5130778  | -0.8551757 | 1.3677564  |
| N | -0.0819606 | -3.8959014 | 1.3371727  |
| C | -0.3827804 | -4.7844279 | 0.3706841  |
| H | -0.5995600 | -5.8037584 | 0.7137144  |
| C | -0.4369023 | -4.4827246 | -0.9892225 |
| H | -0.6901121 | -5.2371604 | -1.7375621 |
| C | -0.1423767 | -3.1506576 | -1.3432422 |
| N | -0.0958945 | -2.7188102 | -2.6506547 |
| H | -0.6530448 | -3.2531736 | -3.3095006 |
| H | -0.1713409 | -1.7105930 | -2.7720392 |

29

G19C1 ST

|   |           |           |            |
|---|-----------|-----------|------------|
| N | 0.2809258 | 2.1324506 | -0.6751233 |
| C | 1.6172781 | 1.9101274 | -0.9170598 |
| H | 2.1234543 | 2.3684099 | -1.7658543 |
| N | 2.1944917 | 1.1100686 | -0.0216545 |

|   |            |            |            |
|---|------------|------------|------------|
| C | 1.1539437  | 0.7682737  | 0.8162379  |
| C | 1.1101711  | -0.2293495 | 1.8610403  |
| O | 1.9621599  | -1.0328503 | 2.2319970  |
| N | -0.1883440 | -0.2392346 | 2.4515803  |
| H | -0.3165432 | -0.9785862 | 3.1421189  |
| C | -1.3021841 | 0.4181983  | 1.9809500  |
| N | -2.5063186 | 0.0934148  | 2.6108209  |
| H | -2.4260443 | 0.0649281  | 3.6276993  |
| H | -3.2157006 | 0.7752471  | 2.3415206  |
| N | -1.2996547 | 1.2553779  | 0.9690229  |
| C | -0.0510247 | 1.3748202  | 0.4187026  |
| H | -0.3829378 | 2.5031261  | -1.3540783 |
| N | -1.8618947 | -0.7150382 | -1.5330740 |
| C | -1.6232525 | -1.6316655 | -0.5549940 |
| H | -2.4879858 | -2.0008766 | 0.0036025  |
| C | -0.3366128 | -2.0319774 | -0.3137111 |
| H | -0.0999404 | -2.7749383 | 0.4495317  |
| C | 0.6864050  | -1.4353879 | -1.1400155 |
| N | 1.9890556  | -1.8238513 | -0.9456145 |
| H | 2.6400053  | -1.1400756 | -1.3312879 |
| H | 2.2156668  | -2.0451863 | 0.0244863  |
| N | 0.4447716  | -0.5506867 | -2.0999720 |
| C | -0.8417730 | -0.0834047 | -2.2809611 |
| O | -1.1443800 | 0.8575540  | -3.0150511 |
| H | -2.7922905 | -0.3276780 | -1.6666980 |

29

G17C2B ST

|   |            |            |            |
|---|------------|------------|------------|
| N | 0.1761429  | 1.5322626  | -0.3292571 |
| C | 0.5380056  | 0.8372410  | -1.4596848 |
| N | 1.8100175  | 0.8096400  | -1.9953669 |
| C | 1.7204479  | -0.0513091 | -3.0127221 |
| H | 2.5361072  | -0.3169786 | -3.6852265 |
| N | 0.4626830  | -0.5812918 | -3.1549863 |
| H | 0.1437363  | -1.2470543 | -3.8530921 |
| C | -0.3076869 | -0.0272545 | -2.1674438 |
| C | -1.6620957 | -0.3127448 | -1.7594495 |
| O | -2.4760191 | -1.0804902 | -2.2641857 |
| N | -1.9410420 | 0.4573217  | -0.6127835 |
| H | -2.8784264 | 0.3371078  | -0.2298888 |
| C | -1.0526655 | 1.2821437  | 0.0577048  |
| N | -1.5815954 | 1.9178106  | 1.1783012  |
| H | -2.0460881 | 1.2638292  | 1.8122700  |
| H | -0.8175187 | 2.3722215  | 1.6792763  |
| N | -0.8639892 | -1.2812644 | 2.0841448  |
| C | -0.2593159 | -1.8036362 | 0.9901128  |
| H | -0.8375617 | -2.5557944 | 0.4387958  |
| C | 1.0011858  | -1.4186438 | 0.5458116  |
| H | 1.4599176  | -1.8588380 | -0.3431824 |
| C | 1.6536756  | -0.4043667 | 1.2879540  |
| N | 2.8720432  | 0.1064672  | 0.9006706  |
| H | 3.0640860  | 0.9842982  | 1.3816420  |
| H | 2.9452396  | 0.2253838  | -0.1130221 |
| N | 1.1078395  | 0.0792133  | 2.4206970  |
| C | -0.1075011 | -0.3933234 | 2.7342283  |
| O | -0.6810950 | 0.1435376  | 3.8425338  |
| H | 0.0052806  | 0.7326901  | 4.1992810  |

29

G91C1 ST

|   |            |            |            |
|---|------------|------------|------------|
| N | -0.6846102 | -0.9024906 | -1.4653696 |
| C | 0.5465594  | -0.4391324 | -1.1886943 |
| N | 1.2198141  | 0.6285743  | -1.7384087 |
| H | 0.8087955  | 1.3483672  | -2.3290478 |
| C | 2.4129826  | 0.7405999  | -1.0590908 |

|   |            |            |            |
|---|------------|------------|------------|
| H | 3.1120915  | 1.5471972  | -1.2783158 |
| N | 2.5988436  | -0.2053920 | -0.1372101 |
| C | 1.4300349  | -0.9402225 | -0.2145621 |
| O | 0.9542915  | -2.0367205 | 0.5330990  |
| C | 1.6913948  | -2.6165130 | 1.5021083  |
| H | 2.5482286  | -2.1545751 | 1.4867644  |
| N | -0.2651258 | -2.5177786 | 0.3205240  |
| C | -1.0115338 | -1.9150055 | -0.6458567 |
| N | -2.3331199 | -2.3716391 | -0.7368350 |
| H | -2.4193610 | -3.3234337 | -0.3828214 |
| H | -2.6879893 | -2.2886226 | -1.6891463 |
| N | 0.5191313  | 1.8110652  | 1.3654777  |
| C | -0.1209315 | 0.7788244  | 1.9819377  |
| H | 0.3897578  | 0.3104799  | 2.8286127  |
| C | -1.3462547 | 0.3772279  | 1.5233733  |
| H | -1.8931047 | -0.4399125 | 1.9952430  |
| C | -1.8581463 | 1.0849589  | 0.3767029  |
| N | -3.0987913 | 0.7291420  | -0.1013644 |
| H | -3.2516242 | 1.1040982  | -1.0364662 |
| H | -3.2819867 | -0.2743070 | -0.0476731 |
| N | -1.2228226 | 2.0744107  | -0.2354539 |
| C | 0.0214429  | 2.4721263  | 0.2177465  |
| O | 0.7249655  | 3.3163095  | -0.3330154 |
| H | 1.4590611  | 2.0803612  | 1.6449418  |

29

G91C2A ST

|   |            |            |            |
|---|------------|------------|------------|
| N | -1.7533829 | -0.0181033 | 0.4175257  |
| C | -1.2017468 | -0.6568297 | -0.6283756 |
| N | -1.3709944 | -0.4170017 | -1.9741242 |
| H | -1.7915840 | 0.4274815  | -2.3556476 |
| C | -0.4834093 | -1.2367020 | -2.6356298 |
| H | -0.3883653 | -1.2117364 | -3.7214010 |
| N | 0.2046525  | -2.0491518 | -1.8326678 |
| C | -0.2478384 | -1.6859589 | -0.5758705 |
| C | 0.1624661  | -2.0655529 | 0.7167707  |
| O | 1.1087191  | -3.0145016 | 0.9154646  |
| H | 1.2978360  | -3.3754899 | 0.0312756  |
| N | -0.3292197 | -1.4607105 | 1.7876777  |
| C | -1.2482459 | -0.4693495 | 1.5803034  |
| N | -1.6529674 | 0.1908048  | 2.7287998  |
| H | -1.5881605 | -0.3867703 | 3.5626857  |
| H | -2.5454814 | 0.6652118  | 2.6198132  |
| N | -0.1051134 | 2.8016186  | 0.4597684  |
| C | 0.6424991  | 2.3142249  | 1.4747848  |
| H | 0.4827776  | 2.7718084  | 2.4571805  |
| C | 1.5520180  | 1.2735438  | 1.3165432  |
| H | 2.1224940  | 0.8782545  | 2.1601925  |
| C | 1.6962129  | 0.7509607  | 0.0109356  |
| N | 2.6085272  | -0.2427263 | -0.2850748 |
| H | 2.3641850  | -0.7411595 | -1.1407869 |
| H | 2.8115799  | -0.8731015 | 0.4874846  |
| N | 0.9732219  | 1.2246583  | -1.0223699 |
| C | 0.1055956  | 2.1931991  | -0.7120281 |
| O | -0.6905599 | 2.5850439  | -1.7446624 |
| H | -1.2457871 | 3.2784348  | -1.3467487 |

29

G91C2B ST

|   |            |           |            |
|---|------------|-----------|------------|
| N | -1.2738832 | 1.6884223 | -0.5541213 |
| C | -0.3873792 | 0.9540858 | -1.2477419 |
| N | 0.7373581  | 1.3613912 | -1.9316302 |
| H | 1.1402113  | 2.2936595 | -1.9115337 |
| C | 1.3299303  | 0.2270520 | -2.4436604 |
| H | 2.2610258  | 0.2803004 | -3.0072948 |



|   |            |            |            |
|---|------------|------------|------------|
| N | 0.6645493  | -0.8951212 | -2.1742818 |
| C | -0.4028632 | -0.4417062 | -1.4211719 |
| C | -1.4444850 | -1.1199487 | -0.7614611 |
| O | -1.5583990 | -2.4660834 | -0.8034086 |
| H | -0.8300194 | -2.7653493 | -1.3771334 |
| N | -2.3329358 | -0.4530772 | -0.0348885 |
| C | -2.1993377 | 0.9052110  | 0.0265615  |
| N | -3.1038375 | 1.5352966  | 0.8732087  |
| H | -3.9855790 | 1.0328413  | 0.9428572  |
| H | -3.2211332 | 2.5207714  | 0.6491435  |
| N | 2.0358994  | 1.2813891  | 0.9765993  |
| C | 0.9480776  | 1.5102249  | 1.7451349  |
| H | 0.7598138  | 2.5578614  | 2.0083798  |
| C | 0.0770969  | 0.5129957  | 2.1766338  |
| H | -0.8108934 | 0.7453750  | 2.7689911  |
| C | 0.3774276  | -0.8039937 | 1.7688353  |
| N | -0.4036151 | -1.8835807 | 2.1447056  |
| H | -0.2468051 | -2.6803280 | 1.5291655  |
| H | -1.3964407 | -1.6541980 | 2.1798429  |
| N | 1.4718669  | -1.0702528 | 1.0289117  |
| C | 2.2186359  | -0.0107297 | 0.6803147  |
| O | 3.2951778  | -0.2739725 | -0.0989817 |
| H | 3.2352054  | -1.2310945 | -0.2612042 |

29

G92C1 ST

|   |            |            |            |
|---|------------|------------|------------|
| N | 0.7073986  | 1.2200711  | -1.3677054 |
| C | 0.3717412  | -0.0834620 | -1.3637464 |
| N | -0.6539048 | -0.6977366 | -2.0443236 |
| H | -1.4648325 | -0.2131954 | -2.4295945 |
| C | -0.6526335 | -2.0150240 | -1.6381940 |
| H | -1.4099371 | -2.7134532 | -1.9941795 |
| N | 0.3428867  | -2.3349055 | -0.8147124 |
| C | 0.9872246  | -1.1241710 | -0.6314105 |
| C | 2.0454520  | -0.6999872 | 0.1967076  |
| O | 2.6708646  | -1.5738871 | 1.0148164  |
| H | 3.3531777  | -1.0363207 | 1.4570286  |
| N | 2.4244318  | 0.5745196  | 0.2285147  |
| C | 1.7354748  | 1.4636841  | -0.5427412 |
| N | 2.1083343  | 2.7970094  | -0.3814652 |
| H | 3.0822727  | 2.8894710  | -0.1017049 |
| H | 1.8874313  | 3.3521057  | -1.2056187 |
| N | -1.8227999 | 1.7424750  | 0.4717022  |
| C | -0.8186795 | 1.7978491  | 1.3882349  |
| H | -0.3884433 | 2.7803143  | 1.5991616  |
| C | -0.3818803 | 0.6393964  | 1.9727352  |
| H | 0.4188437  | 0.6457219  | 2.7134514  |
| C | -1.0293995 | -0.5749485 | 1.5463584  |
| N | -0.6413947 | -1.7659366 | 2.1177897  |
| H | -0.8910581 | -2.5593449 | 1.5276184  |
| H | 0.3389429  | -1.7987766 | 2.3908820  |
| N | -2.0027949 | -0.6238376 | 0.6462692  |
| C | -2.3887947 | 0.5365909  | 0.0043468  |
| O | -3.1556057 | 0.5740840  | -0.9590505 |
| H | -2.0873466 | 2.5707109  | -0.0555455 |

29

G92C2A ST

|   |            |            |            |
|---|------------|------------|------------|
| N | -1.6545197 | 0.0872979  | 0.7633858  |
| C | -1.3320822 | -0.7059610 | -0.2702796 |
| N | -1.8692712 | -0.6994351 | -1.5367173 |
| H | -2.5733653 | -0.0501083 | -1.8738585 |
| C | -1.1785458 | -1.6420395 | -2.2694044 |
| H | -1.4101769 | -1.8276616 | -3.3190117 |
| N | -0.2485465 | -2.2915186 | -1.5728816 |

|   |            |            |            |
|---|------------|------------|------------|
| C | -0.3405609 | -1.7106880 | -0.3190060 |
| C | 0.3423856  | -1.8965915 | 0.9007320  |
| O | 1.3054923  | -2.8360940 | 1.0150118  |
| H | 1.5740243  | -2.7836057 | 1.9504993  |
| N | 0.0830875  | -1.1277857 | 1.9517431  |
| C | -0.8747128 | -0.1595469 | 1.8284726  |
| N | -1.0745252 | 0.6285754  | 2.9481706  |
| H | -0.2421043 | 0.6527111  | 3.5328885  |
| H | -1.3671845 | 1.5669226  | 2.6781628  |
| N | -0.3109402 | 2.3420005  | -1.3123272 |
| C | 0.3396140  | 1.5100437  | -2.1598430 |
| H | 0.0133624  | 1.5360035  | -3.2069014 |
| C | 1.3581546  | 0.6548767  | -1.7575039 |
| H | 1.8543492  | -0.0210345 | -2.4574703 |
| C | 1.7160656  | 0.7054930  | -0.3886599 |
| N | 2.7444539  | -0.0651320 | 0.1201520  |
| H | 2.6833953  | -0.1336752 | 1.1349690  |
| H | 2.8334077  | -0.9814695 | -0.3151325 |
| N | 1.1143758  | 1.5464992  | 0.4707538  |
| C | 0.1304477  | 2.2914096  | -0.0494827 |
| O | -0.4989066 | 3.0897655  | 0.8460303  |
| H | -1.1883859 | 3.5283145  | 0.3182310  |

29

G92C2B ST

|   |            |            |            |
|---|------------|------------|------------|
| N | -0.6093422 | 1.7158970  | -0.9513218 |
| C | 0.3279902  | 0.8291241  | -1.3364179 |
| N | 1.6495411  | 1.0432041  | -1.6625714 |
| H | 2.1661503  | 1.8948986  | -1.4609478 |
| C | 2.1994408  | -0.1919705 | -1.9315760 |
| H | 3.2551536  | -0.3001593 | -2.1800221 |
| N | 1.3274222  | -1.1964662 | -1.8622931 |
| C | 0.1618209  | -0.5596209 | -1.4817714 |
| C | -1.1212955 | -1.0533409 | -1.1747350 |
| O | -1.4175992 | -2.3682892 | -1.2374350 |
| H | -0.5962328 | -2.8011993 | -1.5317180 |
| N | -2.0799147 | -0.2299923 | -0.7722735 |
| C | -1.7676080 | 1.0950613  | -0.6697582 |
| N | -2.7841239 | 1.8746376  | -0.1230745 |
| H | -3.7073566 | 1.5244015  | -0.3708509 |
| H | -2.6682290 | 2.8626600  | -0.3386716 |
| N | 2.1411616  | -0.2333499 | 1.2089461  |
| C | 1.6224999  | -1.4710329 | 1.3769329  |
| H | 2.3119660  | -2.3048095 | 1.1985444  |
| C | 0.2955124  | -1.7168550 | 1.7226584  |
| H | -0.0926613 | -2.7332976 | 1.8246254  |
| C | -0.5234595 | -0.5837511 | 1.9339029  |
| N | -1.8479557 | -0.6785433 | 2.3172391  |
| H | -2.3531753 | 0.1748493  | 2.0735544  |
| H | -2.3165019 | -1.4979565 | 1.9357538  |
| N | -0.0248473 | 0.6589619  | 1.8090983  |
| C | 1.2590843  | 0.7457107  | 1.4297208  |
| O | 1.7195189  | 2.0032802  | 1.2113859  |
| H | 0.9274136  | 2.5573399  | 1.3284851  |

29

G19C2A TS

|   |            |            |            |
|---|------------|------------|------------|
| N | -1.0884822 | 2.6274063  | 1.1081966  |
| C | -1.1151903 | 3.2348807  | -0.1252953 |
| H | -1.8105731 | 4.0430036  | -0.3528004 |
| N | -0.2122193 | 2.7395701  | -0.9725878 |
| C | 0.4180997  | 1.7570745  | -0.2345034 |
| C | 1.4543170  | 0.8281119  | -0.6307751 |
| O | 2.0540481  | 0.7111715  | -1.6960846 |
| N | 1.7166883  | -0.0585671 | 0.4494024  |

|   |            |            |            |
|---|------------|------------|------------|
| H | 2.4459831  | -0.7466189 | 0.2649782  |
| C | 1.0679576  | -0.1104295 | 1.6611092  |
| N | 1.4879123  | -1.1336519 | 2.5145439  |
| H | 1.3442909  | -2.0419469 | 2.0610203  |
| H | 0.9038503  | -1.0996079 | 3.3513536  |
| N | 0.1515879  | 0.7519989  | 2.0436297  |
| C | -0.1180494 | 1.6575475  | 1.0585479  |
| H | -1.7111196 | 2.7962484  | 1.8925113  |
| N | -0.3140962 | -2.7422450 | 0.3535098  |
| C | 0.4199202  | -2.8339440 | -0.7847847 |
| H | 1.1474761  | -3.6540257 | -0.8225602 |
| C | 0.2868149  | -1.9545223 | -1.8499085 |
| H | 0.9014501  | -2.0394663 | -2.7484586 |
| C | -0.6529100 | -0.9033157 | -1.6913184 |
| N | -0.8273161 | 0.0486874  | -2.6671557 |
| H | -1.2769090 | 0.8904167  | -2.3065644 |
| H | 0.0384952  | 0.2838898  | -3.1516429 |
| N | -1.4306803 | -0.8145235 | -0.5951646 |
| C | -1.2161436 | -1.7464955 | 0.3426382  |
| O | -2.0243733 | -1.6495067 | 1.4219573  |
| H | -1.7673730 | -2.4044891 | 1.9771271  |

29

G19C2B TS

|   |            |            |            |
|---|------------|------------|------------|
| N | -2.7913346 | -1.0706256 | 0.9946616  |
| C | -3.4017839 | 0.1632526  | 0.9722204  |
| H | -4.2685531 | 0.3866287  | 1.5945872  |
| N | -2.8277291 | 1.0145678  | 0.1223044  |
| C | -1.7984005 | 0.2762222  | -0.4293486 |
| C | -0.8031452 | 0.6669185  | -1.4045309 |
| O | -0.6405419 | 1.7349581  | -1.9863300 |
| N | 0.0786007  | -0.4276953 | -1.6292386 |
| H | 0.8122900  | -0.2447358 | -2.3133140 |
| C | 0.0925711  | -1.6364673 | -0.9704338 |
| N | 1.1255856  | -2.4969686 | -1.3189811 |
| H | 2.0317178  | -2.0240478 | -1.2318053 |
| H | 1.1170158  | -3.2833274 | -0.6684613 |
| N | -0.8237427 | -2.0062269 | -0.0965835 |
| C | -1.7444410 | -1.0194829 | 0.1050115  |
| H | -3.0441273 | -1.8727483 | 1.5637161  |
| N | 2.8507572  | -0.3032030 | 0.1659208  |
| C | 2.8884165  | 0.9163552  | -0.4251726 |
| H | 3.6957464  | 1.0696003  | -1.1517996 |
| C | 1.9712281  | 1.9276291  | -0.1683697 |
| H | 2.0122457  | 2.8878501  | -0.6865671 |
| C | 0.9429037  | 1.6322536  | 0.7589584  |
| N | -0.0412098 | 2.5467949  | 1.0545091  |
| H | -0.8639922 | 2.1126705  | 1.4710672  |
| H | -0.3051283 | 3.1179909  | 0.2522546  |
| N | 0.9147095  | 0.4513025  | 1.4081709  |
| C | 1.8663568  | -0.4326094 | 1.0641489  |
| O | 1.8183420  | -1.6351444 | 1.6813349  |
| H | 0.9978862  | -1.6037457 | 2.2021949  |

29

G17C2A TS

|   |            |            |            |
|---|------------|------------|------------|
| N | -1.4707111 | -0.7981081 | -1.2509877 |
| C | -0.5355082 | -1.5805221 | -0.6075844 |
| N | -0.8276059 | -2.6678306 | 0.1888446  |
| C | 0.3589933  | -3.0548546 | 0.6624575  |
| H | 0.5236125  | -3.9026923 | 1.3275724  |
| N | 1.3965893  | -2.2759365 | 0.2137320  |
| H | 2.3838245  | -2.3627290 | 0.4362113  |
| C | 0.8430929  | -1.3187661 | -0.5912775 |
| C | 1.4482864  | -0.2107896 | -1.2896829 |

|   |            |            |            |
|---|------------|------------|------------|
| O | 2.6295266  | 0.1144931  | -1.3579160 |
| N | 0.4171882  | 0.4960105  | -1.9390735 |
| H | 0.7121048  | 1.3297258  | -2.4453657 |
| C | -0.9394013 | 0.2420184  | -1.8476324 |
| N | -1.7311323 | 1.1826365  | -2.5089515 |
| H | -1.5314003 | 2.1164316  | -2.1385625 |
| H | -2.7088509 | 0.9658418  | -2.3129639 |
| N | 1.2839451  | 1.7357202  | 1.4893057  |
| C | 1.1024554  | 0.7132489  | 2.3569461  |
| H | 1.9603142  | 0.4650479  | 2.9935932  |
| C | -0.0837706 | -0.0061162 | 2.4480293  |
| H | -0.2020512 | -0.8362221 | 3.1487012  |
| C | -1.1353691 | 0.3884553  | 1.5850074  |
| N | -2.3599894 | -0.2444027 | 1.5906627  |
| H | -2.8145946 | -0.1277244 | 0.6836801  |
| H | -2.2831566 | -1.2390722 | 1.8034703  |
| N | -0.9956536 | 1.4315262  | 0.7424454  |
| C | 0.2086657  | 2.0134283  | 0.7437039  |
| O | 0.3426068  | 3.0134111  | -0.1668102 |
| H | 1.2578166  | 3.3201377  | -0.0411663 |

29

G17C2B TS

|   |            |            |            |
|---|------------|------------|------------|
| N | -0.3078115 | -0.6723097 | 0.2047046  |
| C | 0.6816882  | -0.3981462 | 1.1187059  |
| N | 2.0396350  | -0.4900671 | 0.8767375  |
| C | 2.6025899  | -0.1284562 | 2.0319178  |
| H | 3.6750869  | -0.0844158 | 2.2218414  |
| N | 1.6866098  | 0.1932950  | 3.0008374  |
| H | 1.8680465  | 0.4916456  | 3.9544491  |
| C | 0.4497158  | 0.0296744  | 2.4335850  |
| C | -0.8722435 | 0.2150753  | 2.9808900  |
| O | -1.2018733 | 0.5654769  | 4.1104726  |
| N | -1.8087785 | -0.0893791 | 1.9706298  |
| H | -2.7825419 | -0.0670087 | 2.2709677  |
| C | -1.5216605 | -0.5046595 | 0.6754390  |
| N | -2.6306747 | -0.8097040 | -0.1008236 |
| H | -3.3721999 | -0.1140213 | -0.0200413 |
| H | -2.3544428 | -0.8994230 | -1.0868931 |
| N | -1.1969073 | -0.5507846 | -2.7792305 |
| C | -0.1497756 | -1.4007146 | -2.8972177 |
| H | -0.3992878 | -2.4288556 | -3.1848778 |
| C | 1.1658119  | -1.0352824 | -2.6483732 |
| H | 1.9881728  | -1.7490560 | -2.7299242 |
| C | 1.3875664  | 0.3031232  | -2.2571947 |
| N | 2.6591406  | 0.7692629  | -1.9640456 |
| H | 2.5936571  | 1.6590557  | -1.4698268 |
| H | 3.1618238  | 0.0962596  | -1.3841024 |
| N | 0.3774148  | 1.1873232  | -2.1953218 |
| C | -0.8436159 | 0.6911665  | -2.4357822 |
| O | -1.8768269 | 1.5565795  | -2.2798988 |
| H | -1.4438822 | 2.3894856  | -2.0268654 |

29

G91C1 TS

|   |            |            |            |
|---|------------|------------|------------|
| N | 0.2387860  | 0.3874231  | -0.8447718 |
| C | 0.9709197  | -0.6749290 | -0.4471480 |
| N | 0.6036979  | -1.9959158 | -0.3412438 |
| H | -0.3695390 | -2.3485627 | -0.3739094 |
| C | 1.7060600  | -2.6640817 | 0.1399219  |
| H | 1.6736150  | -3.7360049 | 0.3376405  |
| N | 2.7793551  | -1.8929438 | 0.3311263  |
| C | 2.3139141  | -0.6421217 | -0.0279475 |
| C | 2.9183488  | 0.6320743  | 0.0017771  |
| O | 4.2031830  | 0.8061420  | 0.3697290  |

|   |            |            |            |
|---|------------|------------|------------|
| H | 4.5354893  | -0.0870241 | 0.5690015  |
| N | 2.2196628  | 1.7166794  | -0.3161455 |
| C | 0.9273438  | 1.5298042  | -0.7076010 |
| N | 0.2039378  | 2.7144506  | -0.9124240 |
| H | 0.8200584  | 3.4711769  | -1.2067729 |
| H | -0.5550485 | 2.5656361  | -1.5763995 |
| N | -3.3921113 | -0.5256088 | -0.7195356 |
| C | -3.5714115 | 0.8217836  | -0.6259153 |
| H | -4.3238751 | 1.2682265  | -1.2817064 |
| C | -2.8169707 | 1.5372356  | 0.2629904  |
| H | -2.9283250 | 2.6168625  | 0.3687464  |
| C | -1.8920253 | 0.7802739  | 1.0677704  |
| N | -1.1239855 | 1.4533982  | 1.9843666  |
| H | -0.3497867 | 0.8863652  | 2.3265931  |
| H | -0.8316281 | 2.3797788  | 1.6772052  |
| N | -1.7674095 | -0.5380939 | 1.0122293  |
| C | -2.4285056 | -1.2248655 | 0.0256253  |
| O | -2.1985828 | -2.4072135 | -0.2688355 |
| H | -3.8706204 | -1.0710864 | -1.4318578 |

29

G91C2A TS

|   |            |            |            |
|---|------------|------------|------------|
| N | -1.9641282 | 1.3989188  | 0.3656103  |
| C | -0.8034684 | 2.0592293  | 0.2226558  |
| N | -0.3721147 | 3.1675731  | 0.9216844  |
| H | -0.9135718 | 3.6862250  | 1.6063326  |
| C | 0.9243691  | 3.4137801  | 0.5255863  |
| H | 1.5000869  | 4.2438776  | 0.9367891  |
| N | 1.3753986  | 2.5571894  | -0.3904360 |
| C | 0.2932773  | 1.7144179  | -0.5931992 |
| C | 0.0918886  | 0.5545739  | -1.3763930 |
| O | 1.0557131  | 0.1176972  | -2.2020442 |
| H | 0.7489446  | -0.7604206 | -2.4970257 |
| N | -1.0397862 | -0.1331483 | -1.2843815 |
| C | -1.9950416 | 0.3026892  | -0.4112549 |
| N | -3.1440512 | -0.4680859 | -0.3739733 |
| H | -2.9412906 | -1.4516807 | -0.5403235 |
| H | -3.6714577 | -0.3197264 | 0.4833693  |
| N | -0.7244772 | -2.3484313 | 1.0871759  |
| C | -0.4384276 | -1.2324340 | 1.7984955  |
| H | -1.1862573 | -0.9263541 | 2.5397913  |
| C | 0.7232924  | -0.4902194 | 1.6181420  |
| H | 0.9342879  | 0.4027111  | 2.2123586  |
| C | 1.6188775  | -0.9457456 | 0.6194290  |
| N | 2.7963206  | -0.2818337 | 0.3473365  |
| H | 3.1650678  | -0.5580198 | -0.5618090 |
| H | 2.7179284  | 0.7341759  | 0.4123182  |
| N | 1.3690086  | -2.0617247 | -0.0910583 |
| C | 0.2196712  | -2.6853595 | 0.1965560  |
| O | -0.0086819 | -3.7982696 | -0.5361373 |
| H | -0.8569034 | -4.1310262 | -0.1980708 |

29

G91C2B TS

|   |            |            |            |
|---|------------|------------|------------|
| N | 0.4655948  | -0.0161502 | 0.2428998  |
| C | -0.5365708 | -0.1091642 | 1.1388549  |
| N | -1.8888454 | -0.2369775 | 0.9155418  |
| H | -2.3068863 | -0.3077835 | -0.0216401 |
| C | -2.4883723 | -0.2794660 | 2.1541458  |
| H | -3.5693482 | -0.3778641 | 2.2584246  |
| N | -1.6341309 | -0.1876040 | 3.1759223  |
| C | -0.4106861 | -0.0824225 | 2.5390261  |
| C | 0.9054032  | 0.0574785  | 3.0287859  |
| O | 1.1750343  | 0.1105457  | 4.3485669  |
| H | 0.3113645  | 0.0322532  | 4.7904916  |

|   |            |            |            |
|---|------------|------------|------------|
| N | 1.9306352  | 0.1505962  | 2.1904717  |
| C | 1.6547157  | 0.1055885  | 0.8553870  |
| N | 2.7737100  | 0.1447044  | 0.0236132  |
| H | 3.5565107  | 0.6151881  | 0.4727028  |
| H | 2.5473818  | 0.5365677  | -0.8880041 |
| N | -1.7144282 | -0.4423624 | -1.9257967 |
| C | -0.9872178 | -1.5382397 | -2.2392083 |
| H | -1.4522143 | -2.5045359 | -2.0106991 |
| C | 0.2786810  | -1.4822180 | -2.8076877 |
| H | 0.8440527  | -2.3874924 | -3.0399164 |
| C | 0.7996171  | -0.1929582 | -3.0513638 |
| N | 2.0372677  | -0.0064778 | -3.6328684 |
| H | 2.3878947  | 0.9444731  | -3.5526428 |
| H | 2.7297386  | -0.7255119 | -3.4463709 |
| N | 0.0918424  | 0.9148989  | -2.7759305 |
| C | -1.1058312 | 0.7152598  | -2.2112261 |
| O | -1.8022668 | 1.8172766  | -1.8648734 |
| H | -1.2163341 | 2.5576486  | -2.0958387 |

29

G92C1 TS

|   |            |            |            |
|---|------------|------------|------------|
| N | -0.3777360 | 0.2532268  | 0.8008688  |
| C | 0.6807703  | 0.9963702  | 0.4091547  |
| N | 1.9942959  | 0.6117094  | 0.3041100  |
| H | 2.3347009  | -0.3643152 | 0.3385119  |
| C | 2.6772314  | 1.7134252  | -0.1584258 |
| H | 3.7498590  | 1.6698859  | -0.3512874 |
| N | 1.9256681  | 2.7995894  | -0.3372182 |
| C | 0.6635031  | 2.3530794  | 0.0099180  |
| C | -0.6174052 | 2.9464833  | 0.0071588  |
| O | -0.7798211 | 4.2378185  | -0.3286030 |
| H | -1.7406026 | 4.3818158  | -0.2616492 |
| N | -1.6999010 | 2.2342092  | 0.3220362  |
| C | -1.5220844 | 0.9342854  | 0.6874112  |
| N | -2.7062898 | 0.2059769  | 0.8854065  |
| H | -3.4572442 | 0.8109336  | 1.2157109  |
| H | -2.5447087 | -0.5701674 | 1.5267324  |
| N | 0.5230500  | -3.3922198 | 0.7563786  |
| C | -0.8246475 | -3.5724614 | 0.6670563  |
| H | -1.2712261 | -4.3102382 | 1.3393283  |
| C | -1.5394819 | -2.8395252 | -0.2402205 |
| H | -2.6186448 | -2.9558117 | -0.3462696 |
| C | -0.7816167 | -1.9322815 | -1.0649777 |
| N | -1.4538446 | -1.1887598 | -2.0034615 |
| H | -0.8847044 | -0.4233822 | -2.3622499 |
| H | -2.3799787 | -0.8876391 | -1.7045580 |
| N | 0.5353900  | -1.8031665 | -1.0089497 |
| C | 1.2218051  | -2.4411217 | -0.0060906 |
| O | 2.4018051  | -2.2011153 | 0.2856757  |
| H | 1.0666747  | -3.8498699 | 1.4837556  |

29

G92C2A TS

|   |            |            |            |
|---|------------|------------|------------|
| N | 0.0436496  | 0.9600726  | 2.4718327  |
| C | -0.8816118 | 0.1783495  | 1.8923805  |
| N | -2.2539501 | 0.2739580  | 1.9467287  |
| H | -2.7789512 | 1.0192540  | 2.3927382  |
| C | -2.7603137 | -0.7390350 | 1.1601628  |
| H | -3.8341229 | -0.8751046 | 1.0274086  |
| N | -1.8227869 | -1.5173341 | 0.6213430  |
| C | -0.6512025 | -0.9456167 | 1.0821507  |
| C | 0.7023416  | -1.2581288 | 0.8569568  |
| O | 1.0807882  | -2.2848861 | 0.0658895  |
| H | 0.2510661  | -2.6782038 | -0.2587665 |
| N | 1.6632915  | -0.5196497 | 1.3958471  |

|   |            |            |            |
|---|------------|------------|------------|
| C | 1.2832598  | 0.5492613  | 2.1601679  |
| N | 2.3351116  | 1.3289764  | 2.6165422  |
| H | 3.1914412  | 0.7989714  | 2.7538284  |
| H | 2.0793527  | 1.9060002  | 3.4135044  |
| N | -1.3233471 | 0.4811987  | -2.7747423 |
| C | -0.4117317 | -0.1695755 | -3.5324241 |
| H | -0.7779384 | -0.5791273 | -4.4814926 |
| C | 0.9162468  | -0.3314023 | -3.1551705 |
| H | 1.6294340  | -0.8661297 | -3.7876494 |
| C | 1.2981815  | 0.2304296  | -1.9118173 |
| N | 2.5951394  | 0.1728849  | -1.4506143 |
| H | 2.6371507  | 0.2318613  | -0.4297178 |
| H | 3.1140546  | -0.6304912 | -1.7968626 |
| N | 0.4142782  | 0.8973476  | -1.1435634 |
| C | -0.8309960 | 0.9653388  | -1.6267998 |
| O | -1.7106110 | 1.6144723  | -0.8255078 |
| H | -2.5440157 | 1.5632824  | -1.3246093 |

29

G92C2B TS

|   |            |            |            |
|---|------------|------------|------------|
| N | -1.4412896 | 1.3633421  | 0.9098713  |
| C | -0.5123434 | 1.5826750  | -0.0377588 |
| N | 0.4758826  | 2.5399378  | -0.0831477 |
| H | 0.7367308  | 3.1530247  | 0.6836016  |
| C | 1.2029732  | 2.3124404  | -1.2324791 |
| H | 2.0642799  | 2.9288901  | -1.4898447 |
| N | 0.7439072  | 1.3006813  | -1.9669611 |
| C | -0.3234877 | 0.8411539  | -1.2177971 |
| C | -1.1777497 | -0.2677003 | -1.3764522 |
| O | -1.0421918 | -1.1308647 | -2.4088591 |
| H | -0.3021251 | -0.7793196 | -2.9360800 |
| N | -2.1224136 | -0.5279337 | -0.4833601 |
| C | -2.2132759 | 0.3068680  | 0.5953435  |
| N | -3.2766250 | 0.0433694  | 1.4405171  |
| H | -3.5997061 | -0.9184998 | 1.3984860  |
| H | -3.1462769 | 0.4021067  | 2.3819067  |
| N | 2.4494928  | 0.0951542  | 0.6800166  |
| C | 2.6211819  | -0.8074951 | -0.3094506 |
| H | 3.4985578  | -0.6549751 | -0.9494654 |
| C | 1.7484076  | -1.8648053 | -0.5514867 |
| H | 1.9108888  | -2.5678291 | -1.3723013 |
| C | 0.6417001  | -1.9827448 | 0.3174705  |
| N | -0.2797700 | -3.0076748 | 0.1917214  |
| H | -1.1759248 | -2.7353669 | 0.5947572  |
| H | -0.4107643 | -3.2977469 | -0.7760543 |
| N | 0.4622706  | -1.1208562 | 1.3361896  |
| C | 1.3659822  | -0.1304668 | 1.4314305  |
| O | 1.1515132  | 0.7830409  | 2.4068971  |
| H | 0.2581912  | 0.5778415  | 2.7335291  |

32

G19C1W1 HB

|   |            |            |            |
|---|------------|------------|------------|
| O | -1.6898301 | -0.0457317 | 0.8030593  |
| C | -0.5437513 | -0.0464296 | 1.2916674  |
| C | -0.1597485 | 0.0217427  | 2.6774780  |
| N | -0.9287681 | 0.1115440  | 3.8255758  |
| C | -0.0318854 | 0.1477257  | 4.8058894  |
| H | -0.2662905 | 0.2199439  | 5.8678332  |
| N | 1.2667479  | 0.0878002  | 4.3482256  |
| H | 2.1165786  | 0.0960652  | 4.9034277  |
| C | 1.2127639  | 0.0049828  | 2.9763709  |
| N | 2.2811198  | -0.0741641 | 2.1419894  |
| C | 1.8978039  | -0.1428536 | 0.8728953  |
| N | 2.8284145  | -0.3061169 | -0.1094259 |
| H | 3.7736059  | -0.0960126 | 0.1934679  |

|   |            |            |            |
|---|------------|------------|------------|
| H | 2.5885282  | -0.0549351 | -1.0767236 |
| N | 0.5814813  | -0.1201353 | 0.4615072  |
| H | 0.3793521  | -0.1326433 | -0.5620456 |
| C | 0.9814362  | 0.1370357  | -3.2365343 |
| O | 2.1626794  | 0.2368945  | -2.8865775 |
| N | 0.6804911  | 0.1861384  | -4.6098466 |
| H | 1.4782795  | 0.2994352  | -5.2291791 |
| C | -0.5885923 | 0.0920962  | -5.0987477 |
| H | -0.7036718 | 0.1419210  | -6.1848434 |
| C | -1.6403034 | -0.0549637 | -4.2392134 |
| H | -2.6645422 | -0.1294319 | -4.6073461 |
| C | -1.3270882 | -0.1003405 | -2.8274820 |
| N | -2.3105439 | -0.2381513 | -1.9275447 |
| H | -2.0950993 | -0.1912641 | -0.9159707 |
| H | -3.2741198 | -0.2505996 | -2.2358377 |
| N | -0.0694234 | -0.0188033 | -2.3690141 |
| O | -3.7976714 | 0.0866338  | 2.8945883  |
| H | -3.0592802 | 0.1185709  | 3.5212441  |
| H | -3.2859056 | 0.0342519  | 2.0739802  |

32

G19C2AW1 HB

|   |            |            |            |
|---|------------|------------|------------|
| C | -1.7940496 | -1.3453670 | -0.2546132 |
| N | -2.8609093 | -0.5188411 | -0.5120216 |
| H | -2.7629193 | 0.4600653  | -0.2407864 |
| H | -3.7434662 | -0.9436711 | -0.2419814 |
| N | -0.5516943 | -0.7501800 | -0.2692331 |
| H | -0.4975098 | 0.2825719  | -0.3659219 |
| C | 0.6819737  | -1.4089847 | -0.1209042 |
| O | 1.7442435  | -0.7681852 | -0.1696487 |
| C | 0.4909588  | -2.8220474 | 0.0683402  |
| C | -0.8253560 | -3.3117673 | 0.0732751  |
| N | -1.9994108 | -2.6404892 | -0.0786562 |
| N | -0.6865478 | -4.6644823 | 0.2704419  |
| H | -1.4480006 | -5.3337512 | 0.3228708  |
| C | 0.6661138  | -4.9214708 | 0.3710277  |
| H | 1.0450016  | -5.9310175 | 0.5313505  |
| N | 1.4179249  | -3.8317999 | 0.2539762  |
| C | 0.9363319  | 2.8051464  | -0.2630445 |
| N | 1.9626904  | 2.0386145  | -0.6973533 |
| H | 2.9064748  | 2.2954398  | -0.4182961 |
| H | 1.8161078  | 1.0230410  | -0.6510832 |
| C | 1.0975863  | 4.1743806  | 0.0872406  |
| H | 2.0809032  | 4.6495411  | 0.0608742  |
| C | -0.0379383 | 4.8746199  | 0.4601901  |
| H | 0.0237771  | 5.9318491  | 0.7423811  |
| N | -1.2758807 | 4.3194643  | 0.5053945  |
| C | -1.2965668 | 3.0343155  | 0.1573780  |
| O | -2.5144880 | 2.4219171  | 0.1967967  |
| H | -3.1218175 | 3.1219989  | 0.4934345  |
| N | -0.2957608 | 2.2331621  | -0.2239880 |
| O | 4.2986487  | 0.5236659  | 0.1958965  |
| H | 4.7129843  | 0.1169860  | -0.5762356 |
| H | 3.5549527  | -0.0833104 | 0.3468465  |

32

G19C2BW1 HB

|   |            |            |            |
|---|------------|------------|------------|
| C | -1.8779929 | -1.2337140 | 0.1148971  |
| N | -2.8987979 | -0.3179580 | 0.2656077  |
| H | -2.7031612 | 0.6345286  | -0.0392146 |
| H | -3.7894178 | -0.6829629 | -0.0599633 |
| N | -0.6061876 | -0.7230204 | 0.1655009  |
| H | -0.4878097 | 0.3100909  | 0.2100523  |
| C | 0.5991525  | -1.4552228 | 0.1131199  |
| O | 1.6843555  | -0.8671658 | 0.1611041  |



|   |            |            |            |
|---|------------|------------|------------|
| C | 0.3123673  | -2.8695897 | 0.0029123  |
| N | 1.1659525  | -3.9553162 | -0.0776552 |
| C | 0.3481436  | -4.9998345 | -0.1717808 |
| H | 0.6645488  | -6.0395432 | -0.2532785 |
| N | -0.9813029 | -4.6406801 | -0.1573952 |
| H | -1.7862951 | -5.2567027 | -0.2116818 |
| C | -1.0323976 | -3.2708622 | -0.0447973 |
| N | -2.1684969 | -2.5188885 | 0.0016773  |
| C | 0.7449730  | 4.7163432  | -0.0607684 |
| N | 1.0966617  | 6.0426677  | -0.0808076 |
| H | 0.3905987  | 6.6583252  | -0.4741333 |
| H | 2.0501404  | 6.2578338  | -0.3525102 |
| N | -0.5708198 | 4.4420501  | -0.1725159 |
| C | -0.9015378 | 3.1497408  | -0.0818183 |
| O | -2.2195275 | 2.8487429  | -0.1959772 |
| H | -2.6641992 | 3.7056805  | -0.3116199 |
| N | -0.1039105 | 2.0965492  | 0.0978209  |
| C | 1.2165303  | 2.3867465  | 0.1936128  |
| H | 1.8747135  | 1.5195278  | 0.3213978  |
| C | 1.6988281  | 3.6874253  | 0.1256486  |
| H | 2.7664046  | 3.9019497  | 0.2129377  |
| O | 3.9521784  | -2.7879293 | -0.0799903 |
| H | 3.4065151  | -1.9932750 | 0.0143915  |
| H | 3.2456698  | -3.4507858 | -0.0963284 |

32

G17C1W1 HB

|   |            |            |            |
|---|------------|------------|------------|
| C | 0.5550561  | 1.2763806  | -0.0641757 |
| O | 1.7242990  | 0.7991231  | -0.0523018 |
| C | 0.1683298  | 2.6462885  | 0.0349410  |
| C | -1.1868954 | 3.0360480  | 0.0257613  |
| N | -2.2399560 | 2.1704505  | -0.0989064 |
| C | -1.8726264 | 0.9097666  | -0.2068045 |
| H | -3.7467228 | 0.2533802  | -0.2066431 |
| N | -2.8106691 | -0.0687690 | -0.4364922 |
| H | -2.5950498 | -1.0184143 | -0.1135730 |
| N | 0.8983129  | 3.7987101  | 0.1807699  |
| H | 1.9299538  | 3.8192906  | 0.2080311  |
| C | -0.0202844 | 4.8109130  | 0.2496444  |
| H | 0.2891755  | 5.8499452  | 0.3667388  |
| N | -1.2884396 | 4.4021060  | 0.1613717  |
| N | -0.5562656 | 0.4632095  | -0.1822760 |
| H | -0.3719229 | -0.5627137 | -0.2054250 |
| N | 0.0639183  | -2.3750656 | -0.0339586 |
| C | -0.9943116 | -3.2309766 | 0.1578497  |
| O | -2.1694252 | -2.8708014 | 0.2595731  |
| N | -0.6979671 | -4.6052998 | 0.2455954  |
| H | -1.4990474 | -5.2162976 | 0.3804676  |
| C | 0.5660799  | -5.1047433 | 0.1529490  |
| H | 0.6749190  | -6.1899096 | 0.2303388  |
| C | 1.6222180  | -4.2555073 | -0.0229844 |
| H | 2.6436260  | -4.6315832 | -0.0963436 |
| C | 1.3152558  | -2.8445963 | -0.1060118 |
| N | 2.3061169  | -1.9536117 | -0.2814663 |
| H | 3.2664424  | -2.2692219 | -0.2388053 |
| H | 2.0981376  | -0.9415624 | -0.2204522 |
| O | 3.5179494  | 2.9099162  | 0.0584802  |
| H | 3.0155164  | 2.0646459  | 0.0974168  |
| H | 3.7986035  | 2.9296264  | -0.8667492 |

32

G17C2AW1 HB

|   |            |            |           |
|---|------------|------------|-----------|
| N | -2.2467121 | -0.0380234 | 2.2172168 |
| C | -1.1840323 | -0.0490630 | 3.0799862 |
| N | -1.2712950 | -0.1002747 | 4.4518655 |

|   |            |            |            |
|---|------------|------------|------------|
| C | 0.0024360  | -0.0933377 | 4.8546436  |
| H | 0.3226303  | -0.1258927 | 5.8964564  |
| N | 0.9103870  | -0.0423489 | 3.8327877  |
| H | 1.9424165  | -0.0097525 | 3.8466520  |
| C | 0.1670883  | -0.0103786 | 2.6796650  |
| C | 0.5439080  | 0.0307941  | 1.3047232  |
| O | 1.7065284  | 0.0554396  | 0.8204417  |
| N | -0.5780795 | 0.0381861  | 0.4898703  |
| H | -0.3993369 | 0.0545133  | -0.5318630 |
| C | -1.8910563 | 0.0067483  | 0.9496865  |
| N | -2.8469371 | 0.0271082  | -0.0204175 |
| H | -2.6292699 | 0.0663054  | -1.0099929 |
| H | -3.8058395 | -0.0071536 | 0.2976090  |
| N | -0.7244470 | 0.0201116  | -4.7412853 |
| C | 0.5666768  | -0.0778434 | -5.1458860 |
| H | 0.7287453  | -0.1159335 | -6.2291407 |
| C | 1.6378847  | -0.1282633 | -4.2697419 |
| H | 2.6661749  | -0.2069316 | -4.6309721 |
| C | 1.3452964  | -0.0720763 | -2.8775732 |
| N | 2.3086071  | -0.1111332 | -1.9375125 |
| H | 2.0743835  | -0.0538209 | -0.9356094 |
| H | 3.2750752  | -0.1861098 | -2.2245263 |
| N | 0.0592701  | 0.0242203  | -2.4526270 |
| C | -0.8674221 | 0.0620591  | -3.4176678 |
| O | -2.1444065 | 0.1558354  | -2.9560161 |
| H | -2.6895023 | 0.1792681  | -3.7619214 |
| O | 3.5174511  | 0.1516634  | 2.9299107  |
| H | 3.0239526  | 0.0425340  | 2.0869558  |
| H | 3.7785650  | 1.0818494  | 2.8885445  |

32

G17C2BW1 HB

|   |            |            |            |
|---|------------|------------|------------|
| C | 0.6081229  | -0.1046206 | -1.4498900 |
| O | 1.7232463  | -0.1342483 | -0.8826053 |
| N | -0.5738989 | -0.1949864 | -0.7245865 |
| C | -1.8494616 | -0.1530423 | -1.2607776 |
| N | -2.8692729 | -0.3528412 | -0.3391875 |
| H | -3.7599503 | -0.0469905 | -0.7246457 |
| H | -2.6951657 | 0.0221307  | 0.5928445  |
| N | -2.1335166 | -0.0177005 | -2.5356173 |
| C | -1.0146948 | 0.0674074  | -3.3293440 |
| C | 0.3086005  | 0.0207013  | -2.8466507 |
| N | 1.1197293  | 0.1480811  | -3.9441541 |
| H | 2.1513483  | 0.1387515  | -3.8874806 |
| C | 0.2779241  | 0.2605036  | -5.0177319 |
| H | 0.6624471  | 0.3733261  | -6.0317111 |
| N | -1.0182033 | 0.2182300  | -4.6964142 |
| H | -0.4671892 | -0.2478673 | 0.3078452  |
| O | -2.2231465 | 0.1638682  | 2.8638039  |
| H | -2.6713987 | 0.2728903  | 3.7197210  |
| C | -0.9060463 | 0.0720462  | 3.1643748  |
| N | -0.5743412 | 0.1721284  | 4.4562518  |
| C | 0.7426679  | 0.0863542  | 4.7307490  |
| N | 1.0939363  | 0.1150770  | 6.0576028  |
| H | 0.3789152  | 0.4962107  | 6.6708267  |
| H | 2.0400801  | 0.4122805  | 6.2716537  |
| C | 1.6998541  | -0.0830014 | 3.7020859  |
| H | 2.7690322  | -0.1479633 | 3.9167154  |
| C | 1.2165274  | -0.1650418 | 2.4023748  |
| H | 1.8766584  | -0.2823978 | 1.5348888  |
| N | -0.1044439 | -0.0972269 | 2.1109032  |
| O | 3.6538340  | -0.0262610 | -2.8605984 |
| H | 3.1010433  | 0.0143274  | -2.0462050 |
| H | 3.9546757  | -0.9452055 | -2.8472748 |

32

G91C1W1 HB

|   |            |            |            |
|---|------------|------------|------------|
| H | -0.1435274 | -0.9543992 | -4.7602282 |
| O | -0.1288759 | 0.0427839  | -4.6860537 |
| C | -0.0421123 | 0.4026434  | -3.4112249 |
| N | -0.0049504 | 1.7163237  | -3.1694972 |
| C | 0.0213391  | -0.4990789 | -2.3103366 |
| C | 0.1205232  | 0.0958794  | -1.0369873 |
| C | 0.0873895  | 2.1500354  | -1.8887100 |
| N | 0.1543401  | 1.4195874  | -0.7606111 |
| N | 0.0591082  | 3.5352462  | -1.7358541 |
| H | 0.6060142  | 3.8490462  | -0.9374571 |
| H | 0.3361318  | 4.0011211  | -2.5972719 |
| N | 0.0179917  | -1.8827415 | -2.1949391 |
| N | 0.1779961  | -0.9436261 | -0.1448719 |
| C | 0.1102361  | -2.0942257 | -0.8777138 |
| H | 0.1350526  | -3.0744799 | -0.4017638 |
| H | 0.2115236  | -0.8195430 | 0.8947672  |
| O | 0.2401703  | -2.4859367 | 2.9954990  |
| C | 0.1057410  | -1.3329650 | 3.3904000  |
| N | 0.1150792  | -0.2316415 | 2.5582699  |
| N | -0.0765812 | -1.0732505 | 4.7681674  |
| H | -0.0804335 | -1.8917898 | 5.3707195  |
| C | -0.2634653 | 0.1772119  | 5.2751007  |
| H | -0.4031293 | 0.2545670  | 6.3569664  |
| C | -0.2699568 | 1.2620944  | 4.4429938  |
| H | -0.4151600 | 2.2709010  | 4.8321016  |
| C | -0.0685117 | 1.0009659  | 3.0339034  |
| N | -0.0418249 | 2.0274396  | 2.1616011  |
| H | 0.0289099  | 1.8535581  | 1.1444332  |
| H | -0.2900070 | 2.9531638  | 2.4858939  |
| O | -0.2335086 | -2.6126815 | -4.8065288 |
| H | -0.0819188 | -2.6632937 | -3.8311689 |
| H | -1.1689064 | -2.8489043 | -4.8813791 |

32

G91C2AW1 HB

|   |            |            |            |
|---|------------|------------|------------|
| C | -0.1205220 | -2.1484536 | 1.8993002  |
| N | -0.1204948 | -3.5314609 | 1.7503454  |
| H | -0.6005321 | -3.8373771 | 0.9077462  |
| H | -0.4674974 | -3.9934491 | 2.5876782  |
| N | -0.0934297 | -1.4181120 | 0.7688188  |
| C | -0.0365384 | -0.0973708 | 1.0479382  |
| N | -0.0054278 | 0.9424320  | 0.1525156  |
| H | 0.0008892  | 0.8229726  | -0.8833298 |
| C | 0.0457409  | 2.0931346  | 0.8888013  |
| H | 0.0774056  | 3.0747351  | 0.4161578  |
| N | 0.0486744  | 1.8815188  | 2.2081751  |
| C | -0.0019324 | 0.4985516  | 2.3236496  |
| C | -0.0393422 | -0.4023255 | 3.4270306  |
| O | -0.0283982 | -0.0423039 | 4.7042972  |
| H | 0.0217352  | 0.9533765  | 4.7805185  |
| N | -0.0999439 | -1.7139957 | 3.1834771  |
| C | -0.1163940 | 1.2097077  | -3.5185088 |
| O | -0.2613548 | 2.4449616  | -2.9851579 |
| H | -0.3465184 | 3.0310411  | -3.7566094 |
| N | 0.0164404  | 0.2434441  | -2.5999867 |
| C | 0.1719280  | -1.0179973 | -3.0655604 |
| N | 0.3391133  | -2.0041662 | -2.1565062 |
| H | 0.3567958  | -2.9615446 | -2.4834120 |
| H | 0.1892647  | -1.8300898 | -1.1515775 |
| C | 0.1844611  | -1.2584151 | -4.4673384 |
| H | 0.3078100  | -2.2658645 | -4.8722567 |
| C | 0.0328391  | -0.1594280 | -5.2990751 |
| H | 0.0324415  | -0.2839074 | -6.3881730 |

|   |            |           |            |
|---|------------|-----------|------------|
| N | -0.1219436 | 1.1099981 | -4.8482509 |
| O | 0.1826361  | 2.6061494 | 4.8355093  |
| H | 0.0883749  | 2.6661070 | 3.8545071  |
| H | 1.1215997  | 2.8009494 | 4.9650965  |

32

G91C2BW1 HB

|   |            |            |            |
|---|------------|------------|------------|
| C | 1.5292405  | 2.9974472  | -0.1561379 |
| N | 2.8911520  | 3.1489929  | -0.3216862 |
| H | 3.2396484  | 4.0551992  | -0.0260819 |
| H | 3.4416396  | 2.3441811  | -0.0275284 |
| N | 0.8072815  | 4.1547474  | -0.1403552 |
| C | -0.5133653 | 4.0535444  | -0.0602740 |
| O | -1.2218946 | 5.1994662  | -0.0355005 |
| H | -2.1532646 | 4.9228578  | 0.0246079  |
| C | -1.1395223 | 2.7900362  | 0.0031471  |
| N | -2.4660205 | 2.4100519  | 0.0995652  |
| C | -2.3827747 | 1.0774838  | 0.1485190  |
| H | -3.2342864 | 0.4008136  | 0.2234558  |
| N | -1.0967988 | 0.5892550  | 0.0923553  |
| H | -0.7889959 | -0.4044985 | 0.1166609  |
| C | -0.2749673 | 1.6822757  | -0.0037683 |
| N | 1.0712466  | 1.7311969  | -0.0803300 |
| C | 0.3314353  | -4.8351159 | -0.1109766 |
| N | 0.5068508  | -6.1841878 | -0.2972698 |
| H | -0.3183945 | -6.7437306 | -0.1014633 |
| H | 1.3792253  | -6.5802856 | 0.0362735  |
| N | -0.9412404 | -4.3921419 | -0.0942636 |
| C | -1.0947769 | -3.0675662 | 0.0181786  |
| O | -2.3618439 | -2.5970002 | 0.0307095  |
| H | -2.9220719 | -3.3852381 | -0.0686839 |
| N | -0.1517911 | -2.1264113 | 0.1273154  |
| C | 1.1220631  | -2.5899667 | 0.1160164  |
| H | 1.9148043  | -1.8369180 | 0.2055416  |
| C | 1.4226648  | -3.9414916 | -0.0032003 |
| H | 2.4576660  | -4.2906272 | -0.0208333 |
| O | 3.2496346  | 0.0485072  | 0.4556803  |
| H | 2.4164659  | 0.4990406  | 0.1816455  |
| H | 3.1620331  | 0.0765560  | 1.4187813  |

32

G92C1W1 HB

|   |            |            |            |
|---|------------|------------|------------|
| C | -1.4575886 | -0.1353693 | 3.0372583  |
| N | -2.8348497 | -0.1746009 | 3.2548328  |
| H | -3.3181712 | -0.7250827 | 2.5485712  |
| H | -3.0490772 | -0.4971223 | 4.1958990  |
| N | -0.6991380 | -0.0177752 | 4.1600930  |
| C | 0.6240236  | 0.0827835  | 4.0258029  |
| O | 1.3663980  | 0.2003671  | 5.1383256  |
| H | 0.7142313  | 0.1924894  | 5.8616117  |
| N | -1.0371545 | -0.1654010 | 1.7642147  |
| C | 0.3118596  | -0.0675862 | 1.6775603  |
| C | 1.2247096  | 0.0589958  | 2.7498402  |
| N | 2.5292833  | 0.1298644  | 2.2971485  |
| C | 2.3843456  | 0.0475502  | 0.9729468  |
| H | 3.2049554  | 0.0690031  | 0.2551367  |
| N | 1.0825209  | -0.0750138 | 0.5484284  |
| H | 0.7014218  | -0.1149191 | -0.4212974 |
| C | -1.6791365 | 0.0873926  | -2.0115728 |
| N | -2.4178668 | 0.1131729  | -0.8859072 |
| H | -1.9750121 | 0.0138885  | 0.0414933  |
| H | -3.4183991 | 0.2445977  | -0.9510639 |
| N | -0.3558828 | -0.0557315 | -1.8856781 |
| C | 0.4558126  | -0.0777956 | -2.9926456 |
| O | 1.6874433  | -0.2009101 | -2.9105092 |

|   |            |            |            |
|---|------------|------------|------------|
| N | -0.1550327 | 0.0482552  | -4.2497903 |
| H | 0.4957314  | 0.0259369  | -5.0512380 |
| C | -1.4986335 | 0.1840643  | -4.3957011 |
| H | -1.8721799 | 0.2681701  | -5.4201809 |
| C | -2.3188033 | 0.2117220  | -3.2993510 |
| H | -3.3993710 | 0.3208803  | -3.4034046 |
| O | 2.2480759  | -0.1356983 | -5.6261651 |
| H | 2.3754264  | -0.2758223 | -4.6631766 |
| H | 2.6899898  | 0.7129710  | -5.7663361 |

32

G92C2AW1 HB

|   |            |            |            |
|---|------------|------------|------------|
| C | -1.5301142 | 0.3884287  | 1.4136489  |
| N | -2.4687122 | 0.7501899  | 0.4785132  |
| H | -2.1860064 | 0.5542212  | -0.4890496 |
| H | -3.4088260 | 0.4598400  | 0.7297504  |
| N | -0.2428322 | 0.3701544  | 1.0146055  |
| C | 0.6128561  | 0.0545255  | 2.0149479  |
| N | 1.9778287  | -0.0644344 | 1.9633191  |
| H | 2.5778596  | 0.0810423  | 1.1282117  |
| C | 2.3766498  | -0.4059921 | 3.2384502  |
| H | 3.4295225  | -0.5650612 | 3.4742244  |
| N | 1.3828984  | -0.5180085 | 4.1175376  |
| C | 0.2664986  | -0.2289127 | 3.3527901  |
| C | -1.1180005 | -0.1697954 | 3.6247789  |
| O | -1.5848047 | -0.4217302 | 4.8571353  |
| H | -2.5492444 | -0.3132247 | 4.7728794  |
| N | -1.9940610 | 0.1307720  | 2.6690508  |
| C | 0.0758490  | -0.3005711 | -4.6415765 |
| N | 0.7658189  | -0.3873409 | -5.8320015 |
| H | 1.7743224  | -0.4251663 | -5.7055078 |
| H | 0.4086923  | -1.0588063 | -6.5044841 |
| C | -1.3096115 | -0.5794387 | -4.5613861 |
| H | -1.8856714 | -0.9189579 | -5.4253876 |
| C | -1.9006448 | -0.3883588 | -3.3194798 |
| H | -2.9698964 | -0.5845181 | -3.1748182 |
| N | -1.2256259 | 0.0447035  | -2.2307315 |
| C | 0.0861424  | 0.2713281  | -2.4336541 |
| N | 0.7764261  | 0.1177795  | -3.5757325 |
| O | 0.8161000  | 0.7015344  | -1.3988284 |
| H | 0.2855888  | 0.6217051  | -0.5313924 |
| O | 3.3887398  | 0.3815073  | -0.4184226 |
| H | 2.6098877  | 0.3806057  | -1.0102843 |
| H | 3.6948182  | 1.2957003  | -0.4971117 |

32

G92C2BW1 HB

|   |            |            |            |
|---|------------|------------|------------|
| C | 1.4205219  | 1.6396779  | 0.0817377  |
| N | 0.7407298  | 2.8318564  | 0.1317724  |
| H | -0.2709086 | 2.8046671  | 0.2942572  |
| H | 1.2257323  | 3.5343928  | 0.6823931  |
| N | 0.7103331  | 0.5680678  | -0.4004991 |
| C | 1.2945768  | -0.6361607 | -0.4928103 |
| O | 0.5822008  | -1.6768636 | -0.9155803 |
| H | -0.3793079 | -1.3811289 | -0.9141017 |
| C | 2.6574429  | -0.7649364 | -0.1439250 |
| N | 3.5386445  | -1.8353823 | -0.1357780 |
| C | 4.6674286  | -1.2900377 | 0.3027517  |
| H | 5.6059317  | -1.8279164 | 0.4415895  |
| N | 4.5640184  | 0.0593597  | 0.5804178  |
| H | 5.2927916  | 0.6751144  | 0.9265617  |
| C | 3.2673835  | 0.4272742  | 0.3001569  |
| N | 2.7111218  | 1.6419997  | 0.4514919  |
| C | -2.6907281 | -1.8602158 | 0.3054932  |
| N | -2.1799561 | -3.1316130 | 0.4058612  |

|   |            |            |            |
|---|------------|------------|------------|
| H | -2.4956495 | -3.6788859 | 1.1999570  |
| H | -1.1816584 | -3.2054391 | 0.2182501  |
| C | -3.9284747 | -1.4837985 | 0.8729229  |
| H | -4.5354471 | -2.1836182 | 1.4519343  |
| C | -4.3241738 | -0.1649079 | 0.6741830  |
| H | -5.2631209 | 0.2000909  | 1.1070880  |
| N | -3.6056687 | 0.7433976  | -0.0217685 |
| C | -2.4661151 | 0.2732915  | -0.5536742 |
| N | -1.9822399 | -0.9822253 | -0.4301801 |
| O | -1.7418468 | 1.1340508  | -1.2647905 |
| H | -0.7738687 | 0.8816051  | -1.0939625 |
| O | -2.2126861 | 3.4107422  | 0.3947733  |
| H | -2.1322775 | 3.4391705  | -0.5697257 |
| H | -2.8363021 | 2.6665075  | 0.4712641  |

32

G19C1W1 ST

|   |            |            |            |
|---|------------|------------|------------|
| N | -0.2542793 | 1.1465772  | -2.7623390 |
| C | -0.9519718 | 0.1412202  | -3.3982587 |
| H | -1.6083583 | 0.3474406  | -4.2439011 |
| N | -0.7225140 | -1.0636932 | -2.8803295 |
| C | 0.1758853  | -0.8139621 | -1.8628081 |
| C | 0.7378985  | -1.7158421 | -0.8789180 |
| O | 0.5555136  | -2.9145148 | -0.6934120 |
| N | 1.6171870  | -0.9833934 | -0.0304442 |
| H | 2.0613449  | -1.5446800 | 0.6952944  |
| C | 1.7632401  | 0.3814369  | 0.0451429  |
| N | 2.5399320  | 0.8374323  | 1.0966947  |
| H | 2.2019944  | 0.4363573  | 1.9783074  |
| H | 2.4400122  | 1.8504112  | 1.1703752  |
| N | 1.2350769  | 1.2145850  | -0.8323076 |
| C | 0.4798500  | 0.5529608  | -1.7643720 |
| H | -0.2859201 | 2.1423924  | -2.9644776 |
| N | -1.4734367 | 1.0431434  | 0.9164668  |
| C | -2.0582388 | -0.0732190 | 0.4098251  |
| H | -2.7641049 | 0.0690823  | -0.4138370 |
| C | -1.7459710 | -1.3034499 | 0.9257538  |
| H | -2.1917084 | -2.2185571 | 0.5355555  |
| C | -0.7221926 | -1.3191205 | 1.9325867  |
| N | -0.3168992 | -2.5350675 | 2.4257691  |
| H | 0.5230260  | -2.4821125 | 2.9970825  |
| H | -0.3200020 | -3.2957213 | 1.7489003  |
| N | -0.1394692 | -0.2307959 | 2.4278432  |
| C | -0.5041874 | 1.0085968  | 1.9352604  |
| O | 0.0165123  | 2.0665408  | 2.3120252  |
| H | -1.5320923 | 1.9492327  | 0.4269779  |
| O | -0.5258508 | 3.4758568  | -0.0933094 |
| H | -0.3473341 | 3.4876205  | 0.8656229  |
| H | 0.2218747  | 2.9171948  | -0.3813915 |

32

G19C2AW1 ST

|   |            |            |            |
|---|------------|------------|------------|
| N | -0.4172075 | 0.5306965  | 2.3941875  |
| C | 0.8684160  | 0.0654513  | 2.5134823  |
| H | 1.5551383  | 0.4557679  | 3.2639221  |
| N | 1.1540663  | -0.8997178 | 1.6390818  |
| C | -0.0028258 | -1.0241502 | 0.8967135  |
| C | -0.2906374 | -1.8761491 | -0.2350974 |
| O | 0.4155778  | -2.6943291 | -0.8219266 |
| N | -1.6255406 | -1.6480724 | -0.6606965 |
| H | -1.9293479 | -2.2527972 | -1.4232378 |
| C | -2.5131762 | -0.7258539 | -0.1529915 |
| N | -3.7673358 | -0.7103453 | -0.7537324 |
| H | -3.7151865 | -0.6862493 | -1.7723194 |
| H | -4.2906055 | 0.0967617  | -0.4161978 |

|   |            |            |            |
|---|------------|------------|------------|
| N | -2.2623071 | 0.0558320  | 0.8731954  |
| C | -0.9968795 | -0.1422369 | 1.3495667  |
| H | -0.8095377 | 1.3542946  | 2.8421957  |
| N | -0.7703990 | 1.5264383  | -1.4740034 |
| C | 0.0153749  | 0.6932212  | -2.1987442 |
| H | -0.4533982 | 0.2287748  | -3.0755459 |
| C | 1.3358347  | 0.4144862  | -1.8754711 |
| H | 1.9414478  | -0.2776438 | -2.4635490 |
| C | 1.8688466  | 1.0804357  | -0.7418442 |
| N | 3.1789648  | 0.8987891  | -0.3784495 |
| H | 3.3577281  | 1.2567957  | 0.5582064  |
| H | 3.4746959  | -0.0807644 | -0.4884458 |
| N | 1.1188964  | 1.9334122  | -0.0134982 |
| C | -0.1487812 | 2.0734799  | -0.4190499 |
| O | -0.9060933 | 2.8673363  | 0.3809802  |
| H | -1.7952852 | 2.7972307  | -0.0067391 |
| O | 3.1974376  | -1.9898167 | -0.1508574 |
| H | 2.7442283  | -1.7427967 | 0.6766105  |
| H | 2.4500403  | -2.4116490 | -0.6083976 |

32

G19C2BW1 ST

|   |            |            |            |
|---|------------|------------|------------|
| N | -3.3686442 | -0.8161476 | 0.2083040  |
| C | -3.5122112 | -0.2679333 | -1.0458930 |
| H | -4.3308903 | -0.5482737 | -1.7089313 |
| N | -2.5657465 | 0.6290884  | -1.3289835 |
| C | -1.7802925 | 0.6510997  | -0.1891899 |
| C | -0.5532818 | 1.3764693  | 0.0787292  |
| O | 0.0538030  | 2.1778840  | -0.6235977 |
| N | -0.0495988 | 0.9934395  | 1.3508412  |
| H | 0.8931345  | 1.3281318  | 1.5711422  |
| C | -0.5948144 | 0.0699115  | 2.2142209  |
| N | 0.0643939  | -0.0949258 | 3.4066034  |
| H | 1.0697246  | 0.0892781  | 3.3731797  |
| H | -0.2052361 | -0.9501162 | 3.8840183  |
| N | -1.7220897 | -0.5871446 | 1.9862395  |
| C | -2.2528840 | -0.2465688 | 0.7794614  |
| H | -3.9672088 | -1.5073917 | 0.6503672  |
| N | 2.1373852  | -1.2274767 | 0.0804508  |
| C | 0.9256213  | -1.7827625 | -0.1715524 |
| H | 0.5820977  | -2.5362698 | 0.5467284  |
| C | 0.1291123  | -1.4145721 | -1.2488584 |
| H | -0.8505822 | -1.8667610 | -1.4206730 |
| C | 0.6300786  | -0.3933617 | -2.0964634 |
| N | -0.1129160 | 0.1185652  | -3.1299884 |
| H | 0.2651899  | 1.0163021  | -3.4317004 |
| H | -1.1064976 | 0.2039127  | -2.8940106 |
| N | 1.8710866  | 0.1014422  | -1.9179117 |
| C | 2.5245101  | -0.3321217 | -0.8368331 |
| O | 3.7360523  | 0.2287288  | -0.5993011 |
| H | 3.8372793  | 0.8811162  | -1.3138103 |
| O | 2.7077938  | 0.3416135  | 2.3480291  |
| H | 3.5146684  | 0.8007910  | 2.0802827  |
| H | 2.6519242  | -0.3787358 | 1.6803870  |

32

G17C1W1 ST

|   |            |           |            |
|---|------------|-----------|------------|
| N | -1.8573605 | 0.3833674 | -1.0652588 |
| C | -1.3555812 | 1.3439495 | -0.2223621 |
| N | -1.2092229 | 2.6814886 | -0.5400973 |
| C | -0.6646420 | 3.2212608 | 0.5531327  |
| H | -0.4265700 | 4.2777366 | 0.6797261  |
| N | -0.4406949 | 2.3051724 | 1.5500634  |
| H | -0.0564018 | 2.4715023 | 2.4748838  |
| C | -0.8693001 | 1.0954912 | 1.0694258  |

|   |            |            |            |
|---|------------|------------|------------|
| C | -0.7513577 | -0.2323874 | 1.6195113  |
| O | -0.2304912 | -0.5723874 | 2.6835282  |
| N | -1.3169189 | -1.1389545 | 0.7118937  |
| H | -1.1803393 | -2.1390051 | 0.9119863  |
| C | -1.8043685 | -0.8283374 | -0.5488764 |
| N | -2.3226020 | -1.9010456 | -1.2414626 |
| H | -1.8487242 | -2.7866278 | -1.0474860 |
| H | -2.4123924 | -1.6885773 | -2.2315273 |
| N | 2.4078503  | -0.3381106 | 0.7237260  |
| C | 2.5355584  | 0.9931192  | 0.4694981  |
| H | 3.0883834  | 1.5862997  | 1.2031979  |
| C | 1.9733647  | 1.5157389  | -0.6633309 |
| H | 2.0606512  | 2.5741564  | -0.9102986 |
| C | 1.2411601  | 0.5958666  | -1.4964801 |
| N | 0.6313053  | 1.0808256  | -2.6243576 |
| H | -0.1012787 | 0.4484932  | -2.9463219 |
| H | 0.2646940  | 2.0261643  | -2.5081014 |
| N | 1.1542827  | -0.7106916 | -1.2589031 |
| C | 1.7502002  | -1.2313452 | -0.1369045 |
| O | 1.7328070  | -2.4300978 | 0.1793354  |
| H | 2.7510028  | -0.7465023 | 1.5898926  |
| O | -0.5869889 | -3.8003214 | 0.0718709  |
| H | -0.4284431 | -4.6006972 | 0.5876548  |
| H | 0.3121356  | -3.4033353 | -0.0238100 |

32

G17C2AW1 ST

|   |            |            |            |
|---|------------|------------|------------|
| N | -1.4204091 | -0.8148409 | -0.5586058 |
| C | -0.6875216 | -1.9725383 | -0.6514796 |
| N | -0.5639576 | -2.7365036 | -1.7962924 |
| C | 0.2670551  | -3.7209961 | -1.4454783 |
| H | 0.5899037  | -4.5332793 | -2.0969991 |
| N | 0.6928484  | -3.6272281 | -0.1445387 |
| H | 1.3145876  | -4.2564503 | 0.3543405  |
| C | 0.0934075  | -2.5099955 | 0.3816149  |
| C | 0.2654894  | -1.8542935 | 1.6561463  |
| O | 0.9694316  | -2.1930400 | 2.6052817  |
| N | -0.5133509 | -0.6837652 | 1.6581271  |
| H | -0.3792699 | -0.0524213 | 2.4573697  |
| C | -1.2871227 | -0.2198963 | 0.6085450  |
| N | -2.0045400 | 0.9295365  | 0.8775483  |
| H | -1.5975186 | 1.5332553  | 1.5912322  |
| H | -2.2702039 | 1.4138219  | 0.0234251  |
| N | -0.2406701 | 3.4764377  | -0.7524547 |
| C | -0.6884994 | 2.8982472  | -1.8968473 |
| H | -1.4491440 | 3.4574785  | -2.4536364 |
| C | -0.2286183 | 1.6723136  | -2.3559717 |
| H | -0.6116748 | 1.2208911  | -3.2734008 |
| C | 0.7641359  | 1.0276682  | -1.5749257 |
| N | 1.3569258  | -0.1394922 | -1.9876456 |
| H | 1.8471087  | -0.6100530 | -1.2285413 |
| H | 0.7428485  | -0.7753840 | -2.4968148 |
| N | 1.2160762  | 1.5721102  | -0.4264794 |
| C | 0.6776145  | 2.7524169  | -0.1107324 |
| O | 1.1370690  | 3.2870656  | 1.0646957  |
| H | 0.6762361  | 4.1440498  | 1.1145583  |
| O | -0.1582068 | 1.7604244  | 3.0823422  |
| H | 0.0269104  | 2.0276536  | 3.9915108  |
| H | 0.5301894  | 2.2072772  | 2.5549883  |

32

G17C2BW1 ST

|   |           |            |            |
|---|-----------|------------|------------|
| N | 0.6138938 | -0.3204123 | -1.5869497 |
| C | 1.7593538 | -0.3490039 | -0.8310142 |
| N | 2.6056906 | -1.4367355 | -0.7204265 |



|   |            |            |            |
|---|------------|------------|------------|
| C | 3.5209119  | -1.0548837 | 0.1756212  |
| H | 4.3697542  | -1.6557782 | 0.5023349  |
| N | 3.3042084  | 0.2132221  | 0.6510830  |
| H | 3.8607869  | 0.7278062  | 1.3274045  |
| C | 2.1826809  | 0.6827582  | 0.0174392  |
| C | 1.3835676  | 1.8564598  | 0.2776337  |
| O | 1.5916603  | 2.7561765  | 1.0895278  |
| N | 0.2448560  | 1.8106757  | -0.5443839 |
| H | -0.4687022 | 2.5251879  | -0.3580373 |
| C | -0.1057798 | 0.7653542  | -1.3864893 |
| N | -1.2824484 | 0.9526666  | -2.0824140 |
| H | -1.9797607 | 1.5036845  | -1.5736690 |
| H | -1.6353678 | 0.0658780  | -2.4348003 |
| N | -2.0864209 | 0.1482015  | 1.2820372  |
| C | -0.8540457 | -0.1125362 | 1.7893269  |
| H | -0.4714702 | 0.6150663  | 2.5148245  |
| C | -0.0912692 | -1.2088404 | 1.4129922  |
| H | 0.8965214  | -1.3965162 | 1.8405580  |
| C | -0.6349498 | -2.0517297 | 0.4093792  |
| N | 0.0664632  | -3.1180098 | -0.0912716 |
| H | -0.3407742 | -3.4496505 | -0.9644563 |
| H | 1.0669093  | -2.9249758 | -0.1991424 |
| N | -1.8814818 | -1.8467944 | -0.0616937 |
| C | -2.5176887 | -0.7663982 | 0.4060707  |
| O | -3.7531646 | -0.5315189 | -0.0961620 |
| H | -3.9120002 | -1.2809410 | -0.6950537 |
| O | -2.4375065 | 2.6195833  | 0.0129939  |
| H | -3.2147294 | 3.1670206  | 0.1802537  |
| H | -2.5175232 | 1.8755907  | 0.6528748  |

32

G91C1W1 ST

|   |            |            |            |
|---|------------|------------|------------|
| N | -0.8034547 | -2.3417529 | -0.0662833 |
| C | -1.3481406 | -1.1161381 | 0.0337888  |
| N | -2.3872030 | -0.5943111 | -0.7054364 |
| H | -2.8063355 | -1.0339535 | -1.5187609 |
| C | -2.5935055 | 0.6912393  | -0.2673176 |
| H | -3.3564414 | 1.3355939  | -0.7035422 |
| N | -1.7854210 | 1.0393210  | 0.7298235  |
| C | -0.9852001 | -0.0792550 | 0.9172264  |
| C | 0.1255054  | -0.3555142 | 1.7645412  |
| O | 0.6766761  | 0.5133524  | 2.5997892  |
| H | 0.2397883  | 1.4285029  | 2.5030629  |
| N | 0.7022009  | -1.5604518 | 1.6885910  |
| C | 0.2152939  | -2.4676890 | 0.8014230  |
| N | 0.9469449  | -3.6512267 | 0.7253906  |
| H | 1.4067534  | -3.8680745 | 1.6070591  |
| H | 0.3874133  | -4.4246702 | 0.3725543  |
| N | 1.9472582  | 0.9096037  | -0.2571731 |
| C | 2.0707561  | -0.3654527 | -0.7167973 |
| H | 2.7846912  | -1.0134489 | -0.2033698 |
| C | 1.2932414  | -0.7757946 | -1.7673435 |
| H | 1.3382705  | -1.8010994 | -2.1356542 |
| C | 0.3780734  | 0.1994621  | -2.2910005 |
| N | -0.4833769 | -0.1773192 | -3.3096437 |
| H | -0.8685416 | 0.6327239  | -3.7936717 |
| H | -0.1120375 | -0.8798813 | -3.9443115 |
| N | 0.2465411  | 1.4347504  | -1.8322740 |
| C | 1.0113246  | 1.8372969  | -0.7547516 |
| O | 0.9332475  | 2.9495767  | -0.2278755 |
| H | 2.4455331  | 1.1997509  | 0.5822128  |
| O | -0.3502587 | 2.8615055  | 2.2410517  |
| H | 0.1634574  | 3.1596687  | 1.4632396  |
| H | -1.1482867 | 2.5213746  | 1.7848268  |

32

G91C2AW1 ST

|   |            |            |            |
|---|------------|------------|------------|
| N | 1.0792050  | 0.7366025  | -1.9243647 |
| C | 1.3852736  | 0.3341712  | -0.6826796 |
| N | 2.2008131  | -0.7143939 | -0.3105944 |
| H | 2.6174406  | -1.3901051 | -0.9436001 |
| C | 2.1931701  | -0.7748746 | 1.0593382  |
| H | 2.7319874  | -1.5464827 | 1.6076529  |
| N | 1.4617360  | 0.1882688  | 1.6156464  |
| C | 0.9357714  | 0.8821718  | 0.5351760  |
| C | 0.0135746  | 1.9566520  | 0.4129565  |
| O | -0.5683034 | 2.5770742  | 1.4454171  |
| H | -0.3501632 | 2.0916013  | 2.2852039  |
| N | -0.3321452 | 2.3799018  | -0.8012648 |
| C | 0.2057108  | 1.7590854  | -1.8865960 |
| N | -0.2792882 | 2.2012254  | -3.1080967 |
| H | -0.6087286 | 3.1624213  | -3.0757368 |
| H | 0.3555651  | 2.0091938  | -3.8786650 |
| N | -0.5004854 | -2.2620540 | -1.5415571 |
| C | -1.3430170 | -1.2304447 | -1.7865444 |
| H | -1.5272758 | -0.9923092 | -2.8402654 |
| C | -1.9354643 | -0.4801205 | -0.7784517 |
| H | -2.6014273 | 0.3559216  | -1.0048110 |
| C | -1.6111033 | -0.8359069 | 0.5542803  |
| N | -2.1629407 | -0.1795103 | 1.6293065  |
| H | -1.6365717 | -0.2785999 | 2.4961345  |
| H | -2.4368722 | 0.7831278  | 1.4491553  |
| N | -0.7831867 | -1.8642215 | 0.8295155  |
| C | -0.2911210 | -2.4976826 | -0.2404697 |
| O | 0.5666642  | -3.5129630 | 0.0499960  |
| H | 0.7498462  | -3.9030289 | -0.8218785 |
| O | -0.1443595 | 1.0358098  | 3.6007647  |
| H | 0.2604827  | 1.3692755  | 4.4127155  |
| H | 0.5913455  | 0.5710762  | 3.1270642  |

32

G91C2BW1 ST

|   |            |            |            |
|---|------------|------------|------------|
| N | -0.0079428 | -0.2029797 | 1.5493412  |
| C | 1.0741171  | -0.5125853 | 0.8053091  |
| N | 2.2436039  | 0.1901239  | 0.6430682  |
| H | 2.3946962  | 1.1846613  | 0.9148342  |
| C | 2.9979596  | -0.5241623 | -0.2587278 |
| H | 3.9806891  | -0.1724974 | -0.5758712 |
| N | 2.4315468  | -1.6611438 | -0.6771748 |
| C | 1.2234601  | -1.6513856 | -0.0097569 |
| C | 0.1183452  | -2.5232054 | -0.0545911 |
| O | 0.1100754  | -3.6310713 | -0.8253066 |
| H | 0.9876599  | -3.6562378 | -1.2465831 |
| N | -0.9793577 | -2.2565604 | 0.6442887  |
| C | -0.9748352 | -1.1221440 | 1.4049968  |
| N | -2.1852101 | -0.8697106 | 2.0610767  |
| H | -2.6389368 | -1.7375549 | 2.3431857  |
| H | -2.0508702 | -0.2384094 | 2.8492789  |
| N | 0.3432616  | 2.1468272  | -1.0558179 |
| C | 0.2773265  | 1.0620561  | -1.8638849 |
| H | 1.1487016  | 0.8829279  | -2.5041846 |
| C | -0.8027114 | 0.1867375  | -1.8770615 |
| H | -0.8134942 | -0.6947928 | -2.5229383 |
| C | -1.8775635 | 0.4825112  | -1.0046447 |
| N | -3.0033222 | -0.3065528 | -0.9264078 |
| H | -3.4279664 | -0.2228852 | -0.0008997 |
| H | -2.8133471 | -1.2849261 | -1.1400472 |
| N | -1.8541810 | 1.5842141  | -0.2283453 |
| C | -0.7408969 | 2.3187024  | -0.2896549 |
| O | -0.6770159 | 3.3854023  | 0.5465128  |

|   |            |           |            |
|---|------------|-----------|------------|
| H | -1.5133198 | 3.3471607 | 1.0417062  |
| O | 2.3135998  | 2.9384075 | 0.8455894  |
| H | 1.6165357  | 3.2773632 | 1.4274529  |
| H | 1.8203252  | 2.9017406 | -0.0015642 |

32

G92C1W1 ST

|   |            |            |            |
|---|------------|------------|------------|
| N | 1.7447723  | 0.6990956  | 0.4049309  |
| C | 1.2492898  | -0.5352582 | 0.1780733  |
| N | 1.3868716  | -1.3144720 | -0.9416395 |
| H | 1.7537896  | -1.0429129 | -1.8779191 |
| C | 0.6394752  | -2.4441733 | -0.7146995 |
| H | 0.5572402  | -3.2214715 | -1.4753115 |
| N | 0.0570312  | -2.4987592 | 0.4850987  |
| C | 0.4374663  | -1.2980854 | 1.0532187  |
| C | 0.1327682  | -0.6591659 | 2.2701805  |
| O | -0.7035036 | -1.2399189 | 3.1608447  |
| H | -0.7329821 | -0.6086134 | 3.9028244  |
| N | 0.6125668  | 0.5485713  | 2.5529251  |
| C | 1.3774319  | 1.1643317  | 1.6058827  |
| N | 1.7455428  | 2.4778449  | 1.9116147  |
| H | 1.8208184  | 2.6209574  | 2.9169119  |
| H | 2.6000658  | 2.7444333  | 1.4255104  |
| N | -0.6757278 | 2.0495918  | -1.2824978 |
| C | -1.1291257 | 2.1787983  | -0.0060084 |
| H | -0.8915786 | 3.1086132  | 0.5164234  |
| C | -1.8265676 | 1.1451598  | 0.5580036  |
| H | -2.2098337 | 1.2104476  | 1.5767788  |
| C | -1.9821231 | -0.0391281 | -0.2449504 |
| N | -2.6813635 | -1.0986340 | 0.2778048  |
| H | -2.4577656 | -1.9715183 | -0.1991165 |
| H | -2.6019162 | -1.1951009 | 1.2888081  |
| N | -1.5161276 | -0.1639427 | -1.4846612 |
| C | -0.8228982 | 0.8805366  | -2.0468623 |
| O | -0.3121823 | 0.8609496  | -3.1767252 |
| H | -0.1000280 | 2.7727502  | -1.7056026 |
| O | 1.8037290  | -0.7809094 | -3.5884164 |
| H | 2.3943711  | -0.0781188 | -3.8917218 |
| H | 0.9295602  | -0.3294554 | -3.6085642 |

32

G92C2AW1 ST

|   |            |            |            |
|---|------------|------------|------------|
| N | -2.2646534 | -0.2235960 | 0.8428563  |
| C | -1.0316063 | 0.0167414  | 1.3207069  |
| N | -0.3704371 | -0.6479070 | 2.3280405  |
| H | -0.6626909 | -1.5358117 | 2.7266902  |
| C | 0.8743177  | -0.0775996 | 2.4373123  |
| H | 1.6111278  | -0.4440551 | 3.1519989  |
| N | 1.0640192  | 0.9497709  | 1.6106952  |
| C | -0.1210871 | 1.0081507  | 0.8979298  |
| C | -0.5889054 | 1.8063199  | -0.1658087 |
| O | 0.1910238  | 2.7730761  | -0.6988076 |
| H | -0.3628048 | 3.1680932  | -1.3972479 |
| N | -1.7944205 | 1.6132721  | -0.6816221 |
| C | -2.5699092 | 0.6155180  | -0.1581140 |
| N | -3.8359622 | 0.5142992  | -0.7046234 |
| H | -3.8828467 | 0.8562478  | -1.6604596 |
| H | -4.2436648 | -0.4088309 | -0.5829569 |
| N | -0.6495984 | -1.5220518 | -1.4841728 |
| C | 0.0827274  | -0.6182697 | -2.1767520 |
| H | -0.4214048 | -0.1413953 | -3.0262716 |
| C | 1.3899261  | -0.2842447 | -1.8472006 |
| H | 1.9595960  | 0.4535673  | -2.4156320 |
| C | 1.9660780  | -0.9690794 | -0.7472881 |
| N | 3.2731123  | -0.7460356 | -0.3873057 |

|   |            |            |            |
|---|------------|------------|------------|
| H | 3.4770796  | -1.1399015 | 0.5294313  |
| H | 3.5269381  | 0.2476236  | -0.4535511 |
| N | 1.2649686  | -1.8832519 | -0.0459429 |
| C | 0.0037569  | -2.0741293 | -0.4522632 |
| O | -0.7081435 | -2.9333638 | 0.3206494  |
| H | -1.6059199 | -2.8816914 | -0.0512397 |
| O | 3.1339672  | 2.1335456  | -0.0533293 |
| H | 2.4534127  | 2.5622472  | -0.5918904 |
| H | 2.5879851  | 1.8479495  | 0.7059154  |

32

G19C1W1 TS

|   |            |            |            |
|---|------------|------------|------------|
| N | -4.8645335 | 0.6696250  | -0.2145669 |
| C | -4.8778052 | 0.3156327  | -1.5487007 |
| H | -5.7697676 | 0.4386209  | -2.1634581 |
| N | -3.7168547 | -0.1732743 | -1.9728904 |
| C | -2.9170426 | -0.1274255 | -0.8444150 |
| C | -1.5433272 | -0.5297137 | -0.6647438 |
| O | -0.7780805 | -1.0309662 | -1.4970379 |
| N | -1.1277156 | -0.2839583 | 0.6598756  |
| H | -0.1672506 | -0.5609421 | 0.9092835  |
| C | -1.9075139 | 0.2290913  | 1.6777831  |
| N | -1.2724544 | 0.4109107  | 2.8786256  |
| H | -0.4772834 | -0.2112076 | 3.0480681  |
| H | -1.9253645 | 0.5305485  | 3.6467298  |
| N | -3.1738509 | 0.5890512  | 1.5385724  |
| C | -3.6052743 | 0.3922331  | 0.2626271  |
| H | -5.6264292 | 1.0621072  | 0.3289995  |
| N | 4.7132243  | 0.6640278  | 0.2688139  |
| C | 4.9522469  | 0.8715714  | -1.0571377 |
| H | 5.9116902  | 1.3238996  | -1.3222384 |
| C | 4.0067429  | 0.5145207  | -1.9763263 |
| H | 4.1715383  | 0.6667426  | -3.0441653 |
| C | 2.7854674  | -0.0678515 | -1.4596917 |
| N | 1.8259102  | -0.4598975 | -2.3146704 |
| H | 0.9088296  | -0.7486449 | -1.9406282 |
| H | 1.8969743  | -0.2086263 | -3.2921820 |
| N | 2.5653940  | -0.2649665 | -0.1551132 |
| C | 3.5227014  | 0.0906868  | 0.7517969  |
| O | 3.4126878  | -0.0589185 | 1.9795802  |
| H | 5.3961077  | 0.9190560  | 0.9766868  |
| O | 1.0089585  | -1.2076534 | 2.4593084  |
| H | 1.8815776  | -0.7593717 | 2.3230436  |
| H | 1.1927665  | -2.1084339 | 2.1632031  |

32

G19C2AW1 TS

|   |            |            |            |
|---|------------|------------|------------|
| N | -0.2573944 | -5.2038036 | 0.3828152  |
| C | 0.0110724  | -5.0583723 | 1.7283589  |
| H | -0.0095582 | -5.9086621 | 2.4101822  |
| N | 0.2875602  | -3.8050496 | 2.0749399  |
| C | 0.1953344  | -3.1122793 | 0.8816068  |
| C | 0.3668292  | -1.7047163 | 0.6060828  |
| O | 0.6194442  | -0.7802801 | 1.3870957  |
| N | 0.1966946  | -1.4576578 | -0.7696894 |
| H | 0.3143411  | -0.4826104 | -1.0945851 |
| C | -0.1551589 | -2.3756426 | -1.7301045 |
| N | -0.2446187 | -1.8722898 | -3.0125054 |
| H | -0.5026103 | -0.8860420 | -3.0532320 |
| H | -0.7890998 | -2.4769616 | -3.6211147 |
| N | -0.3490239 | -3.6621341 | -1.5034936 |
| C | -0.1441927 | -3.9585467 | -0.1875299 |
| H | -0.4930204 | -6.0584730 | -0.1114410 |
| N | 0.0492940  | 5.3844010  | -0.1416385 |
| C | -0.2227455 | 5.3994199  | 1.1865798  |

|   |            |           |            |
|---|------------|-----------|------------|
| H | -0.3085471 | 6.3905283 | 1.6468405  |
| C | -0.3795685 | 4.2526215 | 1.9489143  |
| H | -0.5885182 | 4.3048146 | 3.0201494  |
| C | -0.2497938 | 3.0036004 | 1.2809258  |
| N | -0.4075521 | 1.8220457 | 1.9227182  |
| H | -0.0313625 | 0.9617267 | 1.5046129  |
| H | -0.3959599 | 1.8430706 | 2.9360963  |
| N | -0.0020738 | 2.9698058 | -0.0500021 |
| C | 0.1388664  | 4.1572623 | -0.6559569 |
| O | 0.4143056  | 4.0640248 | -1.9800856 |
| H | 0.4763374  | 4.9888621 | -2.2744064 |
| O | 0.0383651  | 1.0001171 | -2.0849993 |
| H | 0.7827504  | 1.4267761 | -2.5335388 |
| H | -0.1329191 | 1.6495929 | -1.3627511 |

32

G17C1W1 TS

|   |            |            |            |
|---|------------|------------|------------|
| N | 1.5286631  | 3.1521472  | -0.6210161 |
| C | 0.2644417  | 3.6406126  | -0.4182599 |
| N | -0.1535605 | 4.9242635  | -0.7049631 |
| C | -1.4323556 | 4.9401629  | -0.3338262 |
| H | -2.0970782 | 5.8008042  | -0.4121276 |
| N | -1.8681339 | 3.7409234  | 0.1752958  |
| H | -2.7898909 | 3.5118987  | 0.5317926  |
| C | -0.7906257 | 2.8929985  | 0.1285420  |
| C | -0.6464547 | 1.5260479  | 0.5343945  |
| O | -1.5231748 | 0.8042376  | 1.0439095  |
| N | 0.6547393  | 1.1001983  | 0.2803441  |
| H | 0.9192361  | 0.1467147  | 0.5734594  |
| C | 1.6643282  | 1.8935884  | -0.2586839 |
| N | 2.8598483  | 1.2405331  | -0.4616140 |
| H | 3.0489295  | 0.4843907  | 0.2004817  |
| H | 3.6204464  | 1.9003431  | -0.5987071 |
| N | 0.2786987  | -4.7044608 | -0.6573733 |
| C | -1.0423107 | -4.9364069 | -0.8991767 |
| H | -1.2997453 | -5.8904167 | -1.3671335 |
| C | -1.9668526 | -3.9906451 | -0.5556729 |
| H | -3.0312747 | -4.1507480 | -0.7344916 |
| C | -1.4590649 | -2.7773115 | 0.0491878  |
| N | -2.3209670 | -1.8177241 | 0.4338556  |
| H | -1.9481620 | -0.9035568 | 0.7330035  |
| H | -3.2899288 | -1.8810478 | 0.1497267  |
| N | -0.1602908 | -2.5614885 | 0.2760317  |
| C | 0.7532037  | -3.5197773 | -0.0649197 |
| O | 1.9764259  | -3.4133635 | 0.1136108  |
| H | 0.9901798  | -5.3868053 | -0.9043143 |
| O | 2.4141453  | -0.9913002 | 1.2551252  |
| H | 2.3019969  | -1.8699420 | 0.8139178  |
| H | 2.1587075  | -1.1849099 | 2.1663081  |

32

G17C2AW1 TS

|   |            |            |            |
|---|------------|------------|------------|
| N | -3.7109858 | 0.2700890  | 1.4966166  |
| C | -4.0402423 | 0.0965800  | 0.1743075  |
| N | -5.3147401 | 0.1757636  | -0.3460731 |
| C | -5.1481937 | -0.0371402 | -1.6498812 |
| H | -5.9483626 | -0.0529241 | -2.3901077 |
| N | -3.8372708 | -0.2450759 | -2.0051337 |
| H | -3.4646693 | -0.4321518 | -2.9301482 |
| C | -3.1093544 | -0.1675734 | -0.8456173 |
| C | -1.6993385 | -0.2781225 | -0.5993468 |
| O | -0.7932529 | -0.4669364 | -1.4293413 |
| N | -1.4624820 | -0.1391970 | 0.7643930  |
| H | -0.4846376 | -0.2139990 | 1.1009492  |
| C | -2.4240564 | 0.1363766  | 1.7228441  |

|   |            |            |            |
|---|------------|------------|------------|
| N | -1.9259750 | 0.2053765  | 3.0153842  |
| H | -0.9764968 | 0.5739452  | 3.0684111  |
| H | -2.5814638 | 0.6805562  | 3.6312234  |
| N | 5.4113984  | -0.1243098 | 0.1683353  |
| C | 5.4460145  | 0.1136537  | -1.1653862 |
| H | 6.4424013  | 0.1436222  | -1.6213653 |
| C | 4.3110856  | 0.3046742  | -1.9386418 |
| H | 4.3786355  | 0.4857461  | -3.0141004 |
| C | 3.0553993  | 0.2489614  | -1.2749248 |
| N | 1.8835304  | 0.4508879  | -1.9275659 |
| H | 1.0071525  | 0.1187085  | -1.5072550 |
| H | 1.9123905  | 0.4028736  | -2.9396706 |
| N | 3.0025026  | 0.0343128  | 0.0598779  |
| C | 4.1786960  | -0.1463271 | 0.6776687  |
| O | 4.0651583  | -0.3865219 | 2.0059115  |
| H | 4.9842032  | -0.4866192 | 2.3081575  |
| O | 0.9888501  | 0.0544001  | 2.0540817  |
| H | 1.3800036  | -0.6933260 | 2.5285334  |
| H | 1.6647796  | 0.2021329  | 1.3522786  |

32

G17C2BW1 TS

|   |            |            |            |
|---|------------|------------|------------|
| N | -7.9809978 | -3.4589990 | 8.3279977  |
| C | -6.9769980 | -3.2009991 | 9.1999974  |
| N | -7.0149980 | -3.3829991 | 10.5759970 |
| C | -5.8389984 | -2.9969992 | 11.0089969 |
| H | -5.5759984 | -3.0279992 | 12.0599966 |
| N | -4.9859986 | -2.5549993 | 10.0229972 |
| H | -4.0389989 | -2.2089994 | 10.0709972 |
| C | -5.7499984 | -2.7029992 | 8.8889975  |
| C | -5.3719985 | -2.3939993 | 7.5519979  |
| O | -4.3189988 | -1.9279995 | 7.1179980  |
| N | -6.4069982 | -2.6889992 | 6.6839981  |
| H | -6.2479982 | -2.5959993 | 5.6949984  |
| C | -7.6239979 | -3.1729991 | 7.0789980  |
| N | -8.5289976 | -3.3289991 | 6.1489983  |
| H | -8.3889976 | -3.0179992 | 5.1879985  |
| H | -9.4189974 | -3.6659990 | 6.4669982  |
| N | -6.4249982 | -2.6099993 | 3.6849990  |
| C | -5.0689986 | -2.6599993 | 3.6519990  |
| H | -4.5649987 | -3.6119990 | 3.5269990  |
| C | -4.3769988 | -1.5219996 | 3.8289989  |
| H | -3.2999991 | -1.5529996 | 3.8519989  |
| C | -5.1219986 | -0.3269999 | 3.9919989  |
| N | -4.5079987 | 0.7869998  | 4.3009988  |
| H | -5.0949986 | 1.5729996  | 4.4949987  |
| H | -3.5659990 | 0.6969998  | 4.6649987  |
| N | -6.4349982 | -0.2699999 | 3.9429989  |
| C | -7.0899980 | -1.4199996 | 3.7729989  |
| O | -8.4169976 | -1.5139996 | 3.8119989  |
| H | -8.7519975 | -0.6199998 | 3.8449989  |
| O | -2.5329993 | -0.1520000 | 6.1189983  |
| H | -1.7559995 | -0.3679999 | 6.6489981  |
| H | -3.1869991 | -0.8009998 | 6.4659982  |

32

G91C1W1 TS

|   |            |            |            |
|---|------------|------------|------------|
| N | 0.2556354  | 0.7032173  | -1.0134743 |
| C | -0.5642518 | 0.1221535  | -1.9205435 |
| N | -1.9114597 | -0.1201552 | -1.8459316 |
| H | -2.5492315 | 0.1543689  | -1.0574117 |
| C | -2.2535548 | -0.7340506 | -3.0288135 |
| H | -3.2817899 | -1.0374886 | -3.2285796 |
| N | -1.2350361 | -0.9158834 | -3.8742121 |
| C | -0.1724758 | -0.3762989 | -3.1775616 |

|   |            |            |            |
|---|------------|------------|------------|
| C | 1.1914594  | -0.2359638 | -3.5022823 |
| O | 1.6978712  | -0.6669978 | -4.6706205 |
| H | 0.9440608  | -1.0502777 | -5.1536901 |
| N | 2.0299090  | 0.3470319  | -2.6503826 |
| C | 1.5211249  | 0.7765342  | -1.4660084 |
| N | 2.4659825  | 1.3114270  | -0.5826027 |
| H | 3.2998814  | 1.6113424  | -1.0852533 |
| H | 2.0770893  | 2.0645846  | -0.0166335 |
| N | 0.1705762  | 0.2199714  | 1.8876389  |
| C | 1.4234125  | -0.2108961 | 2.1942982  |
| H | 2.1504664  | -0.1853222 | 1.3771478  |
| C | 1.7139198  | -0.6099430 | 3.4731975  |
| H | 2.7143936  | -0.9438519 | 3.7523467  |
| C | 0.6305621  | -0.5387989 | 4.4146797  |
| N | 0.8674756  | -0.8564199 | 5.7316673  |
| H | 0.0174306  | -1.0001992 | 6.2709463  |
| H | 1.6074544  | -1.5262405 | 5.9136344  |
| N | -0.5931215 | -0.1275622 | 4.1124666  |
| C | -0.8728595 | 0.2669639  | 2.8239570  |
| O | -1.9969939 | 0.6535384  | 2.4740948  |
| H | -0.0221048 | 0.5088673  | 0.9132147  |
| O | -3.4779498 | 0.6320817  | 0.2281085  |
| H | -3.7209782 | 1.5678108  | 0.2172661  |
| H | -2.9584159 | 0.5672270  | 1.0658540  |

32

G91C2AW1 TS

|   |            |            |            |
|---|------------|------------|------------|
| N | 2.2529680  | -0.4508920 | 1.0020433  |
| C | 1.2421909  | -0.2740900 | 1.8691791  |
| N | 1.0213229  | -0.9400696 | 3.0579081  |
| H | 1.6356279  | -1.6335481 | 3.4731145  |
| C | -0.1658821 | -0.4675110 | 3.5722528  |
| H | -0.5712334 | -0.8372987 | 4.5145546  |
| N | -0.7398435 | 0.4612837  | 2.8108334  |
| C | 0.1368873  | 0.5921039  | 1.7451017  |
| C | 0.1346293  | 1.3765401  | 0.5702370  |
| O | -0.8798024 | 2.2143033  | 0.3124068  |
| H | -0.8049748 | 2.4255749  | -0.6421314 |
| N | 1.1299805  | 1.2692454  | -0.3035243 |
| C | 2.1163895  | 0.3576811  | -0.0635828 |
| N | 3.1058710  | 0.3124382  | -1.0299760 |
| H | 2.7442507  | 0.5507636  | -1.9521268 |
| H | 3.6223445  | -0.5635211 | -1.0143889 |
| N | 0.3783633  | -0.1657638 | -2.9862408 |
| C | 0.6542774  | -1.4406462 | -2.6154381 |
| H | 1.4853145  | -1.9258060 | -3.1419227 |
| C | -0.0401613 | -2.1170592 | -1.6226378 |
| H | 0.2265782  | -3.1373842 | -1.3353635 |
| C | -1.1198563 | -1.4263540 | -1.0070921 |
| N | -1.9084084 | -1.9870849 | -0.0530204 |
| H | -2.4720916 | -1.3210986 | 0.5016684  |
| H | -1.5506994 | -2.8111072 | 0.4158180  |
| N | -1.4376206 | -0.1679728 | -1.3884212 |
| C | -0.6468001 | 0.3718759  | -2.3161978 |
| O | -0.9284545 | 1.6784757  | -2.5828510 |
| H | -0.2469520 | 1.9380370  | -3.2273667 |
| O | -3.1730728 | 0.2246306  | 1.2018429  |
| H | -2.8140359 | 0.7347869  | 0.4570604  |
| H | -2.5735418 | 0.4909242  | 1.9230886  |

32

G92C1W1 TS

|   |            |            |            |
|---|------------|------------|------------|
| N | -0.9927552 | -1.4972331 | -0.4736063 |
| C | -0.5918948 | -0.5548448 | -1.3537413 |
| N | -1.3855167 | 0.2726977  | -2.1016196 |

|   |            |            |            |
|---|------------|------------|------------|
| H | -2.4078232 | 0.3369777  | -1.9161774 |
| C | -0.5366065 | 1.1280315  | -2.7551337 |
| H | -0.9142246 | 1.9172403  | -3.4062640 |
| N | 0.7619833  | 0.8965790  | -2.5339581 |
| C | 0.7331923  | -0.1680985 | -1.6508860 |
| C | 1.7140962  | -0.8511044 | -0.9057534 |
| O | 3.0246618  | -0.5441219 | -1.0295373 |
| H | 3.4657915  | -1.1672828 | -0.4235476 |
| N | 1.3757768  | -1.7896728 | -0.0250832 |
| C | 0.0509087  | -2.0573481 | 0.1526480  |
| N | -0.2332619 | -2.9723131 | 1.1681140  |
| H | 0.5194443  | -3.6477531 | 1.2848333  |
| H | -1.1320427 | -3.4272937 | 1.0178511  |
| N | -0.5581657 | 0.1711775  | 2.5967234  |
| C | 0.7789403  | 0.1560385  | 2.8435896  |
| H | 1.1203044  | -0.4526686 | 3.6849074  |
| C | 1.6169077  | 0.8774594  | 2.0376163  |
| H | 2.6943882  | 0.8965121  | 2.2070082  |
| C | 1.0000427  | 1.5682548  | 0.9329941  |
| N | 1.8019320  | 2.2642103  | 0.0655427  |
| H | 1.3576347  | 2.4269239  | -0.8395281 |
| H | 2.7423137  | 1.8900657  | -0.0374046 |
| N | -0.3098202 | 1.5930056  | 0.7093503  |
| C | -1.1525079 | 0.9057541  | 1.5525535  |
| O | -2.3830327 | 0.8739791  | 1.4480068  |
| H | -1.1981138 | -0.3942160 | 3.1483219  |
| O | -3.7252644 | -0.0275656 | -0.7987792 |
| H | -3.3521752 | -0.8913910 | -0.5572162 |
| H | -3.3979061 | 0.5003328  | -0.0395879 |

32

G92C2AW1 TS

|   |            |            |            |
|---|------------|------------|------------|
| N | -2.0315823 | 1.1776044  | 0.7721215  |
| C | -0.7376776 | 1.2393626  | 1.1329479  |
| N | 0.0232856  | 2.3712553  | 1.3381385  |
| H | -0.2977932 | 3.3284988  | 1.2324107  |
| C | 1.2916293  | 1.9572995  | 1.6590078  |
| H | 2.0969965  | 2.6633315  | 1.8604753  |
| N | 1.4125022  | 0.6320672  | 1.6972572  |
| C | 0.1469117  | 0.1668585  | 1.3630294  |
| C | -0.4210729 | -1.1374594 | 1.2430011  |
| O | 0.2196673  | -2.2742730 | 1.4466680  |
| H | 1.2144215  | -2.1089801 | 1.5001828  |
| N | -1.7078484 | -1.2358590 | 0.8918801  |
| C | -2.4125699 | -0.1040616 | 0.6491763  |
| N | -3.6810553 | -0.3253547 | 0.0991261  |
| H | -4.0857087 | -1.1955998 | 0.4426136  |
| H | -4.3001440 | 0.4699528  | 0.2496472  |
| N | 1.5157773  | 1.3178014  | -1.6220862 |
| C | 0.2656455  | 1.7218112  | -1.9537257 |
| H | 0.1254160  | 2.8028523  | -2.0755640 |
| C | -0.7965689 | 0.8448364  | -2.1337831 |
| H | -1.7970930 | 1.1990972  | -2.3914759 |
| C | -0.5241930 | -0.5330171 | -1.9457055 |
| N | -1.4958197 | -1.4914276 | -2.1258814 |
| H | -1.2499971 | -2.3587182 | -1.6488925 |
| H | -2.4286619 | -1.1748392 | -1.8570542 |
| N | 0.7129176  | -0.9642126 | -1.6250232 |
| C | 1.6353671  | -0.0074919 | -1.4920046 |
| O | 2.8774736  | -0.4677383 | -1.1673546 |
| H | 3.4137877  | 0.3414032  | -1.0958286 |
| O | 2.7766068  | -1.7634463 | 1.4337459  |
| H | 2.6311365  | -0.8334610 | 1.7087794  |
| H | 2.9235455  | -1.6408971 | 0.4790502  |



35

G19C1W2 HB

|   |            |            |            |
|---|------------|------------|------------|
| N | -1.2544139 | 0.0273455  | 5.0670915  |
| C | -0.0377370 | 0.2752026  | 5.6702330  |
| H | 0.0500826  | 0.3971994  | 6.7500834  |
| N | 0.9707976  | 0.3446993  | 4.8075923  |
| C | 0.3625744  | 0.1279703  | 3.5835828  |
| C | 0.9247866  | 0.0869022  | 2.2566702  |
| O | 2.1077300  | 0.2377127  | 1.9142842  |
| N | -0.0771239 | -0.1609357 | 1.3010190  |
| H | 0.2420857  | -0.1620535 | 0.3100786  |
| C | -1.4162754 | -0.3598203 | 1.5542933  |
| N | -2.1865807 | -0.6810276 | 0.4689839  |
| H | -1.8647950 | -0.3792091 | -0.4581561 |
| H | -3.1801283 | -0.5745684 | 0.6480016  |
| N | -1.9608957 | -0.3187429 | 2.7617269  |
| C | -1.0213484 | -0.0734566 | 3.7156085  |
| H | -2.1585016 | -0.0740638 | 5.5167829  |
| N | 0.4227431  | -0.0909152 | -3.7755318 |
| C | 1.7490307  | -0.1118309 | -4.0760093 |
| H | 1.9988267  | -0.1428706 | -5.1403302 |
| C | 2.6918569  | -0.0899112 | -3.0841765 |
| H | 3.7584561  | -0.1000359 | -3.3140400 |
| C | 2.2012997  | -0.0481435 | -1.7292211 |
| N | 3.0543100  | -0.0133763 | -0.6962878 |
| H | 2.7027948  | 0.0629202  | 0.2777982  |
| H | 4.0502448  | -0.0197576 | -0.8736236 |
| N | 0.8854822  | -0.0385673 | -1.4507422 |
| C | -0.0319293 | -0.0431293 | -2.4606574 |
| O | -1.2648166 | -0.0085528 | -2.2360411 |
| H | -0.2748596 | -0.1184084 | -4.5496439 |
| O | -1.3701311 | -0.0674300 | -5.8850014 |
| H | -1.7323732 | -0.9324462 | -6.1212306 |
| H | -2.1141561 | 0.3389294  | -5.3773064 |
| O | -3.1478872 | 0.7992626  | -4.0644710 |
| H | -3.1743240 | 1.7477166  | -3.8804713 |
| H | -2.5570201 | 0.4620746  | -3.3536937 |

35

G19C2AW2 HB

|   |            |            |            |
|---|------------|------------|------------|
| C | 1.4872809  | -1.9945768 | 0.2363844  |
| N | 0.6920282  | -3.0834478 | 0.4907155  |
| H | 1.1861861  | -3.9606976 | 0.3565396  |
| H | -0.2587896 | -3.0644730 | 0.1195386  |
| N | 0.8312907  | -0.7948412 | 0.0709983  |
| H | -0.2126204 | -0.7881821 | 0.0712578  |
| C | 1.4420700  | 0.4530887  | -0.1085635 |
| O | 0.7427489  | 1.4744784  | -0.2411156 |
| C | 2.8735549  | 0.3407735  | -0.1059586 |
| N | 3.8464906  | 1.3142562  | -0.2425058 |
| C | 4.9810441  | 0.6260626  | -0.1636636 |
| H | 5.9810480  | 1.0550409  | -0.2301826 |
| N | 4.7862006  | -0.7290572 | 0.0150679  |
| H | 5.4973715  | -1.4476841 | 0.1072196  |
| C | 3.4286992  | -0.9388141 | 0.0581828  |
| N | 2.8043798  | -2.1347963 | 0.2284620  |
| C | -2.7661440 | 0.4853215  | 0.2216835  |
| N | -2.0240443 | 1.5711303  | 0.4913138  |
| H | -1.0203417 | 1.5094243  | 0.2864444  |
| H | -2.4238652 | 2.5142945  | 0.4334321  |
| N | -2.1114949 | -0.6905357 | 0.0080940  |
| C | -2.8838297 | -1.7537042 | -0.2359367 |
| O | -2.1848655 | -2.9051134 | -0.4641553 |
| H | -2.8770632 | -3.5729483 | -0.6123560 |
| N | -4.2094846 | -1.8533236 | -0.2924004 |

|   |            |            |            |
|---|------------|------------|------------|
| C | -4.8494390 | -0.6750721 | -0.0659502 |
| H | -5.9443804 | -0.7115375 | -0.1012215 |
| C | -4.1915903 | 0.5145563  | 0.1928971  |
| H | -4.7357927 | 1.4452365  | 0.3695285  |
| O | -2.2852638 | 4.3891909  | 0.1375305  |
| H | -1.3033572 | 4.4067337  | 0.0949114  |
| H | -2.5226574 | 4.6507803  | -0.7618510 |
| O | 0.4782653  | 4.2351162  | -0.1546649 |
| H | 1.0246378  | 4.4749887  | 0.6051853  |
| H | 0.7477368  | 3.3090015  | -0.3145905 |

35

G19C2BW2 HB

|   |            |            |            |
|---|------------|------------|------------|
| C | 0.0733084  | -1.9002416 | -1.8500867 |
| N | 0.2050163  | -1.1535360 | -3.0014622 |
| H | -0.1596828 | -1.6385302 | -3.8162451 |
| H | -0.0635548 | -0.1720116 | -2.9434007 |
| N | 0.1816063  | -1.2053597 | -0.6727578 |
| H | 0.2505682  | -0.1652476 | -0.7169429 |
| C | 0.1556539  | -1.7469023 | 0.6294837  |
| O | 0.2551775  | -1.0056801 | 1.6128867  |
| C | 0.0027308  | -3.1847385 | 0.5640513  |
| N | -0.0710654 | -4.1271154 | 1.5745728  |
| C | -0.2170140 | -5.2799946 | 0.9277796  |
| H | -0.3104293 | -6.2575571 | 1.4004358  |
| N | -0.2415664 | -5.1257417 | -0.4405734 |
| H | -0.3387856 | -5.8540031 | -1.1409549 |
| C | -0.1009397 | -3.7824768 | -0.7022733 |
| N | -0.0786695 | -3.2117219 | -1.9397345 |
| C | 0.0002561  | 4.3672912  | -0.1834269 |
| N | -0.0434737 | 5.7142586  | -0.0135001 |
| H | -0.1803281 | 6.0708645  | 0.9320656  |
| H | -0.4003861 | 6.2524685  | -0.7950336 |
| C | 0.2239253  | 3.4886716  | 0.9100337  |
| H | 0.3178011  | 3.8774525  | 1.9245781  |
| C | 0.2995041  | 2.1343838  | 0.6283619  |
| H | 0.4521550  | 1.3779387  | 1.4068023  |
| N | 0.1764342  | 1.6439751  | -0.6321671 |
| C | -0.0399838 | 2.5651410  | -1.5709947 |
| O | -0.1833528 | 2.0676875  | -2.8276554 |
| H | -0.3297415 | 2.8486881  | -3.3879134 |
| N | -0.1402730 | 3.8914688  | -1.4410777 |
| O | 0.0041011  | -2.5419738 | 4.1457923  |
| H | -0.0393024 | -3.3086117 | 3.5548192  |
| H | 0.1129363  | -1.8488409 | 3.4779185  |
| O | -0.2922702 | 6.2817572  | 2.8792511  |
| H | 0.4997822  | 6.2428338  | 3.4322779  |
| H | -0.9463716 | 5.8037261  | 3.4068731  |

35

G17C1W2 HB

|   |            |           |            |
|---|------------|-----------|------------|
| N | -1.9456115 | 2.7750688 | -0.3540747 |
| C | -1.0343577 | 3.7595943 | -0.0739256 |
| N | -1.3219986 | 5.1048940 | 0.0399967  |
| C | -0.1465638 | 5.6676861 | 0.3128773  |
| H | 0.0162432  | 6.7341832 | 0.4703704  |
| N | 0.8878115  | 4.7663260 | 0.3828227  |
| H | 1.8657543  | 4.9528370 | 0.5780775  |
| C | 0.3367522  | 3.5342192 | 0.1375025  |
| C | 0.9160348  | 2.2250762 | 0.0934929  |
| O | 2.1134575  | 1.9229053 | 0.2733801  |
| N | -0.0689569 | 1.2862139 | -0.1889694 |
| H | 0.2400174  | 0.2905960 | -0.1985194 |
| C | -1.4098090 | 1.5724049 | -0.4083683 |
| N | -2.1750734 | 0.4895436 | -0.7755487 |

|   |            |            |            |
|---|------------|------------|------------|
| H | -1.8821315 | -0.4289249 | -0.4256050 |
| H | -3.1680666 | 0.6845570  | -0.6822905 |
| N | 0.4170088  | -3.7741859 | -0.0731043 |
| C | 1.7414730  | -4.0790073 | -0.1062052 |
| H | 1.9875060  | -5.1445215 | -0.1262904 |
| C | 2.6881376  | -3.0901101 | -0.1084756 |
| H | 3.7537302  | -3.3238208 | -0.1292724 |
| C | 2.2015442  | -1.7340889 | -0.0760226 |
| N | 3.0604822  | -0.7023719 | -0.0688420 |
| H | 2.7146774  | 0.2687424  | 0.0409383  |
| H | 4.0547856  | -0.8866788 | -0.0445615 |
| N | 0.8887654  | -1.4500688 | -0.0566880 |
| C | -0.0349445 | -2.4573163 | -0.0382108 |
| O | -1.2641357 | -2.2263486 | 0.0068452  |
| H | -0.2830235 | -4.5473478 | -0.0773539 |
| O | -1.3758330 | -5.8783894 | 0.0088804  |
| H | -1.7315816 | -6.1444256 | -0.8501580 |
| H | -2.1255583 | -5.3616453 | 0.3933519  |
| O | -3.1719228 | -4.0435099 | 0.7972220  |
| H | -3.2405214 | -3.8329232 | 1.7379454  |
| H | -2.5762137 | -3.3357680 | 0.4636564  |

35

G17C2AW2 HB

|   |            |            |            |
|---|------------|------------|------------|
| N | -1.7312851 | -0.1116130 | 2.6959764  |
| C | -2.7047401 | -0.0671812 | 1.7316430  |
| N | -4.0551314 | -0.0207014 | 1.9759498  |
| C | -4.5953928 | 0.0049418  | 0.7548472  |
| H | -5.6661323 | 0.0423906  | 0.5515118  |
| N | -3.6857455 | -0.0187915 | -0.2666454 |
| H | -3.9081904 | -0.0245583 | -1.2849813 |
| C | -2.4558964 | -0.0647028 | 0.3396461  |
| C | -1.1247200 | -0.0951760 | -0.1743325 |
| O | -0.7413155 | -0.0897952 | -1.3746387 |
| N | -0.2013045 | -0.1451922 | 0.8569315  |
| H | 0.7971250  | -0.1493673 | 0.5689717  |
| C | -0.5131936 | -0.1582556 | 2.2072802  |
| N | 0.5729380  | -0.3076331 | 3.0532954  |
| H | 1.4299748  | 0.1555278  | 2.7489877  |
| H | 0.3118440  | -0.0703533 | 4.0078124  |
| N | 4.9106363  | 0.4344056  | 0.3891224  |
| C | 5.2159548  | -0.0008515 | -0.8579944 |
| H | 6.2775141  | 0.0277908  | -1.1289418 |
| C | 4.2682825  | -0.4566177 | -1.7618308 |
| H | 4.5510488  | -0.7963319 | -2.7611022 |
| C | 2.9127405  | -0.4609084 | -1.3345649 |
| N | 1.9003622  | -0.9179307 | -2.1118017 |
| H | 0.9396287  | -0.6490007 | -1.8525251 |
| H | 2.0927624  | -1.0380213 | -3.0994876 |
| N | 2.5908902  | -0.0402026 | -0.0872355 |
| C | 3.6096526  | 0.3787935  | 0.6725430  |
| O | 3.2380663  | 0.8087839  | 1.9076568  |
| H | 4.0742247  | 1.0667106  | 2.3339063  |
| O | -4.3321865 | 0.0271981  | -2.9471088 |
| H | -3.5119731 | 0.4116498  | -3.3399869 |
| H | -4.3764800 | -0.8436614 | -3.3643278 |
| O | -1.8783103 | 0.8998893  | -3.6475289 |
| H | -1.4680173 | 0.5219070  | -2.8372558 |
| H | -1.7487291 | 1.8496017  | -3.5231692 |

35

G17C2BW2 HB

|   |           |            |            |
|---|-----------|------------|------------|
| N | 2.6052097 | -0.0599261 | -2.1258347 |
| C | 1.5693739 | 0.0167481  | -3.0226351 |
| N | 1.7164480 | 0.0542575  | -4.3886447 |

|   |            |            |            |
|---|------------|------------|------------|
| C | 0.4618196  | 0.1340255  | -4.8401979 |
| H | 0.1835485  | 0.1832640  | -5.8935194 |
| N | -0.4905827 | 0.1471942  | -3.8592154 |
| H | -1.5175928 | 0.2329072  | -4.0044682 |
| C | 0.2002727  | 0.0736947  | -2.6744360 |
| C | -0.2243115 | 0.0429784  | -1.3073335 |
| O | -1.3807193 | 0.0750711  | -0.8254495 |
| N | 0.8797135  | -0.0265341 | -0.4660316 |
| H | 0.6661507  | -0.0480545 | 0.5497894  |
| C | 2.2012629  | -0.0743469 | -0.8744039 |
| N | 3.1168370  | -0.1430237 | 0.1397040  |
| H | 2.8508722  | -0.1519450 | 1.1163942  |
| H | 4.0903385  | -0.1748936 | -0.1288070 |
| N | 0.1388627  | -0.0269558 | 2.3206763  |
| C | -1.2010474 | 0.0849481  | 2.4847523  |
| H | -1.7803798 | 0.1116235  | 1.5542941  |
| C | -1.7951679 | 0.1611773  | 3.7381032  |
| H | -2.8788768 | 0.2424909  | 3.8496006  |
| C | -0.9318019 | 0.1259404  | 4.8591564  |
| N | -1.4064532 | 0.1343239  | 6.1469591  |
| H | -0.7088343 | 0.3651458  | 6.8487675  |
| H | -2.3160200 | 0.5586720  | 6.2948070  |
| N | 0.4046423  | 0.0226360  | 4.7125428  |
| C | 0.8448836  | -0.0513289 | 3.4520828  |
| O | 2.1848468  | -0.1598248 | 3.2789127  |
| H | 2.5582576  | -0.1649185 | 4.1766470  |
| O | -3.7423941 | -0.7359266 | -1.8898553 |
| H | -2.9079681 | -0.3949546 | -1.4908197 |
| H | -3.6042495 | -1.6921034 | -1.8623790 |
| O | -3.2179675 | 0.3335803  | -4.3063152 |
| H | -3.5565789 | 1.2335845  | -4.2073656 |
| H | -3.5513097 | -0.1091001 | -3.4883834 |

35

G91C1W2 HB

|   |            |            |            |
|---|------------|------------|------------|
| N | -0.2663677 | -2.6596992 | 3.8788648  |
| C | -0.1813382 | -1.3143187 | 3.5277612  |
| H | -0.5998822 | -2.7698904 | 4.8338380  |
| H | -0.8127693 | -3.2025153 | 3.2145316  |
| N | -0.0679383 | -0.4588612 | 4.5808656  |
| N | -0.1721167 | -1.0302491 | 2.2122131  |
| C | 0.0753145  | 0.8343738  | 4.3130802  |
| O | 0.1853371  | 1.6748076  | 5.3594567  |
| H | 0.2736173  | 2.5615006  | 4.9671100  |
| C | 0.1004560  | 1.2911237  | 2.9798080  |
| N | 0.2261621  | 2.5525140  | 2.4301518  |
| C | -0.0301052 | 0.2980631  | 1.9918017  |
| N | 0.0163512  | 0.9741426  | 0.8016210  |
| C | 0.1715131  | 2.3022355  | 1.1175465  |
| H | -0.0180156 | 0.5132240  | -0.1358523 |
| H | 0.2384568  | 3.0584086  | 0.3350715  |
| C | 0.0464622  | -1.9927588 | -1.5025094 |
| N | 0.0156336  | -2.6354815 | -0.3194512 |
| H | -0.0486993 | -2.1145534 | 0.5696528  |
| H | 0.0658063  | -3.6453863 | -0.3029796 |
| C | 0.1222012  | -2.7386149 | -2.7334194 |
| H | 0.1496854  | -3.8291835 | -2.7527787 |
| C | 0.1609551  | -2.0042007 | -3.8892268 |
| H | 0.2206342  | -2.4591526 | -4.8822196 |
| N | 0.1235037  | -0.6463486 | -3.8570782 |
| H | 0.1795448  | -0.1073187 | -4.7477530 |
| C | 0.0386725  | 0.0630686  | -2.6568540 |
| O | 0.0014098  | 1.3060618  | -2.6533169 |
| N | 0.0034967  | -0.6556658 | -1.4885523 |
| H | -0.5174548 | 2.3775985  | -3.9692341 |

|   |            |           |            |
|---|------------|-----------|------------|
| O | -0.6933671 | 2.8770687 | -4.7987738 |
| H | -0.1282985 | 3.6543175 | -4.6992262 |
| O | 0.2355568  | 0.7884184 | -6.2292919 |
| H | -0.1581842 | 1.6252240 | -5.8801766 |
| H | 1.1360400  | 1.0604657 | -6.4525754 |

35

G91C2AW2 HB

|   |            |            |            |
|---|------------|------------|------------|
| N | -1.1747333 | -0.0553983 | -0.6966013 |
| C | -1.4489735 | -0.0682501 | 0.6286943  |
| N | -0.5748153 | -0.0576454 | 1.6844180  |
| H | 0.4511298  | -0.0937088 | 1.5739190  |
| C | -1.3472268 | -0.0733614 | 2.8265146  |
| H | -0.8920928 | -0.0729779 | 3.8170780  |
| N | -2.6613932 | -0.0858663 | 2.5921467  |
| C | -2.7243902 | -0.0855144 | 1.2100650  |
| C | -3.8063213 | -0.0842643 | 0.3007902  |
| O | -5.0840086 | -0.0725660 | 0.7199300  |
| H | -5.0381158 | -0.0675365 | 1.6924832  |
| N | -3.5960501 | -0.0948950 | -1.0087483 |
| C | -2.3032504 | -0.0936820 | -1.4482323 |
| N | -2.1383313 | -0.1809296 | -2.7999208 |
| H | -2.9603537 | 0.0355739  | -3.3510925 |
| H | -1.2151598 | 0.0219099  | -3.1903979 |
| N | 4.4667577  | 0.1940464  | 1.1627036  |
| C | 4.8012543  | -0.2736236 | -0.0660333 |
| H | 5.8709459  | -0.2667447 | -0.3054518 |
| C | 3.8759860  | -0.7430153 | -0.9863573 |
| H | 4.1829292  | -1.1236798 | -1.9633074 |
| C | 2.5075253  | -0.7216314 | -0.6027920 |
| N | 1.5242560  | -1.2284343 | -1.3917952 |
| H | 0.5687843  | -0.9235142 | -1.1632825 |
| H | 1.7035691  | -1.2112168 | -2.3940918 |
| N | 2.1524481  | -0.2369998 | 0.6135312  |
| C | 3.1558450  | 0.1735472  | 1.4053739  |
| O | 2.7370026  | 0.6298760  | 2.6088101  |
| H | 3.5542343  | 0.8907701  | 3.0672274  |
| O | 0.7691873  | 1.9441300  | -1.4736730 |
| H | 1.4721720  | 1.8058802  | -0.8227037 |
| H | 0.0674618  | 1.3494319  | -1.1325918 |
| O | 0.7022134  | 0.3638702  | -3.7094006 |
| H | 0.8655671  | 1.0154189  | -2.9891445 |
| H | 0.7868945  | 0.8960885  | -4.5114249 |

35

G91C2BW2 HB

|   |           |           |           |
|---|-----------|-----------|-----------|
| N | 2.161770  | -2.055890 | -0.258760 |
| C | 1.529210  | -3.236300 | -0.200050 |
| N | 2.082980  | -4.491060 | -0.358150 |
| H | 3.063710  | -4.685110 | -0.535990 |
| C | 1.069900  | -5.408320 | -0.224680 |
| H | 1.243980  | -6.481120 | -0.306180 |
| N | -0.112540 | -4.844300 | 0.008530  |
| C | 0.160400  | -3.480890 | 0.027610  |
| C | -0.641240 | -2.316740 | 0.193190  |
| O | -1.958980 | -2.304860 | 0.371770  |
| H | -2.314320 | -3.241710 | 0.397140  |
| N | -0.049010 | -1.122750 | 0.149930  |
| C | 1.299610  | -1.039830 | -0.060490 |
| N | 1.818700  | 0.229530  | -0.028120 |
| H | 1.135990  | 0.985530  | -0.142580 |
| H | 2.702280  | 0.324730  | -0.519500 |
| N | -0.363410 | 4.933020  | -0.105620 |
| C | -1.655130 | 4.758370  | -0.476430 |
| H | -2.210150 | 5.674460  | -0.709490 |

|   |           |           |           |
|---|-----------|-----------|-----------|
| C | -2.277510 | 3.521490  | -0.557570 |
| H | -3.327060 | 3.429040  | -0.847310 |
| C | -1.486810 | 2.380600  | -0.252570 |
| N | -1.962610 | 1.120400  | -0.287230 |
| H | -1.346680 | 0.331410  | -0.048630 |
| H | -2.929040 | 0.949250  | -0.529230 |
| N | -0.184650 | 2.535660  | 0.093320  |
| C | 0.274970  | 3.792280  | 0.161940  |
| O | 1.564420  | 3.932380  | 0.558560  |
| H | 1.846480  | 3.039010  | 0.817700  |
| O | 1.773240  | 7.001140  | 0.327800  |
| H | 0.935750  | 6.552710  | 0.128680  |
| H | 2.299600  | 6.236870  | 0.592160  |
| O | -2.815600 | -4.803940 | 0.475520  |
| H | -1.918300 | -5.148900 | 0.258310  |
| H | -2.924160 | -5.058770 | 1.402730  |

35

G92C1W2 HB

|   |            |            |            |
|---|------------|------------|------------|
| N | -1.0069700 | 2.2129089  | -0.2048508 |
| C | 0.3243142  | 2.0012068  | -0.0667642 |
| N | 0.9874503  | 0.8057166  | -0.0674928 |
| H | 0.5204480  | -0.1237395 | -0.1410624 |
| C | 2.3176175  | 1.1058369  | 0.1064600  |
| H | 3.0668806  | 0.3145880  | 0.1468242  |
| N | 2.5812994  | 2.4097773  | 0.2148391  |
| C | 1.3272572  | 2.9825431  | 0.1073947  |
| C | 0.8455609  | 4.3080177  | 0.1334311  |
| O | 1.6828485  | 5.3459358  | 0.2923218  |
| H | 1.0999106  | 6.1259790  | 0.2763390  |
| N | -0.4554654 | 4.5651793  | -0.0072739 |
| C | -1.3098247 | 3.5184966  | -0.1659524 |
| N | -2.6593102 | 3.8623828  | -0.2427085 |
| H | -2.7767773 | 4.8231370  | -0.5567496 |
| H | -3.1886330 | 3.2099238  | -0.8168700 |
| N | -0.6378072 | -3.8422995 | 0.1696932  |
| C | -1.9918321 | -3.8707736 | 0.2801713  |
| H | -2.4395222 | -4.8575960 | 0.4297407  |
| C | -2.7302321 | -2.7191722 | 0.2046089  |
| H | -3.8179839 | -2.7353461 | 0.2878421  |
| C | -1.9921658 | -1.4984528 | 0.0019500  |
| N | -2.6433665 | -0.3209788 | -0.1111983 |
| H | -2.1096166 | 0.5618649  | -0.1442111 |
| H | -3.6233455 | -0.2847546 | 0.1394899  |
| N | -0.6607817 | -1.4874389 | -0.1129818 |
| C | 0.0638850  | -2.6508291 | -0.0287205 |
| O | 1.3036328  | -2.6461563 | -0.1169543 |
| H | -0.1006154 | -4.7328947 | 0.2458064  |
| O | 2.8906648  | -4.8436611 | -0.5307146 |
| H | 3.0617808  | -4.7575081 | -1.4779163 |
| H | 2.4243971  | -4.0021049 | -0.3237033 |
| O | 0.7507957  | -6.2372982 | 0.2953188  |
| H | 1.0290282  | -6.4934383 | 1.1854348  |
| H | 1.5924348  | -5.8904356 | -0.0911249 |

35

G92C2AW2 HB

|   |            |            |           |
|---|------------|------------|-----------|
| N | -1.8408387 | -0.2621694 | 3.4961997 |
| C | -0.6665222 | -0.1149611 | 4.1414138 |
| N | -0.4462603 | -0.1592884 | 5.4990109 |
| H | -1.1560085 | -0.2989820 | 6.2108293 |
| C | 0.9090514  | 0.0266697  | 5.6900695 |
| H | 1.3459479  | 0.0365801  | 6.6892134 |
| N | 1.5918764  | 0.1859533  | 4.5620389 |
| C | 0.6111853  | 0.0998710  | 3.5866705 |

|   |            |            |            |
|---|------------|------------|------------|
| C | 0.6502575  | 0.1712285  | 2.1721519  |
| O | 1.7844690  | 0.3483535  | 1.5238539  |
| H | 1.5972237  | 0.2829581  | 0.5308547  |
| N | -0.5056762 | 0.0546215  | 1.4950733  |
| C | -1.6749336 | -0.1572848 | 2.1732519  |
| N | -2.8106393 | -0.2059556 | 1.3807120  |
| H | -2.6476359 | -0.5489289 | 0.4366825  |
| H | -3.5908005 | -0.6592779 | 1.8486512  |
| N | 1.4230946  | 0.0801565  | -1.1405655 |
| C | 2.5333963  | -0.0999336 | -1.8995119 |
| H | 3.4850825  | -0.1139692 | -1.3557738 |
| C | 2.4975776  | -0.2512128 | -3.2734305 |
| H | 3.4122664  | -0.3886906 | -3.8547587 |
| C | 1.2150045  | -0.2180142 | -3.8917729 |
| N | 1.0537499  | -0.3799501 | -5.2245883 |
| H | 0.1410674  | -0.1562568 | -5.6549572 |
| H | 1.8785370  | -0.3097738 | -5.8078375 |
| N | 0.1009732  | -0.0598499 | -3.1440740 |
| C | 0.2590307  | 0.0873504  | -1.8188004 |
| O | -0.8715166 | 0.2713875  | -1.1422475 |
| H | -0.6522101 | 0.2659477  | -0.1515532 |
| O | -1.4769709 | 0.2418185  | -6.3882571 |
| H | -1.8886118 | -0.5559319 | -6.7473487 |
| H | -2.0062772 | 0.3818729  | -5.5691159 |
| O | -2.6410212 | 0.2022938  | -3.9321127 |
| H | -1.7492107 | -0.0150517 | -3.5817049 |
| H | -2.8508510 | 1.0033498  | -3.4329268 |

35

G92C2BW2 HB

|   |            |            |            |
|---|------------|------------|------------|
| N | 2.2602758  | -0.6407826 | 2.1048527  |
| C | 2.9143459  | -0.4329310 | 0.9520913  |
| N | 4.1566212  | -0.9105911 | 0.5891437  |
| H | 4.7749535  | -1.4619884 | 1.1761242  |
| C | 4.3692206  | -0.5363473 | -0.7199707 |
| H | 5.2810338  | -0.8079335 | -1.2526138 |
| N | 3.3653488  | 0.1652425  | -1.2403805 |
| C | 2.4570391  | 0.2470961  | -0.1946579 |
| C | 1.1728981  | 0.8201839  | -0.0772562 |
| O | 0.6205680  | 1.5193507  | -1.0690502 |
| H | -0.3714185 | 1.2782763  | -1.0379501 |
| N | 0.4867568  | 0.6459924  | 1.0587324  |
| C | 1.0306612  | -0.0911266 | 2.0822236  |
| N | 0.2523830  | -0.2294842 | 3.1987915  |
| H | -0.7685938 | -0.2261685 | 3.0861154  |
| H | 0.5994173  | -0.9370236 | 3.8394310  |
| N | -3.6515329 | -0.1233919 | 0.4243523  |
| C | -4.0623553 | -0.9628924 | -0.5573527 |
| H | -4.9950896 | -1.5048677 | -0.3611750 |
| C | -3.3680964 | -1.1753913 | -1.7390097 |
| H | -3.7279881 | -1.8806635 | -2.4921619 |
| C | -2.1533554 | -0.4607964 | -1.9120684 |
| N | -1.3765213 | -0.6005418 | -3.0135282 |
| H | -0.3994279 | -0.2764834 | -3.0329377 |
| H | -1.5973437 | -1.3650981 | -3.6402226 |
| N | -1.7704503 | 0.4308875  | -0.9686392 |
| C | -2.5219202 | 0.5398654  | 0.1489797  |
| O | -2.0904207 | 1.3959623  | 1.0825650  |
| H | -1.0861756 | 1.3063905  | 1.0850959  |
| O | 1.3690007  | 0.2754290  | -3.4973061 |
| H | 1.2179333  | 1.1494083  | -3.1054279 |
| H | 2.1436781  | 0.0123504  | -2.9671696 |
| O | -2.7291540 | -0.2627496 | 3.3005989  |
| H | -2.7542131 | 0.7041740  | 3.2499970  |
| H | -3.2041439 | -0.4640512 | 2.4733792  |

35

G19C1W2 ST

|   |            |            |            |
|---|------------|------------|------------|
| N | -1.2743017 | 0.8875049  | 2.6663432  |
| C | -2.4916059 | 0.5185607  | 2.1384572  |
| H | -3.4291980 | 0.9532596  | 2.4851504  |
| N | -2.3790006 | -0.4112767 | 1.1923748  |
| C | -1.0178317 | -0.6512066 | 1.1169478  |
| C | -0.2697150 | -1.5297027 | 0.2440580  |
| O | -0.6763699 | -2.2848071 | -0.6436026 |
| N | 1.1087596  | -1.4155167 | 0.5168228  |
| H | 1.7413371  | -1.8135772 | -0.1934889 |
| C | 1.6987035  | -0.5910274 | 1.4475482  |
| N | 3.0606644  | -0.7065164 | 1.5700061  |
| H | 3.5353366  | -1.0101695 | 0.7188424  |
| H | 3.4712449  | 0.1233891  | 1.9895831  |
| N | 1.0321799  | 0.2227134  | 2.2555972  |
| C | -0.3065568 | 0.1434543  | 2.0278350  |
| H | -1.1086763 | 1.5305105  | 3.4350478  |
| N | 0.6146108  | 2.2675939  | -0.3448568 |
| C | -0.7438722 | 2.3902603  | -0.4009041 |
| H | -1.1985097 | 3.1517550  | 0.2384570  |
| C | -1.4573530 | 1.5760659  | -1.2361558 |
| H | -2.5432302 | 1.6390585  | -1.3095225 |
| C | -0.7001148 | 0.6202937  | -2.0098850 |
| N | -1.3701380 | -0.1940042 | -2.8670645 |
| H | -0.7809496 | -0.9582039 | -3.1949438 |
| H | -2.2833142 | -0.5188829 | -2.5111170 |
| N | 0.6299966  | 0.5194010  | -1.9532776 |
| C | 1.3284201  | 1.3168830  | -1.0882805 |
| O | 2.5557680  | 1.2293096  | -0.9064351 |
| H | 1.1656959  | 2.8017649  | 0.3217454  |
| O | -3.3754382 | -1.4927791 | -1.3207479 |
| H | -2.6055748 | -2.0710018 | -1.1660208 |
| H | -3.3913581 | -1.0487697 | -0.4519198 |
| O | 3.2946778  | -1.3659690 | -1.2687061 |
| H | 3.0613736  | -0.4103940 | -1.3588490 |
| H | 3.2326672  | -1.7001858 | -2.1723194 |

35

G19C2AW2 ST

|   |            |            |            |
|---|------------|------------|------------|
| N | -2.7817011 | -1.7758434 | 1.0493946  |
| C | -3.6128388 | -0.7151314 | 0.7715963  |
| H | -4.5827910 | -0.5964734 | 1.2541954  |
| N | -3.1003807 | 0.1138788  | -0.1368272 |
| C | -1.8775133 | -0.4508498 | -0.4544025 |
| C | -0.8329328 | 0.0147370  | -1.3401177 |
| O | -0.7974610 | 1.0099109  | -2.0694413 |
| N | 0.2727174  | -0.8588358 | -1.2787531 |
| H | 1.1119039  | -0.5594568 | -1.7939237 |
| C | 0.3811187  | -1.9957898 | -0.5107147 |
| N | 1.5350848  | -2.7178907 | -0.6727547 |
| H | 2.3235845  | -2.2138587 | -1.0759341 |
| H | 1.7417495  | -3.3161552 | 0.1210582  |
| N | -0.5665721 | -2.4442415 | 0.2974592  |
| C | -1.6529400 | -1.6273881 | 0.2758697  |
| H | -2.9566409 | -2.5420102 | 1.6927091  |
| N | 1.8532414  | -0.3017721 | 1.7993969  |
| C | 0.5727178  | 0.0372651  | 2.1044115  |
| H | 0.0520518  | -0.6311004 | 2.7996886  |
| C | -0.0656218 | 1.1495233  | 1.5752756  |
| H | -1.0971747 | 1.4000650  | 1.8340722  |
| C | 0.6806329  | 1.9586567  | 0.6727928  |
| N | 0.1650963  | 3.1005146  | 0.1457386  |
| H | 0.7120141  | 3.4540438  | -0.6359997 |



|   |            |            |            |
|---|------------|------------|------------|
| H | -0.8542799 | 3.1178504  | -0.0134728 |
| N | 1.9545690  | 1.6356713  | 0.3490839  |
| C | 2.4303263  | 0.5407850  | 0.9415403  |
| O | 3.7164578  | 0.2283598  | 0.5734725  |
| H | 3.9201445  | -0.5626852 | 1.1032920  |
| O | 3.0460010  | -0.5734294 | -2.0312452 |
| H | 3.4183964  | -0.1783812 | -2.8298985 |
| H | 3.4404510  | -0.0606884 | -1.3000255 |
| O | -2.5288513 | 2.8794181  | -0.8100030 |
| H | -3.0332553 | 2.1246745  | -0.4540483 |
| H | -2.0647617 | 2.4148640  | -1.5309930 |

35

G19C2BW2 ST

|   |            |            |            |
|---|------------|------------|------------|
| N | 3.7202134  | 0.5376698  | -0.9223256 |
| C | 3.3984792  | 1.8369802  | -0.6066617 |
| H | 3.9936716  | 2.6821763  | -0.9516282 |
| N | 2.3053562  | 1.9253702  | 0.1485615  |
| C | 1.9094390  | 0.6101388  | 0.3245847  |
| C | 0.7801720  | 0.0590848  | 1.0419259  |
| O | -0.0986093 | 0.6309655  | 1.6921680  |
| N | 0.7632125  | -1.3450976 | 0.8958270  |
| H | -0.0786188 | -1.8237588 | 1.2378839  |
| C | 1.6675801  | -2.1158426 | 0.1960674  |
| N | 1.4608214  | -3.4699321 | 0.2457086  |
| H | 0.4861634  | -3.7563359 | 0.3690616  |
| H | 1.9743766  | -3.9651372 | -0.4775027 |
| N | 2.7191063  | -1.6288957 | -0.4456961 |
| C | 2.7735613  | -0.2737614 | -0.3400277 |
| H | 4.5054464  | 0.2168864  | -1.4808081 |
| N | -1.9101648 | -1.0410654 | -1.0755004 |
| C | -1.0171333 | -0.1061112 | -1.4960515 |
| H | -0.1634749 | -0.4839831 | -2.0720294 |
| C | -1.1400971 | 1.2441302  | -1.2115426 |
| H | -0.3897958 | 1.9710865  | -1.5277107 |
| C | -2.2650960 | 1.6394184  | -0.4390411 |
| N | -2.4592950 | 2.9453647  | -0.0928363 |
| H | -3.1791355 | 3.0482323  | 0.6200668  |
| H | -1.5773884 | 3.4238345  | 0.1485116  |
| N | -3.1894949 | 0.7341836  | -0.0550282 |
| C | -2.9355215 | -0.5357384 | -0.3829218 |
| O | -3.8217298 | -1.4614745 | 0.0679794  |
| H | -4.4759732 | -0.9381854 | 0.5619357  |
| O | 0.0429906  | 3.4691230  | 1.0790513  |
| H | 0.9189721  | 3.2897467  | 0.6905924  |
| H | -0.1004085 | 2.6105040  | 1.5193002  |
| O | -1.3686213 | -3.2496666 | 0.5292834  |
| H | -2.2430996 | -3.3782649 | 0.9210588  |
| H | -1.5745774 | -2.6455794 | -0.2238413 |

35

G17C1W2 ST

|   |            |            |            |
|---|------------|------------|------------|
| N | 0.1835490  | -2.1855712 | -1.0583427 |
| C | 0.1321908  | -1.9981560 | 0.3002368  |
| N | 0.9249390  | -2.6465189 | 1.2214874  |
| C | 0.5481159  | -2.1261977 | 2.3942813  |
| H | 0.9590787  | -2.4140495 | 3.3626538  |
| N | -0.4441863 | -1.1894641 | 2.2885010  |
| H | -0.8337963 | -0.5591255 | 3.0016555  |
| C | -0.7157506 | -1.0807952 | 0.9488009  |
| C | -1.5554118 | -0.1752913 | 0.2194332  |
| O | -2.2677763 | 0.7519347  | 0.6591903  |
| N | -1.4603471 | -0.4387056 | -1.1408599 |
| H | -1.8249234 | 0.2921772  | -1.7716813 |
| C | -0.6296940 | -1.3892394 | -1.7207911 |

|   |            |            |            |
|---|------------|------------|------------|
| N | -0.7635223 | -1.5134690 | -3.0878400 |
| H | -1.0229578 | -0.6467368 | -3.5595617 |
| H | 0.0617219  | -1.9503074 | -3.4915756 |
| N | 2.2431329  | 0.1745793  | -0.5883926 |
| C | 2.3851989  | 0.1904675  | 0.7656048  |
| H | 3.0719691  | -0.5419446 | 1.1958497  |
| C | 1.6685619  | 1.0935354  | 1.5055625  |
| H | 1.7679241  | 1.1490197  | 2.5901379  |
| C | 0.7643368  | 1.9441463  | 0.7773862  |
| N | 0.0127143  | 2.8610348  | 1.4661303  |
| H | -0.7489214 | 3.2163269  | 0.8893008  |
| H | -0.3160420 | 2.5371681  | 2.3774675  |
| N | 0.6336481  | 1.9205932  | -0.5467088 |
| C | 1.3598316  | 1.0144956  | -1.2783926 |
| O | 1.2534121  | 0.8845389  | -2.5087388 |
| H | 2.6667288  | -0.5659608 | -1.1437413 |
| O | -1.6454958 | 1.1136667  | 3.2557114  |
| H | -2.0130878 | 1.0450026  | 2.3340978  |
| H | -2.4268041 | 1.2628802  | 3.8053191  |
| O | -1.3111675 | 1.3764170  | -3.2838513 |
| H | -0.3550108 | 1.4192568  | -3.0403161 |
| H | -1.5916304 | 2.2998135  | -3.2689067 |

35

G17C2AW2 ST

|   |            |            |            |
|---|------------|------------|------------|
| N | -0.9171493 | -2.0464689 | 0.7475131  |
| C | 0.3548216  | -1.5812429 | 0.9877676  |
| N | 1.5059515  | -2.3273973 | 0.8691952  |
| C | 2.4834188  | -1.4523368 | 1.1353802  |
| H | 3.5473734  | -1.6912795 | 1.1357225  |
| N | 2.0334590  | -0.1931540 | 1.4267938  |
| H | 2.5434074  | 0.7073610  | 1.4951811  |
| C | 0.6695810  | -0.2497565 | 1.3229537  |
| C | -0.3389358 | 0.7660059  | 1.4594099  |
| O | -0.2173090 | 1.9815968  | 1.6936131  |
| N | -1.5931681 | 0.1911868  | 1.2623937  |
| H | -2.3806190 | 0.8449867  | 1.2170049  |
| C | -1.8379124 | -1.1173822 | 0.8804056  |
| N | -3.1783929 | -1.4161329 | 0.7078667  |
| H | -3.7002760 | -0.6589949 | 0.2602475  |
| H | -3.2886354 | -2.3107448 | 0.2363988  |
| N | 1.1479041  | 1.6340206  | -1.3867447 |
| C | 2.0783752  | 0.6769593  | -1.6342465 |
| H | 3.1261186  | 0.9934444  | -1.5687820 |
| C | 1.7511169  | -0.6364818 | -1.9316885 |
| H | 2.5183321  | -1.3938012 | -2.1049834 |
| C | 0.3737109  | -0.9647828 | -1.9482131 |
| N | -0.0490149 | -2.2529199 | -2.1782922 |
| H | -0.9811642 | -2.4035192 | -1.7932240 |
| H | 0.5983057  | -2.9453623 | -1.8009836 |
| N | -0.5741877 | -0.0198925 | -1.7775863 |
| C | -0.1141037 | 1.2040471  | -1.5032271 |
| O | -1.0941362 | 2.1294913  | -1.2923229 |
| H | -0.6370514 | 2.8963061  | -0.9038708 |
| O | -3.6837131 | 1.3439429  | -0.2437740 |
| H | -2.9085041 | 1.5717073  | -0.7899915 |
| H | -4.2581864 | 2.1152631  | -0.3287980 |
| O | 2.4752845  | 2.5149566  | 1.2441310  |
| H | 2.2292425  | 2.5669837  | 0.3042185  |
| H | 1.5781296  | 2.5408073  | 1.6377650  |

35

G17C2BW2 ST

|   |            |           |            |
|---|------------|-----------|------------|
| N | -1.2852010 | 1.7899480 | 0.4175850  |
| C | -2.0876883 | 0.8398434 | -0.1618594 |

|   |            |            |            |
|---|------------|------------|------------|
| N | -3.3338611 | 0.4661176  | 0.3025469  |
| C | -3.7109665 | -0.5186463 | -0.5178027 |
| H | -4.6668706 | -1.0410765 | -0.4733629 |
| N | -2.7725421 | -0.8064595 | -1.4767657 |
| H | -2.8265881 | -1.5071237 | -2.2103786 |
| C | -1.7252380 | 0.0519543  | -1.2662726 |
| C | -0.3804098 | 0.0211344  | -1.7738696 |
| O | 0.0906933  | -0.7720918 | -2.6011893 |
| N | 0.3698249  | 1.0117533  | -1.1410346 |
| H | 1.3906489  | 1.0286096  | -1.3014102 |
| C | -0.0849302 | 1.8375099  | -0.1230930 |
| N | 0.8238368  | 2.7892865  | 0.2696576  |
| H | 1.7950205  | 2.6025325  | 0.0242096  |
| H | 0.6495042  | 3.1609092  | 1.1976539  |
| N | 1.7190326  | -1.5777846 | 0.4856459  |
| C | 0.4843484  | -2.1158726 | 0.3247546  |
| H | 0.3966870  | -2.8853339 | -0.4503541 |
| C | -0.6260805 | -1.7180123 | 1.0587486  |
| H | -1.6084498 | -2.1712312 | 0.9038754  |
| C | -0.4332166 | -0.6862598 | 2.0110812  |
| N | -1.4587225 | -0.2121983 | 2.7875155  |
| H | -1.2410840 | 0.7027393  | 3.1791834  |
| H | -2.3641422 | -0.2011548 | 2.3134822  |
| N | 0.7938065  | -0.1589097 | 2.2093220  |
| C | 1.7728933  | -0.6417709 | 1.4363018  |
| O | 3.0039197  | -0.0886220 | 1.6307883  |
| H | 2.8722235  | 0.5272440  | 2.3731037  |
| O | 2.9136242  | -1.0777652 | -2.2010278 |
| H | 2.7350143  | -1.4730423 | -1.3269289 |
| H | 2.0106230  | -1.0415099 | -2.5715005 |
| O | 3.2230186  | 1.3041372  | -0.9429854 |
| H | 3.3097751  | 0.5526435  | -1.5771873 |
| H | 3.4254462  | 0.8494661  | -0.1073353 |

35

G91C1W2 ST

|   |            |            |            |
|---|------------|------------|------------|
| N | 0.6201241  | -0.3139620 | -2.1866587 |
| C | 1.1868511  | -0.0655923 | -1.0011548 |
| N | 1.9862844  | -0.8997248 | -0.2548559 |
| H | 2.1051867  | -1.9268451 | -0.3869372 |
| C | 2.2721713  | -0.2332996 | 0.9037063  |
| H | 2.8611347  | -0.6897291 | 1.6853990  |
| N | 1.7551392  | 0.9789478  | 0.9564971  |
| C | 1.0550637  | 1.1059216  | -0.2399666 |
| C | 0.1947097  | 2.0897887  | -0.7648153 |
| O | -0.1339484 | 3.2258159  | -0.1355629 |
| H | 0.1897813  | 3.2055842  | 0.8049813  |
| N | -0.3803804 | 1.8864635  | -1.9465003 |
| C | -0.1398010 | 0.7182976  | -2.5873192 |
| N | -0.8370357 | 0.5457596  | -3.7669242 |
| H | -1.1526446 | 1.4023940  | -4.2015563 |
| H | -0.4537878 | -0.1499427 | -4.3927666 |
| N | -1.9571380 | -1.2848448 | -0.3643104 |
| C | -2.3612390 | -0.0413621 | -0.0009669 |
| H | -2.9611540 | 0.5082173  | -0.7159840 |
| C | -1.9815289 | 0.4663432  | 1.2010678  |
| H | -2.2733837 | 1.4623052  | 1.5050559  |
| C | -1.1187720 | -0.3530244 | 1.9953029  |
| N | -0.6838576 | 0.1034252  | 3.2010418  |
| H | 0.0508290  | -0.4503224 | 3.6228841  |
| H | -0.6069389 | 1.1074149  | 3.3287036  |
| N | -0.7142368 | -1.5695140 | 1.6296147  |
| C | -1.1090834 | -2.0789118 | 0.4351114  |
| O | -0.7572678 | -3.1815383 | -0.0169973 |
| H | -2.1475039 | -1.6441416 | -1.2920711 |

|   |           |            |            |
|---|-----------|------------|------------|
| O | 0.6390519 | 2.8360192  | 2.4921989  |
| H | 1.2515201 | 2.1292797  | 2.1069265  |
| H | 1.2078426 | 3.4880311  | 2.9251593  |
| O | 1.8810514 | -3.6433440 | -0.1594737 |
| H | 1.9599065 | -4.2118302 | -0.9382039 |
| H | 0.8992669 | -3.5910707 | 0.0114118  |

35

G91C2AW2 ST

|   |            |            |            |
|---|------------|------------|------------|
| N | -0.5889437 | -0.9951154 | 2.5451226  |
| C | -1.1083656 | -1.0048108 | 1.3077011  |
| N | -1.6242530 | -2.0847927 | 0.6241678  |
| H | -1.6183851 | -3.0462143 | 0.9497533  |
| C | -2.0243656 | -1.6317428 | -0.6068214 |
| H | -2.4550807 | -2.2945792 | -1.3577294 |
| N | -1.8342423 | -0.3223523 | -0.7724859 |
| C | -1.2537118 | 0.0829998  | 0.4214329  |
| C | -0.8231859 | 1.3384305  | 0.9314040  |
| O | -0.9153096 | 2.4992488  | 0.2858160  |
| H | -0.9776907 | 2.3662421  | -0.6989142 |
| N | -0.2962635 | 1.3934063  | 2.1559386  |
| C | -0.1900139 | 0.2456064  | 2.8767628  |
| N | 0.4821734  | 0.3784663  | 4.0841302  |
| H | 0.4090052  | 1.3176375  | 4.4676277  |
| H | 0.2431230  | -0.3525451 | 4.7495955  |
| N | 1.4500746  | -2.0618112 | -0.3841538 |
| C | 1.9667957  | -1.3613118 | 0.6574875  |
| H | 2.2061715  | -1.9383685 | 1.5576242  |
| C | 2.1709099  | 0.0115547  | 0.6242727  |
| H | 2.5669995  | 0.5477857  | 1.4899206  |
| C | 1.7980810  | 0.6874565  | -0.5656932 |
| N | 1.9531202  | 2.0428548  | -0.7196503 |
| H | 1.3318833  | 2.4202300  | -1.4402611 |
| H | 1.8945424  | 2.5647891  | 0.1523040  |
| N | 1.3021086  | 0.0116470  | -1.6229904 |
| C | 1.1694244  | -1.3054694 | -1.4493871 |
| O | 0.6496167  | -1.9485562 | -2.5330801 |
| H | 0.6332362  | -2.8839799 | -2.2690459 |
| O | -0.5439087 | 2.5668926  | -2.3210437 |
| H | -1.0283723 | 3.2478505  | -2.8076365 |
| H | -0.7073623 | 1.7393490  | -2.8560082 |
| O | -1.2364990 | 0.3005313  | -3.4941188 |
| H | -1.6156835 | 0.0895578  | -2.6143877 |
| H | -0.4537501 | -0.2745641 | -3.4890611 |

35

G91C2BW2 ST

|   |            |            |            |
|---|------------|------------|------------|
| N | 0.7086847  | 2.1196361  | 0.1528314  |
| C | 1.2030148  | 0.8701370  | 0.1287900  |
| N | 1.8503437  | 0.2053614  | 1.1467834  |
| H | 1.8315443  | 0.4996748  | 2.1474204  |
| C | 2.1246742  | -1.0497181 | 0.6784506  |
| H | 2.6238538  | -1.7976991 | 1.2948998  |
| N | 1.7429979  | -1.2487853 | -0.5873613 |
| C | 1.1445305  | -0.0485085 | -0.9407262 |
| C | 0.4495740  | 0.4019836  | -2.0952784 |
| O | 0.2381384  | -0.3395059 | -3.1915342 |
| H | 0.4953696  | -1.2776465 | -2.9987403 |
| N | -0.0631741 | 1.6304418  | -2.1088870 |
| C | 0.0897677  | 2.4105458  | -1.0028974 |
| N | -0.5642503 | 3.6353531  | -1.0625764 |
| H | -0.6695391 | 3.9724495  | -2.0163975 |
| H | -0.1566902 | 4.3236738  | -0.4339134 |
| N | -1.2079797 | 0.2824353  | 2.1911055  |
| C | -1.8600170 | 0.9255455  | 1.1896480  |

|   |            |            |            |
|---|------------|------------|------------|
| H | -2.1189107 | 1.9731192  | 1.3761072  |
| C | -2.1665866 | 0.3306963  | -0.0274079 |
| H | -2.6703700 | 0.8886112  | -0.8198795 |
| C | -1.7395543 | -1.0066972 | -0.2135520 |
| N | -1.9600760 | -1.6915141 | -1.3814062 |
| H | -1.3150329 | -2.4680712 | -1.5329333 |
| H | -2.0543248 | -1.1025772 | -2.2057780 |
| N | -1.1226483 | -1.6791638 | 0.7815838  |
| C | -0.9017997 | -0.9862471 | 1.9032797  |
| O | -0.2476744 | -1.6563051 | 2.8926094  |
| H | -0.1223567 | -2.5474527 | 2.5229497  |
| O | 1.1553652  | 0.8195771  | 3.7496853  |
| H | 1.0511951  | -0.0607524 | 4.1417219  |
| H | 0.2508733  | 0.9399599  | 3.3886949  |
| O | 0.6618457  | -2.8894363 | -2.4243319 |
| H | 1.2517058  | -3.4854516 | -2.9054970 |
| H | 1.2088934  | -2.5560027 | -1.6658837 |

35

G92C1W2 ST

|   |            |            |            |
|---|------------|------------|------------|
| N | 1.2472962  | -0.3551937 | -1.0800658 |
| C | -0.0894952 | -0.4601673 | -1.2388515 |
| N | -0.9453209 | 0.4579517  | -1.7890659 |
| H | -0.6968362 | 1.4552837  | -1.9430002 |
| C | -2.2081050 | -0.0725085 | -1.6499386 |
| H | -3.0892923 | 0.4827881  | -1.9716222 |
| N | -2.2422213 | -1.2881999 | -1.0999472 |
| C | -0.9081728 | -1.5386474 | -0.8342084 |
| C | -0.2141694 | -2.5943203 | -0.2065876 |
| O | -0.8694336 | -3.6815184 | 0.2360922  |
| H | -0.1710108 | -4.2452520 | 0.6150326  |
| N | 1.1029904  | -2.5279623 | -0.0122602 |
| C | 1.7577774  | -1.4134060 | -0.4354960 |
| N | 3.1058781  | -1.3406441 | -0.0753039 |
| H | 3.5181040  | -2.2663720 | 0.0280154  |
| H | 3.6419579  | -0.7543493 | -0.7146464 |
| N | -1.8634673 | 0.4555295  | 1.6079037  |
| C | -1.0250426 | -0.4316720 | 2.2108924  |
| H | -1.4829259 | -1.3259231 | 2.6431358  |
| C | 0.3206489  | -0.1836908 | 2.2431544  |
| H | 1.0136435  | -0.8764030 | 2.7224312  |
| C | 0.7794866  | 1.0019977  | 1.5632178  |
| N | 2.1088459  | 1.2871980  | 1.5388855  |
| H | 2.3891005  | 1.8856624  | 0.7479956  |
| H | 2.7111440  | 0.4718985  | 1.6426438  |
| N | -0.0559633 | 1.8539737  | 0.9637685  |
| C | -1.4176821 | 1.6190195  | 0.9528035  |
| O | -2.2302107 | 2.3448850  | 0.3792911  |
| H | -2.8527777 | 0.2453190  | 1.4995931  |
| O | 2.6892683  | 2.2251203  | -1.1283285 |
| H | 2.0552594  | 2.8749121  | -1.4731091 |
| H | 2.2217991  | 1.3870524  | -1.3144062 |
| O | -0.0252009 | 3.0812151  | -1.5204700 |
| H | 0.1002009  | 2.7855170  | -0.5818321 |
| H | -0.7960829 | 3.6597327  | -1.4147235 |

35

G92C2AW2 ST

|   |            |           |            |
|---|------------|-----------|------------|
| N | 0.5507038  | 2.2148207 | -1.3076243 |
| C | 0.0211260  | 2.0591536 | -0.0831216 |
| N | 0.2948584  | 2.7981804 | 1.0466257  |
| H | 0.9664133  | 3.5570411 | 1.1083126  |
| C | -0.4413144 | 2.2612652 | 2.0740513  |
| H | -0.4010040 | 2.6649987 | 3.0858866  |
| N | -1.2004636 | 1.2357773 | 1.6946132  |

|   |            |            |            |
|---|------------|------------|------------|
| C | -0.9147657 | 1.0950810  | 0.3436732  |
| C | -1.3657814 | 0.1952412  | -0.6606999 |
| O | -2.2284337 | -0.7918760 | -0.4780150 |
| H | -2.3659145 | -0.9481996 | 0.5193207  |
| N | -0.8801212 | 0.3398751  | -1.8993811 |
| C | 0.0517499  | 1.3029551  | -2.1578413 |
| N | 0.4936543  | 1.3435874  | -3.4681089 |
| H | 0.4722159  | 0.4302096  | -3.9216799 |
| H | 1.3811055  | 1.8300627  | -3.5634645 |
| N | 1.9717557  | -0.0344156 | 1.5844856  |
| C | 2.3064331  | -0.1185452 | 0.2719621  |
| H | 3.0524719  | 0.6027249  | -0.0817181 |
| C | 1.7519201  | -1.0432346 | -0.6010863 |
| H | 2.0325530  | -1.0870514 | -1.6560470 |
| C | 0.7662978  | -1.9157195 | -0.0698077 |
| N | 0.1776903  | -2.8756753 | -0.8415073 |
| H | -0.6940851 | -3.2281070 | -0.4541031 |
| H | 0.1396621  | -2.6693709 | -1.8449937 |
| N | 0.4082404  | -1.8462909 | 1.2314013  |
| C | 1.0461828  | -0.9209072 | 1.9627207  |
| O | 0.6598722  | -0.8919579 | 3.2600168  |
| H | 1.1825662  | -0.1676113 | 3.6435736  |
| O | -2.3465757 | -1.2983996 | 2.0470827  |
| H | -1.4927977 | -1.7740780 | 2.0609494  |
| H | -2.0665937 | -0.4062436 | 2.3393027  |
| O | -0.1408750 | -1.7133306 | -3.5506308 |
| H | -0.6583154 | -1.0660441 | -3.0082103 |
| H | -0.7992117 | -2.0768298 | -4.1585270 |

35

G92C2BW2 ST

|   |            |            |            |
|---|------------|------------|------------|
| N | 1.5513672  | -0.3270643 | 0.2798466  |
| C | 0.7385750  | -1.3945020 | 0.4142004  |
| N | 0.4070564  | -2.0883967 | 1.5507837  |
| H | 0.5595592  | -1.7495413 | 2.5269448  |
| C | -0.5032590 | -3.0453731 | 1.1642159  |
| H | -0.9446575 | -3.7292179 | 1.8903659  |
| N | -0.7681053 | -3.0630587 | -0.1461898 |
| C | 0.0122190  | -2.0253660 | -0.6155513 |
| C | 0.1316856  | -1.4429006 | -1.8874295 |
| O | -0.5643484 | -1.8831979 | -2.9602538 |
| H | -1.0778609 | -2.6464457 | -2.6395508 |
| N | 0.9155217  | -0.3858843 | -2.0740571 |
| C | 1.5809848  | 0.1121556  | -0.9862205 |
| N | 2.3272657  | 1.2590514  | -1.2421486 |
| H | 2.7184560  | 1.2646354  | -2.1819167 |
| H | 3.0322782  | 1.4144836  | -0.5246788 |
| N | -1.1054196 | 0.6657208  | 2.0189063  |
| C | -1.7791635 | 0.3399268  | 0.8869171  |
| H | -2.4589289 | -0.5175343 | 0.9616541  |
| C | -1.6216665 | 1.0157243  | -0.3143203 |
| H | -2.1578316 | 0.7220473  | -1.2192627 |
| C | -0.7207834 | 2.1140635  | -0.3243891 |
| N | -0.5426440 | 2.8813833  | -1.4343107 |
| H | 0.3260978  | 3.4096745  | -1.4134459 |
| H | -0.7455381 | 2.4225762  | -2.3301714 |
| N | -0.0440052 | 2.4575732  | 0.7937449  |
| C | -0.2687663 | 1.6986284  | 1.8688484  |
| O | 0.4515107  | 2.0038016  | 2.9792879  |
| H | 1.0065311  | 2.7518629  | 2.7004211  |
| O | 0.2556824  | -0.8579510 | 3.9828347  |
| H | 0.8950945  | -0.1453963 | 4.1327392  |
| H | -0.4498585 | -0.3551547 | 3.5171785  |
| O | -0.6811864 | 1.2282384  | -3.8054770 |
| H | -1.3180252 | 0.5493477  | -4.0663173 |

H 0.0288049 0.6833184 -3.4076520

35

G19C1W2 TS

|   |            |            |            |
|---|------------|------------|------------|
| N | 1.2747370  | 3.8051043  | -1.3794147 |
| C | 2.4324763  | 3.4023641  | -0.7520660 |
| H | 3.4064986  | 3.8118814  | -1.0190026 |
| N | 2.2190643  | 2.4830828  | 0.1854433  |
| C | 0.8490730  | 2.2901204  | 0.1553690  |
| C | 0.0100678  | 1.4037340  | 0.9200845  |
| O | 0.3193678  | 0.5895438  | 1.8092563  |
| N | -1.3247889 | 1.5262823  | 0.5228226  |
| H | -2.0089624 | 0.8799846  | 0.9622033  |
| C | -1.8136943 | 2.3482271  | -0.4667393 |
| N | -3.1729958 | 2.2991970  | -0.6432829 |
| H | -3.6170344 | 1.4301526  | -0.3424585 |
| H | -3.4738859 | 2.6667180  | -1.5406157 |
| N | -1.0709222 | 3.1795836  | -1.1812633 |
| C | 0.2369443  | 3.0998037  | -0.8170171 |
| H | 1.1856529  | 4.4878439  | -2.1258935 |
| N | 0.0912648  | -1.9457724 | 0.6156090  |
| C | 1.4016114  | -2.1543365 | 0.3082016  |
| H | 2.1165815  | -1.4202218 | 0.7030256  |
| C | 1.7400316  | -3.2394612 | -0.4589242 |
| H | 2.7768614  | -3.4346016 | -0.7369691 |
| C | 0.6583285  | -4.0890140 | -0.8685405 |
| N | 0.9246617  | -5.1743798 | -1.6714972 |
| H | 0.1570666  | -5.8399500 | -1.7155615 |
| H | 1.8455378  | -5.5906742 | -1.5807748 |
| N | -0.6175996 | -3.8725922 | -0.5706395 |
| C | -0.9506215 | -2.7662918 | 0.1713625  |
| O | -2.1272248 | -2.4870353 | 0.4622210  |
| H | -0.1345802 | -1.1319714 | 1.2002820  |
| O | 3.1836649  | 0.1475931  | 1.7442237  |
| H | 3.2010018  | 0.9355640  | 1.1729324  |
| H | 2.3062412  | 0.2762361  | 2.1407315  |
| O | -3.3943542 | -0.2080915 | 0.9715905  |
| H | -3.8566266 | -0.4037129 | 1.7977364  |
| H | -2.9545558 | -1.0730027 | 0.7514806  |

35

G19C2AW2 TS

|   |            |            |            |
|---|------------|------------|------------|
| N | -1.8091781 | -1.8215462 | -1.0397056 |
| C | -1.7520715 | -1.2918891 | -2.3072535 |
| H | -2.6075244 | -1.3133102 | -2.9823968 |
| N | -0.5555396 | -0.7822146 | -2.6006816 |
| C | 0.1820900  | -0.9858603 | -1.4493420 |
| C | 1.5480708  | -0.6267993 | -1.1400933 |
| O | 2.4088069  | -0.0839872 | -1.8371907 |
| N | 1.8326443  | -0.9691252 | 0.1993520  |
| H | 2.7253126  | -0.6122333 | 0.5451667  |
| C | 0.9705226  | -1.5257120 | 1.1177255  |
| N | 1.4798212  | -1.6930495 | 2.3887097  |
| H | 2.0759649  | -0.9023652 | 2.6523841  |
| H | 0.7092815  | -1.7976552 | 3.0475571  |
| N | -0.2557552 | -1.9253737 | 0.8293247  |
| C | -0.5819273 | -1.6207038 | -0.4563984 |
| H | -2.6188151 | -2.2207946 | -0.5736498 |
| N | -2.4474745 | 0.5785079  | 1.3857474  |
| C | -2.5642246 | 1.0894483  | 0.1325571  |
| H | -3.5573904 | 1.0105815  | -0.3264486 |
| C | -1.5154325 | 1.6746615  | -0.5581881 |
| H | -1.6315171 | 2.0695928  | -1.5692694 |
| C | -0.2647636 | 1.7476688  | 0.1139261  |
| N | 0.8174023  | 2.3295898  | -0.4683612 |

|   |            |            |            |
|---|------------|------------|------------|
| H | 1.7036216  | 2.1148226  | -0.0140600 |
| H | 0.8298347  | 2.2894346  | -1.4993591 |
| N | -0.1386859 | 1.2810765  | 1.3791966  |
| C | -1.2311008 | 0.7158286  | 1.9145142  |
| O | -1.0433946 | 0.2243384  | 3.1635222  |
| H | -1.9108917 | -0.1520288 | 3.3927373  |
| O | 2.5650697  | 1.0340052  | 2.0828040  |
| H | 1.5910475  | 1.1930258  | 2.0128270  |
| H | 2.8684679  | 1.7258886  | 2.6851911  |
| O | 0.8019044  | 1.7201267  | -3.3032812 |
| H | 0.1473039  | 1.0013270  | -3.3803750 |
| H | 1.5907467  | 1.1786815  | -3.1149479 |

35

G19C2BW2 TS

|   |            |            |            |
|---|------------|------------|------------|
| N | -2.8624043 | -1.8967814 | 1.2357671  |
| C | -3.6549006 | -0.8439025 | 0.8423261  |
| H | -4.6381754 | -0.6647580 | 1.2763428  |
| N | -3.0853981 | -0.0973186 | -0.1014128 |
| C | -1.8612721 | -0.7047263 | -0.3165770 |
| C | -0.8046733 | -0.3744945 | -1.2478445 |
| O | -0.7409873 | 0.5242630  | -2.0888693 |
| N | 0.2635638  | -1.2883275 | -1.0957401 |
| H | 1.0834001  | -1.0902623 | -1.6754396 |
| C | 0.3318705  | -2.3458506 | -0.2161592 |
| N | 1.4709469  | -3.1220736 | -0.2938280 |
| H | 2.3409692  | -2.5886801 | -0.3662344 |
| H | 1.5021260  | -3.7717203 | 0.4899619  |
| N | -0.6400934 | -2.6793591 | 0.6137577  |
| C | -1.6993298 | -1.8297112 | 0.5051218  |
| H | -3.0786795 | -2.6006141 | 1.9352932  |
| N | 2.8716026  | 0.2926213  | -1.0507569 |
| C | 2.1203854  | 1.3993425  | -1.2999318 |
| H | 2.0667848  | 1.7143369  | -2.3477359 |
| C | 1.4210159  | 2.0914367  | -0.3248027 |
| H | 0.7877985  | 2.9494246  | -0.5527698 |
| C | 1.4998418  | 1.5904197  | 1.0016545  |
| N | 0.8466426  | 2.1980620  | 2.0239009  |
| H | 0.7887062  | 1.6594557  | 2.8818551  |
| H | 0.0496510  | 2.7952798  | 1.7649086  |
| N | 2.2628855  | 0.5074931  | 1.2837796  |
| C | 2.8894714  | -0.0455778 | 0.2398073  |
| O | 3.6342929  | -1.1564360 | 0.5272951  |
| H | 3.5529139  | -1.2399322 | 1.4936945  |
| O | -2.5588977 | 2.5205526  | -1.1980920 |
| H | -3.0817633 | 1.7833532  | -0.8291544 |
| H | -1.9104958 | 2.0042579  | -1.7138913 |
| O | -1.2809767 | 3.6836673  | 0.8881879  |
| H | -1.7574200 | 3.2383348  | 0.1425496  |
| H | -1.2407162 | 4.6010348  | 0.5904233  |

35

G17C1W2 TS

|   |            |            |            |
|---|------------|------------|------------|
| N | 0.4545570  | -0.9315427 | 2.0777910  |
| C | -0.2444296 | 0.2464345  | 1.9477992  |
| N | -1.4963227 | 0.4835239  | 2.4759767  |
| C | -1.8176155 | 1.6965251  | 2.0207181  |
| H | -2.7413449 | 2.2287617  | 2.2485182  |
| N | -0.8434468 | 2.2496959  | 1.2269137  |
| H | -0.8463535 | 3.1603789  | 0.7780484  |
| C | 0.1758869  | 1.3357967  | 1.1715982  |
| C | 1.3934451  | 1.3220143  | 0.4081153  |
| O | 1.8241084  | 2.1954614  | -0.3562023 |
| N | 2.0705803  | 0.1282478  | 0.6623312  |
| H | 2.9346521  | -0.0577028 | 0.1297242  |



|   |            |            |            |
|---|------------|------------|------------|
| C | 1.5851585  | -0.9338351 | 1.3987916  |
| N | 2.4289154  | -2.0222631 | 1.4401015  |
| H | 3.0113956  | -2.1276497 | 0.6069765  |
| H | 1.9502000  | -2.8683127 | 1.7353843  |
| N | -2.2724589 | 0.2492794  | -2.3786688 |
| C | -3.4236652 | -0.0936212 | -1.7362841 |
| H | -4.3592895 | 0.2849493  | -2.1572134 |
| C | -3.3560852 | -0.8811218 | -0.6210583 |
| H | -4.2561321 | -1.1829341 | -0.0834382 |
| C | -2.0375657 | -1.2963834 | -0.2009485 |
| N | -1.9308318 | -2.1322788 | 0.8732249  |
| H | -1.0075742 | -2.0897762 | 1.3221879  |
| H | -2.6834675 | -2.0404558 | 1.5512095  |
| N | -0.9160678 | -0.9499197 | -0.8323343 |
| C | -0.9911587 | -0.1629965 | -1.9565730 |
| O | -0.0243925 | 0.2174829  | -2.6249786 |
| H | -2.2856349 | 0.8246411  | -3.2166500 |
| O | 2.7315559  | 0.5532652  | -2.5192156 |
| H | 2.6209002  | 1.3238921  | -1.9310252 |
| H | 1.7942484  | 0.2871659  | -2.6226935 |
| O | 4.0360618  | -1.0990644 | -0.9112428 |
| H | 3.5900258  | -0.5865742 | -1.6409304 |
| H | 4.9621646  | -0.8345646 | -0.9885742 |

35

G17C2AW2 TS

|   |            |            |            |
|---|------------|------------|------------|
| N | 0.7200092  | -2.1262509 | 0.7593068  |
| C | 0.8564069  | -1.6312678 | -0.5158929 |
| N | 0.5960342  | -2.3345353 | -1.6702504 |
| C | 0.8148364  | -1.4431204 | -2.6455639 |
| H | 0.7147377  | -1.6522334 | -3.7110783 |
| N | 1.1984515  | -0.2122661 | -2.1903976 |
| H | 1.3570406  | 0.6802707  | -2.6929416 |
| C | 1.2201746  | -0.3068333 | -0.8251779 |
| C | 1.4508456  | 0.6808768  | 0.1927447  |
| O | 1.6785496  | 1.8990536  | 0.0744695  |
| N | 1.3645126  | 0.0765709  | 1.4454917  |
| H | 1.4025147  | 0.7071143  | 2.2530879  |
| C | 0.9741976  | -1.2318390 | 1.6890255  |
| N | 0.9372248  | -1.5757109 | 3.0278455  |
| H | 0.5946417  | -0.8219242 | 3.6276720  |
| H | 0.4364287  | -2.4515640 | 3.1578098  |
| N | -1.5074090 | 1.8599524  | -0.7417545 |
| C | -1.8006023 | 1.0399807  | -1.7783454 |
| H | -1.7986374 | 1.5028703  | -2.7719591 |
| C | -2.0694317 | -0.3131282 | -1.6160919 |
| H | -2.2936530 | -0.9603993 | -2.4667587 |
| C | -2.0047447 | -0.8283047 | -0.2990107 |
| N | -2.2317061 | -2.1630097 | -0.0391972 |
| H | -1.7833230 | -2.4370403 | 0.8354464  |
| H | -1.8906950 | -2.7599574 | -0.7939432 |
| N | -1.7552328 | -0.0246960 | 0.7577404  |
| C | -1.5226678 | 1.2532295  | 0.4475467  |
| O | -1.2354340 | 2.0551807  | 1.5186299  |
| H | -0.9516159 | 2.8923169  | 1.1086647  |
| O | 0.2118583  | 1.1609856  | 3.7961438  |
| H | -0.4541742 | 1.4417830  | 3.1392572  |
| H | 0.2313642  | 1.8864928  | 4.4326339  |
| O | 1.5337633  | 2.4561196  | -2.6558289 |
| H | 1.4852152  | 2.4616488  | -1.6731365 |
| H | 2.4290155  | 2.7862930  | -2.8139132 |

35

G17C2BW2 TS

|   |            |            |           |
|---|------------|------------|-----------|
| N | -0.2172747 | -1.8239975 | 1.4250702 |
|---|------------|------------|-----------|

|   |             |            |            |
|---|-------------|------------|------------|
| C | -0.3497235  | -0.7694108 | 2.2907692  |
| N | 0.2027119   | -0.7048796 | 3.5548408  |
| C | -0.1083342  | 0.5188047  | 3.9862566  |
| H | 0.1420472   | 0.9216306  | 4.9681302  |
| N | -0.8178680  | 1.2532087  | 3.0651399  |
| H | -1.1727876  | 2.2000208  | 3.1608104  |
| C | -0.9988112  | 0.4372026  | 1.9789193  |
| C | -1.5306869  | 0.7074766  | 0.6756337  |
| O | -1.9487486  | 1.7912306  | 0.2337508  |
| N | -1.4855720  | -0.4554308 | -0.0911553 |
| H | -1.8229314  | -0.4001851 | -1.0679762 |
| C | -0.86150263 | -1.6184642 | 0.2673622  |
| N | -0.8631326  | -2.6180189 | -0.6741914 |
| H | -1.0120503  | -2.3099054 | -1.6366298 |
| H | -0.1546774  | -3.3295760 | -0.5247831 |
| N | 1.3120987   | 0.1911860  | -2.3946290 |
| C | 2.2498682   | -0.6701193 | -1.9327903 |
| H | 2.6728283   | -1.3592847 | -2.6728999 |
| C | 2.6648713   | -0.7077048 | -0.6087526 |
| H | 3.4145959   | -1.4221402 | -0.2613507 |
| C | 2.0820776   | 0.2438320  | 0.2630280  |
| N | 2.4776467   | 0.3668523  | 1.5743064  |
| H | 1.8177276   | 0.9116871  | 2.1261048  |
| H | 2.7106402   | -0.5106957 | 2.0348667  |
| N | 1.1640944   | 1.1247728  | -0.1777181 |
| C | 0.8097014   | 1.0206171  | -1.4672940 |
| O | -0.1809827  | 1.8229664  | -1.9061602 |
| H | -0.7009670  | 2.1053039  | -1.1164556 |
| O | -1.9477624  | -1.0000406 | -2.8083719 |
| H | -2.7972889  | -1.2021408 | -3.2221460 |
| H | -1.4788038  | -0.4431939 | -3.4869805 |
| O | -0.5511865  | 0.5429184  | -4.4946834 |
| H | -0.7628606  | 1.4095533  | -4.1152155 |
| H | 0.2700455   | 0.3508498  | -3.9890554 |

35

G91C1W2 TS

|   |            |            |            |
|---|------------|------------|------------|
| N | -0.9272188 | 1.2593912  | 0.3705576  |
| C | 0.4093121  | 1.1451760  | 0.4964865  |
| N | 1.3926375  | 1.4647440  | -0.4079538 |
| H | 1.2315447  | 1.7330743  | -1.4024023 |
| C | 2.5836860  | 1.1021434  | 0.1792962  |
| H | 3.5357355  | 1.2539960  | -0.3317848 |
| N | 2.4617979  | 0.6007814  | 1.4128710  |
| C | 1.0953605  | 0.6271115  | 1.6099013  |
| C | 0.2820331  | 0.1592491  | 2.6626455  |
| O | 0.8055942  | -0.3973468 | 3.7750032  |
| H | 1.7707369  | -0.3302255 | 3.6657359  |
| N | -1.0408468 | 0.2079047  | 2.5689414  |
| C | -1.5772702 | 0.7460715  | 1.4328284  |
| N | -2.9588570 | 0.7778604  | 1.3831881  |
| H | -3.3771778 | 0.1614026  | 2.0751950  |
| H | -3.3121776 | 0.6121235  | 0.4405433  |
| N | -0.9321377 | -1.9780113 | 0.1285959  |
| C | 0.3575028  | -2.3170307 | 0.4074866  |
| H | 0.5401363  | -2.8075793 | 1.3678480  |
| C | 1.3449807  | -2.0326584 | -0.4981030 |
| H | 2.3859275  | -2.2897514 | -0.2976094 |
| C | 0.9322281  | -1.3295371 | -1.6857761 |
| N | 1.8598377  | -0.9948337 | -2.6357830 |
| H | 1.5659442  | -0.2028893 | -3.2132955 |
| H | 2.8236069  | -0.9560381 | -2.3194307 |
| N | -0.3259266 | -0.9899541 | -1.9412192 |
| C | -1.3165589 | -1.2912656 | -1.0388677 |
| O | -2.5020290 | -0.9743214 | -1.1919333 |

|   |            |            |            |
|---|------------|------------|------------|
| H | -1.6668469 | -2.1342973 | 0.8147059  |
| O | 0.7267004  | 1.7456085  | -3.0689012 |
| H | -0.2532120 | 1.6076254  | -2.9053187 |
| H | 0.7402723  | 2.5646010  | -3.5837649 |
| O | -1.8411342 | 1.6168093  | -2.3629989 |
| H | -2.1530078 | 0.6933715  | -2.3994682 |
| H | -1.6645258 | 1.6828991  | -1.4009377 |

35

G91C2AW2 TS

|   |            |            |           |
|---|------------|------------|-----------|
| N | 0.8639998  | -4.8459986 | 7.3139980 |
| C | 0.2229999  | -3.6559990 | 7.3899979 |
| N | 0.4449999  | -2.6879992 | 8.3219977 |
| H | 1.1419997  | -2.7769992 | 9.0409975 |
| C | -0.4379999 | -1.6739995 | 8.0409977 |
| H | -0.5069999 | -0.7579998 | 8.6159976 |
| N | -1.2079997 | -1.9229995 | 7.0159980 |
| C | -0.7699998 | -3.1829991 | 6.5799982 |
| C | -1.1379997 | -4.0839989 | 5.5329984 |
| O | -2.1189994 | -3.8429989 | 4.6329987 |
| H | -2.4889993 | -4.7069987 | 4.3599988 |
| N | -0.5309999 | -5.2879985 | 5.4109985 |
| C | 0.4089999  | -5.5689984 | 6.2969982 |
| N | 0.9559997  | -6.7369981 | 6.1639983 |
| H | 0.6259998  | -7.3069980 | 5.4109985 |
| H | 1.6769995  | -6.9769980 | 6.8139981 |
| N | -3.3889991 | -8.1179977 | 5.5109985 |
| C | -3.3739991 | -8.7279976 | 6.7249981 |
| H | -3.2899991 | -9.8069973 | 6.7789981 |
| C | -3.4589990 | -7.9819978 | 7.8469978 |
| H | -3.4409990 | -8.4719976 | 8.8049975 |
| C | -3.5689990 | -6.5709982 | 7.6919978 |
| N | -3.6349990 | -5.7969984 | 8.7489975 |
| H | -3.6739990 | -4.7949987 | 8.5799976 |
| H | -3.6119990 | -6.1819983 | 9.6689973 |
| N | -3.5999990 | -5.9679983 | 6.5229982 |
| C | -3.4909990 | -6.7659981 | 5.4639985 |
| O | -3.4729990 | -6.1359983 | 4.2869988 |
| H | -3.4369990 | -6.8539981 | 3.6519990 |
| O | -4.7399987 | -3.3759991 | 5.8239984 |
| H | -4.5509987 | -4.3349988 | 5.8259984 |
| H | -4.1559988 | -3.0729991 | 5.1099986 |
| O | -3.5749990 | -2.9909992 | 8.2309977 |
| H | -2.8119992 | -2.4869993 | 7.8739978 |
| H | -4.1619988 | -2.9789992 | 7.4369979 |

35

G91C2BW2 TS

|   |            |            |            |
|---|------------|------------|------------|
| N | 1.4876714  | 1.1107957  | -1.1757672 |
| C | 0.2040996  | 1.2976568  | -0.8123561 |
| N | -0.8741679 | 1.5382137  | -1.6330691 |
| H | -0.8760421 | 1.3727628  | -2.6576072 |
| C | -1.9734130 | 1.6128258  | -0.8241790 |
| H | -2.9749352 | 1.7622596  | -1.2272674 |
| N | -1.6919674 | 1.4869059  | 0.4753994  |
| C | -0.3207947 | 1.2792532  | 0.4969680  |
| C | 0.6145197  | 1.0005942  | 1.5297900  |
| O | 0.3032733  | 0.8600263  | 2.8222165  |
| H | -0.6896809 | 0.9007294  | 2.9335704  |
| N | 1.8977016  | 0.8257640  | 1.2118909  |
| C | 2.2588957  | 0.8841344  | -0.0985835 |
| N | 3.6008311  | 0.6141175  | -0.3428931 |
| H | 4.1865095  | 0.8354356  | 0.4586482  |
| H | 3.9307845  | 1.0412266  | -1.2050726 |
| N | -1.4555371 | -1.5744690 | -1.0804266 |

|   |            |            |            |
|---|------------|------------|------------|
| C | -1.9221182 | -1.6943821 | 0.1849255  |
| H | -3.0107025 | -1.6368731 | 0.3022174  |
| C | -1.1015594 | -1.8490434 | 1.2984036  |
| H | -1.5159718 | -1.8946569 | 2.3083331  |
| C | 0.2907332  | -1.9130298 | 1.0585136  |
| N | 1.2058636  | -2.0948352 | 2.0755795  |
| H | 2.1230482  | -1.7437777 | 1.7974610  |
| H | 0.9131628  | -1.6523645 | 2.9459123  |
| N | 0.7807287  | -1.8355011 | -0.1946498 |
| C | -0.1258814 | -1.6455938 | -1.1609424 |
| O | 0.3792024  | -1.4844024 | -2.4192065 |
| H | 1.3301283  | -1.3257045 | -2.2752651 |
| O | -0.9516078 | 0.4337735  | -4.1430408 |
| H | -0.2113006 | 0.5628895  | -4.7519684 |
| H | -0.6943470 | -0.3824979 | -3.6737495 |
| O | -2.3440370 | 0.8625674  | 3.0331970  |
| H | -2.6877233 | 1.6466508  | 3.4843309  |
| H | -2.4126946 | 1.1062863  | 2.0756943  |

35

G92C1W2 TS

|   |            |            |            |
|---|------------|------------|------------|
| N | 0.3978724  | 0.9309236  | 1.2285968  |
| C | 0.5104202  | -0.4085869 | 1.1237557  |
| N | -0.4154890 | -1.3591170 | 1.4695747  |
| H | -1.4010271 | -1.1666749 | 1.7449517  |
| C | 0.1409557  | -2.5705786 | 1.1251765  |
| H | -0.3934137 | -3.5064794 | 1.2975277  |
| N | 1.3717860  | -2.4938010 | 0.6144403  |
| C | 1.6103602  | -1.1322821 | 0.6099508  |
| C | 2.6740379  | -0.3239990 | 0.1545039  |
| O | 3.7848698  | -0.8765130 | -0.3656944 |
| H | 4.3554650  | -0.1142601 | -0.5722661 |
| N | 2.5913210  | 1.0047780  | 0.1980744  |
| C | 1.4610063  | 1.5697595  | 0.7154291  |
| N | 1.4263881  | 2.9534616  | 0.7307763  |
| H | 2.1156203  | 3.3560452  | 0.1009470  |
| H | 0.4860025  | 3.3072338  | 0.5517230  |
| N | 0.1235936  | 0.8512257  | -2.0029617 |
| C | 0.3567643  | -0.4558528 | -2.3110391 |
| H | 1.3044807  | -0.6867038 | -2.8054531 |
| C | -0.5750193 | -1.4050331 | -1.9859476 |
| H | -0.4073494 | -2.4588834 | -2.2117538 |
| C | -1.7414256 | -0.9347349 | -1.2841498 |
| N | -2.7158059 | -1.8220103 | -0.9139538 |
| H | -3.2732094 | -1.4901792 | -0.1224621 |
| H | -2.4287305 | -2.7938751 | -0.8539200 |
| N | -1.9540210 | 0.3407107  | -0.9787447 |
| C | -1.0241926 | 1.2923179  | -1.3173025 |
| O | -1.1360420 | 2.4916115  | -1.0347921 |
| H | 0.8230891  | 1.5627831  | -2.1993273 |
| O | -3.0646671 | -0.6122504 | 1.7930163  |
| H | -3.5502497 | -0.5986526 | 2.6296213  |
| H | -2.8854784 | 0.3602514  | 1.6303055  |
| O | -2.3055405 | 1.9396247  | 1.5898615  |
| H | -1.3512495 | 1.7253991  | 1.6533038  |
| H | -2.3397105 | 2.2159684  | 0.6550595  |

35

G92C2AW2 TS

|   |            |           |            |
|---|------------|-----------|------------|
| N | -1.1741626 | 1.2602303 | 0.4565078  |
| C | -0.5412991 | 1.3883959 | -0.7289475 |
| N | 0.2293414  | 2.4337593 | -1.1680029 |
| H | 0.4707695  | 3.2901770 | -0.6179318 |
| C | 0.7168906  | 2.0555446 | -2.3948672 |
| H | 1.3758944  | 2.7099783 | -2.9670640 |

|   |            |            |            |
|---|------------|------------|------------|
| N | 0.3111247  | 0.8502629  | -2.8081084 |
| C | -0.4908044 | 0.4286211  | -1.7628997 |
| C | -1.1782950 | -0.7690920 | -1.4805426 |
| O | -1.1722194 | -1.7908858 | -2.3615351 |
| H | -1.7009078 | -2.4806390 | -1.9192914 |
| N | -1.8188731 | -0.9399922 | -0.3282634 |
| C | -1.7748968 | 0.0674498  | 0.5876543  |
| N | -2.4754114 | -0.1672377 | 1.7622910  |
| H | -2.4746240 | -1.1550000 | 2.0094413  |
| H | -2.1493004 | 0.4212745  | 2.5261113  |
| N | 0.2562189  | -2.2191684 | 2.0809902  |
| C | 0.2240252  | -3.1966747 | 1.1441508  |
| H | -0.2867586 | -4.1230577 | 1.4320817  |
| C | 0.7950092  | -3.0599525 | -0.1137003 |
| H | 0.7656425  | -3.8673674 | -0.8493250 |
| C | 1.3991279  | -1.8121026 | -0.4091780 |
| N | 1.9800837  | -1.5718903 | -1.6314237 |
| H | 2.0859034  | -0.5774163 | -1.8294373 |
| H | 1.5216468  | -2.0484684 | -2.4055374 |
| N | 1.4705969  | -0.8302905 | 0.5128379  |
| C | 0.9054496  | -1.1158709 | 1.6896124  |
| O | 1.0168611  | -0.1325475 | 2.6260731  |
| H | 0.5963624  | -0.5145485 | 3.4161330  |
| O | 0.8771386  | 4.4721400  | 0.5387416  |
| H | 0.2194760  | 5.1661714  | 0.6823757  |
| H | 0.7670879  | 3.9049677  | 1.3425769  |
| O | 0.2067066  | 2.6904994  | 2.4556563  |
| H | 0.8281629  | 1.9495572  | 2.5454901  |
| H | -0.4469026 | 2.2804516  | 1.8470302  |

35

G92C2BW2 TS

|   |            |            |            |
|---|------------|------------|------------|
| N | -0.5311364 | 0.0075659  | -3.5899916 |
| C | -0.4955156 | 0.9634247  | -2.6476120 |
| N | -1.1972564 | 2.1534716  | -2.6429947 |
| H | -1.8341596 | 2.4659045  | -3.3697014 |
| C | -0.9154336 | 2.7912399  | -1.4645612 |
| H | -1.3583174 | 3.7518650  | -1.2008659 |
| N | -0.0578825 | 2.1109519  | -0.6992565 |
| C | 0.2223606  | 0.9661073  | -1.4371107 |
| C | 1.0409774  | -0.1779400 | -1.2054943 |
| O | 1.8551916  | -0.3548789 | -0.1845133 |
| H | 1.8434000  | 0.4401637  | 0.4441824  |
| N | 0.9821553  | -1.1809660 | -2.0925174 |
| C | 0.2153555  | -1.0436238 | -3.2095521 |
| N | 0.1702609  | -2.1651146 | -4.0212725 |
| H | 1.0118713  | -2.7316227 | -3.9604240 |
| H | -0.1154982 | -1.9531097 | -4.9735127 |
| N | -0.7067947 | -0.3005452 | 3.4418561  |
| C | -0.4701274 | -1.6153980 | 3.6559671  |
| H | -0.3561820 | -1.9166143 | 4.7039077  |
| C | -0.3500254 | -2.5480068 | 2.6344518  |
| H | -0.1398101 | -3.5996930 | 2.8440387  |
| C | -0.4636009 | -2.0594624 | 1.3096005  |
| N | -0.3358859 | -2.8824439 | 0.2200362  |
| H | -0.0362433 | -2.4112242 | -0.6373460 |
| H | 0.1871240  | -3.7354822 | 0.3965594  |
| N | -0.7598789 | -0.7643534 | 1.0738629  |
| C | -0.8518419 | 0.0278316  | 2.1487024  |
| O | -1.1153515 | 1.3343753  | 1.9345463  |
| H | -0.9640556 | 1.4998424  | 0.9801973  |
| O | 0.9328342  | 1.9861240  | 3.9468232  |
| H | 0.2336649  | 2.6196817  | 3.7303897  |
| H | 0.3916726  | 1.1769893  | 4.0589328  |
| O | 1.9046626  | 1.7272407  | 1.3501165  |

|   |           |           |           |
|---|-----------|-----------|-----------|
| H | 1.2304245 | 2.2498235 | 0.8822161 |
| H | 1.6206579 | 1.7638469 | 2.2940036 |
